# Supplementary material for: Integration of Genome-Wide DNA Methylation and Transcription Uncovered Aberrant Methylation-Regulated Genes and Pathways in the Peripheral Blood Mononuclear Cells of Systemic Sclerosis
Source: Int J Rheumatol. 2018 Sep 2;2018:7342472. doi: 10.1155/2018/7342472 (PMC6139224; doi:10.1155/2018/7342472)
Supplement: Supplementary 2 — Supplementary Table 1: the list of primer sequence used in QPCR validation of the 20 MeDEGs. [file 7342472.f2.xlsx]

## Sheet: Sheet1
Supplemantary Table 1_QPCR primer list
C3AR1 (NM_004054)	Forward	CCTGCTGATGTGGTCTCACCTA
	Reverse	CCTTGTGGTAGCTCAGACTCGT
CSTA (NM_005213)	Forward	AAACTCAAGTTGTTGCTGGAACAAA
	Reverse	TTTGTCAACCTGGTATCCAGTAAG
CTSG (NM_001911)	Forward	ACACCCAGCAACACATCACTGC
	Reverse	GGTTCACGTTTCGATTCCGTCTG
CTSZ (NM_001336)	Forward	GGATGGTGTCAACTATGCCAGC
	Reverse	CACGCTCCCTTCCTCTTGATGT
CXCR6 (NM_006564)	Forward	CAGTTCAGCAAGGTCTTTCTGCC
	Reverse	AGGTTCACCAGGAACACATCCG
ELANE (NM_001972)	Forward	TGCGCCCAACTTCGTCATGTCG
	Reverse	CGTAGCCGTTTTCGAAGATGCG
F2R (NM_001992)	Forward	GTTTCTGGCTGTGGTGTATCCC
	Reverse	CCTGGATGGTTTGCTCCTTGAG
FYN (NM_002037)	Forward	CTGGTCACCAAAGGAAGAGTGC
	Reverse	GGTCCTTTTTCCAGCAGTGGATC
LTBR (NM_002342)	Forward	CAACGAGCACTGGAACTACCTG
	Reverse	GGTCTTCCGTTTGCTTGTGCAG
NFE2 (NM_006163)	Forward	GGAGAGATGGAACTGACTTGGC
	Reverse	GAATCTGGGTGGATTGAGCAGG
ODF3B (NM_001014440)	Forward	CTGGCAGTTTCTTCGAGGACCT
	Reverse	AAGTCCGCGCCAGAATCGTGAA
PAG1 (NM_018440)	Forward	CAGACAAGGAGATGTTCAGCCG
	Reverse	CTGGACTTCCTCGTAATGCTGC
PLAUR (NM_002659)	Forward	CCACTCAGAGAAGACCAACAGG
	Reverse	GTAACGGCTTCGGGAATAGGTG
PRF1 (NM_005041)	Forward	ACTCACAGGCAGCCAACTTTGC
	Reverse	CTCTTGAAGTCAGGGTGCAGCG
PRKCH (NM_006255)	Forward	CATTTCGGCTCTCATGTTCCTCC
	Reverse	GCACATTCCGAAGTCTGCCAGT
RASSF5 (NM_182663)	Forward	GCACTGCTTCGCCGAGTTGGT
	Reverse	TGCAGTCCAACTGGATCAGGCT
RUNX3 (NM_004350)	Forward	GGCAATGACGAGAACTACTCCG
	Reverse	GATGGTCAGGGTGAAACTCTTCC
SAMD4A (NM_015589)	Forward	CTTGGTCTCCAGACCTGATGAG
	Reverse	GAGCTTCTGCACCTGCTGTTTC
SPI1 (NM_003120)	Forward	GACACGGATCTATACCAACGCC
	Reverse	CCGTGAAGTTGTTCTCGGCGAA
ZYX (NM_003461)	Forward	TTCCACATCGCCTGCTTCACCT
	Reverse	CGCAGGTGTTACACTTCTCCAG
GAPDH (NM_002046)	Forward	GTCTCCTCTGACTTCAACAGCG
	Reverse	ACCACCCTGTTGCTGTAGCCAA
