# Supplementary material for: Integration of Genome-Wide DNA Methylation and Transcription Uncovered Aberrant Methylation-Regulated Genes and Pathways in the Peripheral Blood Mononuclear Cells of Systemic Sclerosis
Source: Int J Rheumatol. 2018 Sep 2;2018:7342472. doi: 10.1155/2018/7342472 (PMC6139224; doi:10.1155/2018/7342472)
Supplement: Supplementary 3 — Supplementary Table 2: the complete list of differentially expressed genes (DEGs) identified in PBMC of SSc patients. [file 7342472.f3.xlsx]

## Sheet: DEG
	Supplementary Table 2-1 List of differentially expressed genes
ILMN_GENE	PROBE_ID	geneSymbol	ENTREZ_GENE_ID	ACCESSION	logFC	Fold_Change	P.Value	adj.P.Val	GENE_NAME
ABCA13	ILMN_1704579	ABCA13	154664	NM_152701	1.25917	2.39358	0.000762975	0.0401087	ATP binding cassette subfamily A member 13
ABCB1	ILMN_2094875	ABCB1	5243	NM_000927	-1.00622	-2.00865	3.22291e-07	0.00118315	ATP binding cassette subfamily B member 1
FAM108B1	ILMN_2374362	ABHD17B	51104	NM_016014	-0.80647	-1.74893	4.51627e-05	0.0107374	abhydrolase domain containing 17B
ABLIM1	ILMN_2396672	ABLIM1	3983	NM_001003407	-1.19455	-2.28873	4.6972e-05	0.0109363	actin binding LIM protein 1
ACPP	ILMN_1758323	ACPP	55	NM_001099	0.815304	1.75967	2.56895e-05	0.00883421	acid phosphatase, prostate
ACVRL1	ILMN_3250257	ACVRL1	94	NM_000020	0.734291	1.66358	0.000125597	0.0165063	activin A receptor like type 1
ADAMTSL4	ILMN_1687035	ADAMTSL4	54507	NM_025008	0.617299	1.534	2.04458e-05	0.0075603	ADAMTS like 4
ADAP2	ILMN_1763000	ADAP2	55803	NM_018404	0.623891	1.54103	1.44231e-05	0.00637562	ArfGAP with dual PH domains 2
ADM	ILMN_1708934	ADM	133	NM_001124	1.26088	2.39641	9.47344e-05	0.0152793	adrenomedullin
CENTG2	ILMN_1800530	AGAP1	116987	NM_014914	-0.829573	-1.77716	0.000375511	0.0279782	ArfGAP with GTPase domain, ankyrin repeat and PH domain 1
AGPAT2	ILMN_1732176	AGPAT2	10555	NM_006412	0.58648	1.50158	0.000190671	0.0201813	1-acylglycerol-3-phosphate O-acyltransferase 2
AGTRAP	ILMN_2307656	AGTRAP	57085	NM_001040194	0.667442	1.58825	3.70226e-05	0.0098614	angiotensin II receptor associated protein
AKIRIN1	ILMN_1679383	AKIRIN1	79647	NM_024595	-0.788646	-1.72745	5.58066e-05	0.0117617	akirin 1
ALDH3B1	ILMN_1728662	ALDH3B1	221	NM_000694	0.601594	1.51739	0.00023054	0.0219463	aldehyde dehydrogenase 3 family member B1
AMY1B	ILMN_1726327	AMY1B	277	NM_001008218	0.588286	1.50346	3.33971e-05	0.00969377	amylase, alpha 1B (salivary)
ANG	ILMN_1760727	ANG	283	NM_001097577	0.936659	1.91409	3.8152e-05	0.0099363	angiogenin, ribonuclease, RNase A family, 5
ANKRD33	ILMN_1667748	ANKRD33	341405	NM_182608	0.664525	1.58505	6.75307e-05	0.0130715	ankyrin repeat domain 33
ANKRD36	ILMN_2382431	ANKRD36	375248	NM_198555	-1.06512	-2.09235	5.53835e-05	0.0117502	ankyrin repeat domain 36
ANXA2P1	ILMN_1698100	ANXA2P1	303	NR_001562	0.780272	1.71745	4.71553e-05	0.0109363	annexin A2 pseudogene 1
ARG1	ILMN_1812281	ARG1	383	NM_000045	1.33504	2.52282	0.000490918	0.0322965	arginase 1
ARID4B	ILMN_1761334	ARID4B	51742	NM_016374	-0.859941	-1.81496	0.000517341	0.032774	AT-rich interaction domain 4B
ARL4C	ILMN_1768391	ARL4C	10123	NM_005737	-0.683644	-1.60619	6.0151e-06	0.00472269	ADP ribosylation factor like GTPase 4C
ASGR2	ILMN_1694966	ASGR2	433	NM_080914	0.812043	1.7557	0.000655139	0.0373622	asialoglycoprotein receptor 2
ATP6V0B	ILMN_2353642	ATP6V0B	533	NM_001039457	0.668155	1.58904	3.97865e-05	0.0102042	ATPase H+ transporting V0 subunit b
AUTS2	ILMN_1749081	AUTS2	26053	NM_015570	-0.796153	-1.73646	1.49251e-05	0.00637562	autism susceptibility candidate 2
BCL11B	ILMN_1665761	BCL11B	64919	NM_138576	-0.735284	-1.66473	2.94681e-05	0.00901842	B-cell CLL/lymphoma 11B
BEX1	ILMN_2234697	BEX1	55859	NM_018476	1.22681	2.34049	0.000187971	0.0201476	brain expressed X-linked 1
BLVRB	ILMN_1797793	BLVRB	645	NM_000713	0.734716	1.66407	0.000124831	0.0164727	biliverdin reductase B
BPI	ILMN_1766736	BPI	671	NM_001725	1.52463	2.87714	0.000688925	0.0378779	bactericidal/permeability-increasing protein
BRI3	ILMN_1781580	BRI3	25798	NM_015379	0.691803	1.6153	3.22932e-06	0.00392637	brain protein I3
BRWD1	ILMN_1761915	BRWD1	54014	NM_018963	-0.691132	-1.61455	0.000228241	0.0219463	bromodomain and WD repeat domain containing 1
BST1	ILMN_1770161	BST1	683	NM_004334	0.804208	1.74619	2.81072e-05	0.00893441	bone marrow stromal cell antigen 1
BST2	ILMN_1723480	BST2	684	NM_004335	0.737398	1.66717	0.000602942	0.0355248	bone marrow stromal cell antigen 2
C1orf21	ILMN_1797735	C1orf21	81563	NM_030806	-0.996963	-1.99579	1.36538e-05	0.0063332	chromosome 1 open reading frame 21
C1QA	ILMN_1737918	C1QA	712	NM_015991	0.607459	1.52357	0.000373381	0.0278634	complement component 1, q subcomponent, A chain
C1QB	ILMN_1796409	C1QB	713	NM_000491	1.29372	2.45159	0.000464391	0.0313427	complement component 1, q subcomponent, B chain
C1QC	ILMN_1785902	C1QC	714	NM_172369	1.0042	2.00583	8.62481e-06	0.00528486	complement component 1, q subcomponent, C chain
C2	ILMN_1710740	C2	717	NM_000063	0.838399	1.78806	8.31419e-05	0.0143562	complement component 2
C3AR1	ILMN_1787529	C3AR1	719	NM_004054	0.955297	1.93898	5.14775e-05	0.0115128	complement component 3a receptor 1
C5AR1	ILMN_1689836	C5AR1	728	NM_001736	0.853379	1.80673	0.000118183	0.0161953	complement component 5a receptor 1
C9orf66	ILMN_1717248	C9orf66	157983	NM_152569	0.636981	1.55507	0.000102267	0.0155431	chromosome 9 open reading frame 66
CAMK2N1	ILMN_1794863	CAMK2N1	55450	NM_018584	-0.87414	-1.83292	2.24233e-06	0.00371514	calcium/calmodulin-dependent protein kinase II inhibitor 1
CAPN7	ILMN_1685022	CAPN7	23473	NM_014296	-0.592156	-1.5075	0.00112821	0.0486675	calpain 7
ATPGD1	ILMN_1725746	CARNS1	57571	NM_020811	-0.732311	-1.6613	0.000527056	0.0332399	carnosine synthase 1
CASP2	ILMN_2296057	CASP2	835	NM_032982	-0.707366	-1.63282	0.000263797	0.0235995	caspase 2
CASP8	ILMN_1673757	CASP8	841	NM_001080125	-1.16394	-2.24069	1.31578e-05	0.0063332	caspase 8
CCR1	ILMN_1678833	CCR1	1230	NM_001295	0.922215	1.89502	0.000323353	0.0260937	chemokine (C-C motif) receptor 1
FAM190B	ILMN_2129388	CCSER2	54462	NM_018999	-0.744027	-1.67484	5.19935e-06	0.00424123	coiled-coil serine rich protein 2
CCT6A	ILMN_1719611	CCT6A	908	NM_001762	-0.786721	-1.72515	0.00103638	0.0463452	chaperonin containing TCP1 subunit 6A
CD160	ILMN_1742001	CD160	11126	NM_007053	-1.01853	-2.02585	3.7135e-06	0.00392637	CD160 molecule
CD163	ILMN_2379599	CD163	9332	NM_203416	0.65714	1.57695	0.000459128	0.0311741	CD163 molecule
CD177	ILMN_3251610	CD177	57126	NM_020406	0.684654	1.60732	0.00067443	0.0376725	CD177 molecule
CD2	ILMN_1695025	CD2	914	NM_001767	-0.642479	-1.56101	8.26347e-06	0.00528486	CD2 molecule
CD33	ILMN_1747622	CD33	945	NM_001772	0.617227	1.53392	2.64935e-05	0.00883421	CD33 molecule
CD8A	ILMN_1760374	CD8A	925	NM_001768	-1.08269	-2.11798	0.000896571	0.0434644	CD8a molecule
CD96	ILMN_2415786	CD96	10225	NM_005816	-0.781436	-1.71884	9.89004e-05	0.0153062	CD96 molecule
CDA	ILMN_1714592	CDA	978	NM_001785	0.860433	1.81558	0.00010661	0.0156644	cytidine deaminase
CDC14B	ILMN_1687074	CDC14B	8555	NM_033331	-0.977001	-1.96837	0.00036597	0.0275274	cell division cycle 14B
CDC42EP2	ILMN_1652777	CDC42EP2	10435	NM_006779	0.766184	1.70076	0.000230349	0.0219463	CDC42 effector protein 2
CDC42SE2	ILMN_1735594	CDC42SE2	56990	NM_020240	-1.02398	-2.03352	0.000232946	0.0219983	CDC42 small effector 2
ANRIL	ILMN_1887731	CDKN2B-AS1	100048912	NR_003529	0.589279	1.50449	0.000348721	0.0270915	CDKN2B antisense RNA 1
CEACAM1	ILMN_2371724	CEACAM1	634	NM_001024912	0.991641	1.98845	0.000539518	0.0336583	carcinoembryonic antigen related cell adhesion molecule 1
CEACAM6	ILMN_1712522	CEACAM6	4680	NM_002483	1.93816	3.83217	0.00027228	0.0239456	carcinoembryonic antigen related cell adhesion molecule 6
CEBPD	ILMN_1782050	CEBPD	1052	NM_005195	0.593641	1.50905	0.000273645	0.0239754	CCAAT/enhancer binding protein delta
CEBPE	ILMN_1779095	CEBPE	1053	NM_001805	0.78303	1.72074	0.00108664	0.047603	CCAAT/enhancer binding protein epsilon
CUGBP2	ILMN_1664170	CELF2	10659	NM_001025076	-0.601178	-1.51695	0.00109055	0.0476419	CUGBP, Elav-like family member 2
CEP120	ILMN_1781077	CEP120	153241	NM_153223	-0.736366	-1.66597	0.00108269	0.047518	centrosomal protein 120kDa
CEP78	ILMN_3185161	CEP78	84131	NM_001098802	-0.677364	-1.59922	1.53203e-05	0.00642154	centrosomal protein 78kDa
CFP	ILMN_1658121	CFP	5199	NM_002621	0.917014	1.8882	6.57053e-06	0.00472269	complement factor properdin
CHST13	ILMN_1734707	CHST13	166012	NM_152889	1.0099	2.01378	0.000133751	0.0168402	carbohydrate (chondroitin 4) sulfotransferase 13
CLDND2	ILMN_2077680	CLDND2	125875	NM_152353	-0.632544	-1.5503	0.000412349	0.0293298	claudin domain containing 2
CLEC2D	ILMN_1711702	CLEC2D	29121	NM_013269	-1.41409	-2.66492	0.000243593	0.0226868	C-type lectin domain family 2 member D
CLEC3B	ILMN_1682176	CLEC3B	7123	NM_003278	0.67936	1.60143	0.000822601	0.041575	C-type lectin domain family 3 member B
CLEC4C	ILMN_1665457	CLEC4C	170482	NM_130441	-0.821532	-1.76728	0.000124994	0.0164727	C-type lectin domain family 4 member C
CLEC4D	ILMN_1808979	CLEC4D	338339	NM_080387	0.80044	1.74163	2.79494e-05	0.00893441	C-type lectin domain family 4 member D
CLIP4	ILMN_1759792	CLIP4	79745	NM_024692	-0.677797	-1.5997	0.000619231	0.0362492	CAP-Gly domain containing linker protein family member 4
COL17A1	ILMN_1651282	COL17A1	1308	NM_000494	1.2615	2.39745	0.000119525	0.0161953	collagen type XVII alpha 1
COL6A2	ILMN_1809928	COL6A2	1292	NM_001849	-0.785415	-1.72359	1.49245e-05	0.00637562	collagen type VI alpha 2
GLT25D2	ILMN_1736742	COLGALT2	23127	NM_015101	-0.836073	-1.78518	9.14824e-07	0.00223587	collagen beta(1-O)galactosyltransferase 2
COLQ	ILMN_2329114	COLQ	8292	NM_080539	-0.692523	-1.61611	8.58998e-05	0.0144061	collagen-like tail subunit (single strand of homotrimer) of asymmetric acetylcholinesterase
CRY1	ILMN_1760593	CRY1	1407	NM_004075	-0.753268	-1.68561	0.000117552	0.0161953	cryptochrome circadian clock 1
CSTA	ILMN_1669888	CSTA	1475	NM_005213	0.941243	1.92018	7.49147e-06	0.00499206	cystatin A
CTBP1	ILMN_2278235	CTBP1	1487	NM_001012614	-0.657	-1.5768	0.000656579	0.0373664	C-terminal binding protein 1
CTSG	ILMN_1680424	CTSG	1511	NM_001911	1.80757	3.50053	0.000503653	0.0325092	cathepsin G
CTSZ	ILMN_1666269	CTSZ	1522	NM_001336	0.621895	1.5389	0.000527628	0.0332399	cathepsin Z
CXCR6	ILMN_1674640	CXCR6	10663	NM_006564	-1.04213	-2.05926	1.95715e-05	0.00740774	chemokine (C-X-C motif) receptor 6
C5orf32	ILMN_1761566	CYSTM1	84418	NM_032412	0.908088	1.87656	6.4935e-06	0.00472269	cysteine rich transmembrane module containing 1
DCAF16	ILMN_1753440	DCAF16	54876	NM_017741	-0.727868	-1.65619	9.6128e-05	0.0152793	DDB1 and CUL4 associated factor 16
DEFA1	ILMN_2193213	DEFA1	1667	NM_004084	1.6603	3.16083	0.000190344	0.0201813	defensin alpha 1
DEFA1B	ILMN_1725661	DEFA1B	728358	NM_001042500	1.9636	3.90034	0.000161578	0.0188749	defensin alpha 1B
DEFA3	ILMN_2165289	DEFA3	1668	NM_005217	1.97216	3.92356	0.00015143	0.0182558	defensin alpha 3
DOCK9	ILMN_1773413	DOCK9	23348	NM_015296	-1.02846	-2.03985	9.82788e-05	0.0153062	dedicator of cytokinesis 9
DOK3	ILMN_1692225	DOK3	79930	NM_024872	0.712169	1.63827	0.000370143	0.0276654	docking protein 3
DPAGT1	ILMN_1744244	DPAGT1	1798	NM_001382	-0.61381	-1.5303	0.000413488	0.0293298	dolichyl-phosphate N-acetylglucosaminephosphotransferase 1
DSC2	ILMN_1663119	DSC2	1824	NM_004949	0.762538	1.69647	0.0005522	0.0339751	desmocollin 2
C14orf126	ILMN_1704238	DTD2	112487	NM_080664	-0.589946	-1.50519	8.37744e-05	0.0144061	D-tyrosyl-tRNA deacylase 2 (putative)
DYRK1A	ILMN_1660663	DYRK1A	1859	NM_130437	-1.12442	-2.18013	0.000426744	0.029867	dual specificity tyrosine phosphorylation regulated kinase 1A
DYRK2	ILMN_1794588	DYRK2	8445	NM_003583	-0.805457	-1.7477	7.14977e-05	0.0136399	dual specificity tyrosine phosphorylation regulated kinase 2
DYSF	ILMN_1810420	DYSF	8291	NM_003494	1.01384	2.01927	0.000166117	0.019076	dysferlin
ECHDC3	ILMN_2072178	ECHDC3	79746	NM_024693	0.63685	1.55493	0.000493197	0.0322965	enoyl-CoA hydratase domain containing 3
ECM1	ILMN_2329735	ECM1	1893	NM_022664	0.585911	1.50099	0.000189501	0.0201476	extracellular matrix protein 1
C14orf143	ILMN_2193315	EFCAB11	90141	NM_145231	0.620154	1.53704	3.78302e-05	0.0099363	EF-hand calcium binding domain 11
EIF4B	ILMN_1655497	EIF4B	1975	NM_001417	-0.669779	-1.59083	6.00237e-05	0.0119816	eukaryotic translation initiation factor 4B
EIF4G2	ILMN_2279635	EIF4G2	1982	NM_001418	-1.12462	-2.18045	0.000990145	0.0454286	eukaryotic translation initiation factor 4 gamma 2
ELANE	ILMN_1706635	ELANE	1991	NM_001972	1.90416	3.7429	0.000219577	0.0218248	elastase, neutrophil expressed
ENPP3	ILMN_1749131	ENPP3	5169	NM_005021	-0.728126	-1.65649	0.000330185	0.0263435	ectonucleotide pyrophosphatase/phosphodiesterase 3
ENPP4	ILMN_1781761	ENPP4	22875	NM_014936	-0.6787	-1.6007	0.000587223	0.0350349	ectonucleotide pyrophosphatase/phosphodiesterase 4 (putative)
ENPP5	ILMN_1660727	ENPP5	59084	NM_021572	-0.654487	-1.57406	0.000133834	0.0168402	ectonucleotide pyrophosphatase/phosphodiesterase 5 (putative)
EOMES	ILMN_1760509	EOMES	8320	NM_005442	-0.70106	-1.6257	0.000508313	0.032548	eomesodermin
EPB41	ILMN_1667408	EPB41	2035	NM_004437	-0.903467	-1.87056	0.000362938	0.0275262	erythrocyte membrane protein band 4.1
ERBB2IP	ILMN_1805024	ERBIN	55914	NM_018695	-0.649254	-1.56836	0.000226092	0.0219463	erbb2 interacting protein
ERP44	ILMN_1772156	ERP44	23071	NM_015051	-0.63855	-1.55676	0.000406969	0.0291735	endoplasmic reticulum protein 44
ETS1	ILMN_1687538	ETS1	2113	NM_005238	-0.607292	-1.5234	8.57931e-05	0.0144061	ETS proto-oncogene 1, transcription factor
F2R	ILMN_1742866	F2R	2149	NM_001992	-1.13969	-2.20333	3.89795e-06	0.00392637	coagulation factor II thrombin receptor
FAH	ILMN_1781536	FAH	2184	NM_000137	0.715118	1.64162	5.42783e-05	0.0116695	fumarylacetoacetate hydrolase (fumarylacetoacetase)
FAM129B	ILMN_1661755	FAM129B	64855	NM_022833	0.674711	1.59628	0.00025112	0.0231031	family with sequence similarity 129 member B
FAM134B	ILMN_2283597	FAM134B	54463	NM_001034850	-0.901967	-1.86861	0.000252027	0.0231031	family with sequence similarity 134 member B
C4orf18	ILMN_1761941	FAM198B	51313	NM_016613	0.709081	1.63476	0.00067234	0.0376725	family with sequence similarity 198 member B
C3orf63	ILMN_1661409	FAM208A	23272	NM_015224	-0.627578	-1.54497	0.000478231	0.031976	family with sequence similarity 208 member A
FAM3C	ILMN_2368773	FAM3C	10447	NM_001040020	-0.765795	-1.70031	0.000314331	0.0257294	family with sequence similarity 3 member C
FBN2	ILMN_1670899	FBN2	2201	NM_001999	0.862088	1.81767	1.38233e-05	0.00634961	fibrillin 2
FBXL17	ILMN_1715901	FBXL17	64839	NM_022824	-0.694964	-1.61884	0.00031316	0.025678	F-box and leucine-rich repeat protein 17
FBXO3	ILMN_1749641	FBXO3	26273	NM_012175	-0.732127	-1.66109	2.69251e-05	0.00884639	F-box protein 3
FBXO32	ILMN_1652280	FBXO32	114907	NM_058229	-0.965524	-1.95277	3.59676e-05	0.0098614	F-box protein 32
FCGR1A	ILMN_2176063	FCGR1A	2209	NM_000566	0.968145	1.95632	4.30914e-05	0.010509	Fc fragment of IgG receptor Ia
FCN1	ILMN_1668063	FCN1	2219	NM_002003	0.588398	1.50358	3.68815e-06	0.00392637	ficolin 1
FCRL3	ILMN_1797428	FCRL3	115352	NM_052939	-1.17952	-2.26502	3.14792e-06	0.00392637	Fc receptor like 3
FCRL6	ILMN_2074762	FCRL6	343413	NM_001004310	-1.15277	-2.2234	1.47537e-05	0.00637562	Fc receptor like 6
FEZ1	ILMN_1779071	FEZ1	9638	NM_005103	-1.18725	-2.27719	5.79399e-06	0.00464619	fasciculation and elongation protein zeta 1
FGF9	ILMN_1762531	FGF9	2254	NM_002010	-0.640838	-1.55923	1.64864e-05	0.0066667	fibroblast growth factor 9
FKBP9L	ILMN_2089977	FKBP9P1	360132	NM_182827	0.732973	1.66206	0.000101849	0.0155431	FK506 binding protein 9 pseudogene 1
FPR1	ILMN_2092118	FPR1	2357	NM_002029	0.698882	1.62325	5.05423e-05	0.0114414	formyl peptide receptor 1
FXN	ILMN_1774826	FXN	2395	NM_000144	-0.72012	-1.64732	9.51248e-05	0.0152793	frataxin
FXYD6	ILMN_1768812	FXYD6	53826	NM_022003	0.725342	1.65329	0.00017015	0.0193061	FXYD domain containing ion transport regulator 6
FYN	ILMN_1781207	FYN	2534	NM_153047	-1.03058	-2.04285	0.00101262	0.0457584	FYN proto-oncogene, Src family tyrosine kinase
G3BP1	ILMN_2357809	G3BP1	10146	NM_198395	-0.809861	-1.75304	0.000193634	0.0204036	G3BP stress granule assembly factor 1
GAB1	ILMN_1666910	GAB1	2549	NM_207123	-0.591824	-1.50715	0.000175629	0.0196441	GRB2 associated binding protein 1
GALNT12	ILMN_1735157	GALNT12	79695	NM_024642	-0.723745	-1.65146	6.65491e-07	0.00174921	polypeptide N-acetylgalactosaminyltransferase 12
GK5	ILMN_1673892	GK5	256356	NM_001039547	-0.675167	-1.59678	0.000294549	0.0250762	glycerol kinase 5 (putative)
GLB1L2	ILMN_2144401	GLB1L2	89944	NM_138342	-0.588208	-1.50338	0.000730776	0.0391114	galactosidase beta 1 like 2
GNA15	ILMN_1773963	GNA15	2769	NM_002068	0.677582	1.59946	2.67013e-05	0.00883421	G protein subunit alpha 15
GNG2	ILMN_1807925	GNG2	54331	NM_053064	-0.73971	-1.66984	0.000905384	0.0436735	G protein subunit gamma 2
GNLY	ILMN_1708779	GNLY	10578	NM_006433	-1.4826	-2.79452	0.000486822	0.0322133	granulysin
GOLGA7	ILMN_2268921	GOLGA7	51125	NM_016099	-0.672406	-1.59373	1.06736e-05	0.00576943	golgin A7
GPBAR1	ILMN_2316386	GPBAR1	151306	NM_001077191	0.624218	1.54137	0.000413368	0.0293298	G protein-coupled bile acid receptor 1
GPM6B	ILMN_1735438	GPM6B	2824	NM_001001995	-0.76871	-1.70375	4.09633e-05	0.0103586	glycoprotein M6B
GPR89A	ILMN_2116594	GPR89B	51463	NM_016334	-0.814148	-1.75826	1.53372e-05	0.00642154	G protein-coupled receptor 89B
GRIP2	ILMN_1693827	GRIP2	80852	NM_001080423	0.605245	1.52124	0.00077367	0.0403571	glutamate receptor interacting protein 2
GRN	ILMN_1811702	GRN	2896	NM_002087	0.682186	1.60457	6.30609e-06	0.00472269	granulin
GUSBL1	ILMN_1780700	GUSBP2	387036	NM_001033523	-0.860571	-1.81576	0.000829318	0.041575	glucuronidase, beta pseudogene 2
GZMK	ILMN_1710734	GZMK	3003	NM_002104	-0.713058	-1.63928	7.18326e-05	0.0136488	granzyme K
H1F0	ILMN_1757467	H1F0	3005	NM_005318	0.645256	1.56402	0.000463324	0.0313154	H1 histone family member 0
HCK	ILMN_1791771	HCK	3055	NM_002110	0.671348	1.59256	3.67167e-05	0.0098614	HCK proto-oncogene, Src family tyrosine kinase
HDC	ILMN_1792323	HDC	3067	NM_002112	-1.30583	-2.47226	0.000162086	0.0188749	histidine decarboxylase
NA	ILMN_1912737	HIPK2	28996	BX538009	-0.76097	-1.69463	0.000335577	0.0266837	homeodomain interacting protein kinase 2
HIST2H2AA3	ILMN_2144426	HIST2H2AA3	8337	NM_003516	0.788427	1.72719	0.000389282	0.0285382	histone cluster 2, H2aa3
HIST2H2AC	ILMN_1768973	HIST2H2AC	8338	NM_003517	0.773725	1.70968	0.000673152	0.0376725	histone cluster 2, H2ac
HK3	ILMN_1670302	HK3	3101	NM_002115	0.873176	1.83169	3.14615e-07	0.00118315	hexokinase 3
HLA-C	ILMN_2150787	HLA-C	3107	NM_002117	1.05169	2.07296	0.000449898	0.0307151	major histocompatibility complex, class I, C
HLTF	ILMN_1798588	HLTF	6596	NM_003071	-0.623521	-1.54063	0.000447557	0.0305994	helicase-like transcription factor
HNRNPA1	ILMN_1663447	HNRNPA1	3178	NM_031157	-0.798468	-1.73925	0.000182576	0.0199775	heterogeneous nuclear ribonucleoprotein A1
HNRPA1L-2	ILMN_2220283	HNRNPA1P10	664709	NR_002944	-0.877244	-1.83686	1.46704e-05	0.00637562	heterogeneous nuclear ribonucleoprotein A1 pseudogene 10
HNRPDL	ILMN_1653432	HNRNPDL	9987	NR_003249	-0.868133	-1.8253	1.17905e-05	0.0059982	heterogeneous nuclear ribonucleoprotein D like
HOMER3	ILMN_1811579	HOMER3	9454	NM_004838	0.637359	1.55548	0.000158513	0.018758	homer scaffolding protein 3
HOPX	ILMN_2316236	HOPX	84525	NM_139212	-0.713758	-1.64007	0.00012106	0.0162716	HOP homeobox
HP	ILMN_1812433	HP	3240	NM_005143	1.25441	2.3857	0.000179549	0.0198574	haptoglobin
HPSE	ILMN_2092850	HPSE	10855	NM_006665	0.773855	1.70983	0.000249327	0.0230394	heparanase
HSPA1A	ILMN_1789074	HSPA1A	3303	NM_005345	0.727465	1.65573	0.000399665	0.028944	heat shock protein family A (Hsp70) member 1A
IFI27	ILMN_2058782	IFI27	3429	NM_005532	2.80007	6.96474	0.000784555	0.040567	interferon, alpha-inducible protein 27
IFI30	ILMN_1807277	IFI30	10437	NM_006332	0.789368	1.72832	1.95243e-05	0.00740774	interferon, gamma-inducible protein 30
IFI35	ILMN_1745374	IFI35	3430	NM_005533	0.700099	1.62462	7.40358e-05	0.013845	interferon induced protein 35
IFITM3	ILMN_1805750	IFITM3	10410	NM_021034	1.41086	2.65895	0.000126851	0.0165526	interferon induced transmembrane protein 3
IGFBP2	ILMN_1725193	IGFBP2	3485	NM_000597	0.956786	1.94098	0.000665166	0.0375917	insulin like growth factor binding protein 2
IGSF6	ILMN_1653498	IGSF6	10261	NM_005849	0.610429	1.52671	0.00104593	0.04649	immunoglobulin superfamily member 6
IL12RB1	ILMN_1699908	IL12RB1	3594	NM_153701	-0.823127	-1.76924	0.00026906	0.0238385	interleukin 12 receptor subunit beta 1
IL7R	ILMN_2342579	IL7R	3575	NM_002185	-0.85559	-1.8095	7.6911e-05	0.0139826	interleukin 7 receptor
JAK1	ILMN_1793384	JAK1	3716	NM_002227	-1.22186	-2.33247	0.000543753	0.0336945	Janus kinase 1
MYST4	ILMN_1698441	KAT6B	23522	NM_012330	-0.631008	-1.54865	0.000139744	0.0173988	lysine acetyltransferase 6B
KIAA0319L	ILMN_1683277	KIAA0319L	79932	NM_024874	0.588027	1.50319	5.7426e-05	0.0117617	KIAA0319 like
KIAA1324L	ILMN_1652371	KIAA1324L	222223	NM_152748	-0.771558	-1.70711	9.22794e-05	0.0150989	KIAA1324-like
KIAA2026	ILMN_2106227	KIAA2026	158358	NM_001017969	-0.65498	-1.57459	0.00117241	0.0494819	KIAA2026
KIR2DL3	ILMN_2402106	KIR2DL3	3804	NM_014511	-1.38158	-2.60553	5.15608e-05	0.0115128	killer cell immunoglobulin like receptor, two Ig domains and long cytoplasmic tail 3
KIR2DL5A	ILMN_2415653	KIR2DL5A	57292	NM_020535	-0.773699	-1.70965	0.000264365	0.0235995	killer cell immunoglobulin like receptor, two Ig domains and long cytoplasmic tail 5A
KIR2DS1	ILMN_2166812	KIR2DS1	3806	NM_014512	-0.607609	-1.52373	6.35469e-05	0.0124752	killer cell immunoglobulin like receptor, two Ig domains and short cytoplasmic tail 1
KIR2DS3	ILMN_1793525	KIR2DS3	3808	NM_012313	-0.803488	-1.74532	2.85149e-05	0.00893441	killer cell immunoglobulin like receptor, two Ig domains and short cytoplasmic tail 3
KIR2DS4	ILMN_1772787	KIR2DS4	3809	NM_012314	-0.760405	-1.69397	3.69609e-05	0.0098614	killer cell immunoglobulin like receptor, two Ig domains and short cytoplasmic tail 4
KIR3DL1	ILMN_1733245	KIR3DL1	3811	NM_013289	-1.05975	-2.08457	0.00064163	0.0368408	killer cell immunoglobulin like receptor, three Ig domains and long cytoplasmic tail 1
KLF12	ILMN_1714444	KLF12	11278	NM_007249	-0.861847	-1.81736	4.90147e-07	0.00154599	Kruppel-like factor 12
KLHDC8B	ILMN_1695246	KLHDC8B	200942	NM_173546	0.663886	1.58434	0.000284309	0.0246504	kelch domain containing 8B
KLHL3	ILMN_1770641	KLHL3	26249	NM_017415	-0.653306	-1.57277	0.000559624	0.0340759	kelch like family member 3
KLRA1	ILMN_1795431	KLRA1P	10748	NM_006611	-1.12522	-2.18135	6.40595e-06	0.00472269	killer cell lectin like receptor A1, pseudogene
KLRB1	ILMN_2079655	KLRB1	3820	NM_002258	-0.692829	-1.61645	3.11561e-05	0.00932224	killer cell lectin like receptor B1
KLRC1	ILMN_2384140	KLRC1	3821	NM_213657	-1.24364	-2.36795	0.000151142	0.0182558	killer cell lectin like receptor C1
KLRC2	ILMN_2059357	KLRC2	3822	NM_002260	-1.52713	-2.88212	0.000360107	0.0274796	killer cell lectin like receptor C2
KLRC3	ILMN_2386790	KLRC3	3823	NM_002261	-1.30672	-2.47379	3.38258e-07	0.00118315	killer cell lectin like receptor C3
KLRD1	ILMN_1797988	KLRD1	3824	NM_002262	-1.00902	-2.01255	4.72363e-06	0.00415561	killer cell lectin like receptor D1
KLRF1	ILMN_1685521	KLRF1	51348	NM_016523	-0.890653	-1.85402	3.88984e-06	0.00392637	killer cell lectin like receptor F1
KLRG1	ILMN_1658399	KLRG1	10219	NM_005810	-0.903242	-1.87026	9.26976e-06	0.00534843	killer cell lectin like receptor G1
MLL3	ILMN_1736165	KMT2C	58508	NM_170606	-0.858122	-1.81268	0.00022721	0.0219463	lysine methyltransferase 2C
LCN2	ILMN_1692223	LCN2	3934	NM_005564	1.30057	2.46327	0.000200504	0.0206672	lipocalin 2
LILRA5	ILMN_2266595	LILRA5	353514	NM_021250	0.677376	1.59923	1.57786e-05	0.00654841	leukocyte immunoglobulin like receptor A5
LINS1	ILMN_1669624	LINS1	55180	NM_181739	-0.792967	-1.73263	0.000908326	0.0436735	lines homolog 1
LMO2	ILMN_1800078	LMO2	4005	NM_005574	0.720956	1.64827	3.04441e-05	0.00917434	LIM domain only 2
LOC100134301	ILMN_3241856	LOC100134301	100134301	XM_001720715	-0.726157	-1.65423	1.02633e-05	0.00571269	uncharacterized LOC100134301
NA	ILMN_1817377	LOC286437	286437	CD172175	-0.639354	-1.55763	0.000690621	0.0378779	uncharacterized LOC286437
NA	ILMN_1861057	LOC338620	338620	BC043009	-0.605912	-1.52194	0.00118148	0.0496609	uncharacterized LOC338620
LOC374443	ILMN_1708905	LOC374443	374443	NR_002814	-0.606092	-1.52213	5.81722e-05	0.0117617	C-type lectin domain family 2 member D pseudogene
LOC400464	ILMN_1786168	LOC400464	400464	NM_001013670	-0.793192	-1.7329	8.23893e-05	0.0143562	uncharacterized LOC400464
LOC645385	ILMN_1720745	LOC645385	NA	XM_928427	-1.23234	-2.34947	0.000801075	0.0409909	NA
LOC653907	ILMN_1711611	LOC653907	NA	XM_936496	0.598678	1.51433	0.000429728	0.0299109	NA
LRG1	ILMN_1805228	LRG1	116844	NM_052972	0.869759	1.82736	0.000497228	0.0322965	leucine-rich alpha-2-glycoprotein 1
LRP3	ILMN_2127605	LRP3	4037	NM_002333	0.728898	1.65737	0.000152414	0.0182558	LDL receptor related protein 3
LOC389816	ILMN_2249018	LRRC26	389816	NM_001013653	-1.08578	-2.12252	4.5581e-06	0.00415561	leucine rich repeat containing 26
LST1	ILMN_1688373	LST1	7940	NM_205839	0.688809	1.61195	0.000119808	0.0161953	leukocyte specific transcript 1
LTBR	ILMN_1667476	LTBR	4055	NM_002342	1.18087	2.26713	5.41797e-09	0.000256335	lymphotoxin beta receptor
LY96	ILMN_1724533	LY96	23643	NM_015364	0.673038	1.59443	1.17114e-05	0.0059982	lymphocyte antigen 96
MACF1	ILMN_1737935	MACF1	23499	NM_012090	-0.791297	-1.73063	0.000209089	0.0213276	microtubule-actin crosslinking factor 1
MAEA	ILMN_1689257	MAEA	10296	NM_001017405	-0.767738	-1.7026	0.000418522	0.0295152	macrophage erythroblast attacher
MAFB	ILMN_1764709	MAFB	9935	NM_005461	0.86469	1.82095	0.000111328	0.0159129	v-maf avian musculoaponeurotic fibrosarcoma oncogene homolog B
MAGED1	ILMN_1762792	MAGED1	9500	NM_001005332	-0.610765	-1.52707	2.90294e-05	0.00897674	MAGE family member D1
MAP2K6	ILMN_1697729	MAP2K6	5608	NM_002758	-0.720326	-1.64755	0.000118037	0.0161953	mitogen-activated protein kinase kinase 6
MAP3K7	ILMN_2379326	MAP3K7	6885	NM_145333	-0.832022	-1.78018	0.000345781	0.0269516	mitogen-activated protein kinase kinase kinase 7
MOSC1	ILMN_1799106	MAR1	64757	NM_022746	0.762212	1.69609	7.47933e-05	0.013877	mitochondrial amidoxime reducing component 1
MAT2B	ILMN_1680246	MAT2B	27430	NM_013283	-1.40712	-2.65207	0.000175476	0.0196441	methionine adenosyltransferase 2B
MATK	ILMN_1669321	MATK	4145	NM_139355	-1.176	-2.25949	3.53988e-06	0.00392637	megakaryocyte-associated tyrosine kinase
MATR3	ILMN_2411076	MATR3	9782	NM_199189	-1.13306	-2.19324	0.000218676	0.0217811	matrin 3
MBP	ILMN_2331544	MBP	4155	NM_001025101	-0.975859	-1.96681	0.000815927	0.0414197	myelin basic protein
C19orf59	ILMN_1762713	MCEMP1	199675	NM_174918	1.15104	2.22074	2.58338e-07	0.00118315	mast cell-expressed membrane protein 1
MCOLN2	ILMN_1660462	MCOLN2	255231	NM_153259	-0.629178	-1.54668	0.000829533	0.041575	mucolipin 2
MCTP2	ILMN_1792682	MCTP2	55784	NM_018349	-0.832782	-1.78112	0.00025666	0.0233801	multiple C2 domains, transmembrane 2
MDFIC	ILMN_1717366	MDFIC	29969	NM_199072	-1.04296	-2.06046	0.000182834	0.0199775	MyoD family inhibitor domain containing
MDM1	ILMN_1736460	MDM1	56890	NM_017440	-0.810799	-1.75418	6.57626e-06	0.00472269	Mdm1 nuclear protein
MEFV	ILMN_2115752	MEFV	4210	NM_000243	0.816792	1.76148	0.000252459	0.0231031	Mediterranean fever
MGST1	ILMN_2355168	MGST1	4257	NM_145792	0.776688	1.71319	0.000102499	0.0155431	microsomal glutathione S-transferase 1
MIA3	ILMN_2312906	MIA3	375056	NM_198551	-0.657856	-1.57774	0.000100716	0.0154209	melanoma inhibitory activity family member 3
MRFAP1L1	ILMN_1764827	MRFAP1L1	114932	NM_152301	-0.822613	-1.76861	7.62983e-05	0.0139826	Morf4 family associated protein 1 like 1
MS4A4A	ILMN_2370336	MS4A4A	51338	NM_148975	1.18567	2.2747	0.000386492	0.0285138	membrane spanning 4-domains A4A
SEPX1	ILMN_1719661	MSRB1	51734	NM_016332	0.728961	1.65744	1.4958e-05	0.00637562	methionine sulfoxide reductase B1
MYBPC3	ILMN_1781184	MYBPC3	4607	NM_000256	0.668511	1.58943	0.000180082	0.0198574	myosin binding protein C, cardiac
MYL9	ILMN_1675062	MYL9	10398	NM_006097	1.21269	2.31769	4.90082e-05	0.0112013	myosin light chain 9
NACC2	ILMN_1809522	NACC2	138151	NM_144653	0.609937	1.52619	0.000846466	0.0420672	NACC family member 2
NCALD	ILMN_1788538	NCALD	83988	NM_032041	-0.851275	-1.80409	1.04979e-07	0.00113481	neurocalcin delta
NCF2	ILMN_1796642	NCF2	4688	NM_000433	0.837323	1.78673	1.08704e-06	0.00233772	neutrophil cytosolic factor 2
NCF4	ILMN_1785005	NCF4	4689	NM_000631	0.710058	1.63587	9.87745e-07	0.00223587	neutrophil cytosolic factor 4
NCR3	ILMN_2044471	NCR3	259197	NM_147130	-0.65688	-1.57667	0.000402937	0.0290066	natural cytotoxicity triggering receptor 3
PVRL2	ILMN_1718303	NECTIN2	5819	NM_002856	0.667435	1.58825	3.26158e-05	0.00952543	nectin cell adhesion molecule 2
NEK7	ILMN_1758548	NEK7	140609	NM_133494	-0.802947	-1.74466	0.000387828	0.0285138	NIMA related kinase 7
NFATC3	ILMN_1685810	NFATC3	4775	NM_173163	-0.876768	-1.83626	8.69338e-05	0.0144824	nuclear factor of activated T-cells, cytoplasmic, calcineurin-dependent 3
NFE2	ILMN_1711786	NFE2	4778	NM_006163	0.67138	1.5926	0.000871425	0.0429177	nuclear factor, erythroid 2
NFX1	ILMN_1698402	NFX1	4799	NM_147133	-0.714371	-1.64077	0.000996193	0.0455727	nuclear transcription factor, X-box binding 1
NKTR	ILMN_2330994	NKTR	4820	NM_001012651	-0.92474	-1.89834	0.000590153	0.0351654	natural killer cell triggering receptor
NLRC3	ILMN_3234784	NLRC3	197358	NM_178844	-0.616909	-1.53359	5.43023e-05	0.0116695	NLR family, CARD domain containing 3
NLRP12	ILMN_1716105	NLRP12	91662	NM_144687	0.690193	1.6135	1.85459e-05	0.00722465	NLR family, pyrin domain containing 12
NMT2	ILMN_2062620	NMT2	9397	NM_004808	-0.605891	-1.52192	0.000580246	0.0347937	N-myristoyltransferase 2
NOD2	ILMN_1762594	NOD2	64127	NM_022162	0.638733	1.55696	0.000344425	0.0269516	nucleotide binding oligomerization domain containing 2
NR2C1	ILMN_1774382	NR2C1	7181	NM_003297	-0.65288	-1.5723	0.000296507	0.0251404	nuclear receptor subfamily 2 group C member 1
NR2C2	ILMN_3251303	NR2C2	7182	NM_003298	-1.02194	-2.03064	6.73367e-05	0.0130715	nuclear receptor subfamily 2 group C member 2
D4S234E	ILMN_1772627	NSG1	27065	NM_001040101	-0.635517	-1.55349	0.000919649	0.0438613	neuron specific gene family member 1
FAM55C	ILMN_1814924	NXPE3	91775	NM_145037	-0.629755	-1.5473	0.00066241	0.0375779	neurexophilin and PC-esterase domain family member 3
OAF	ILMN_1668345	OAF	220323	NM_178507	0.741528	1.67195	0.000151811	0.0182558	out at first homolog
ODF3B	ILMN_3241446	ODF3B	440836	NM_001014440	0.78155	1.71898	7.01158e-05	0.0134304	outer dense fiber of sperm tails 3B
OLFM4	ILMN_2116877	OLFM4	10562	NM_006418	2.10202	4.2931	0.000707312	0.0384737	olfactomedin 4
OPLAH	ILMN_1711030	OPLAH	26873	NM_017570	0.653482	1.57296	0.000506075	0.032548	5-oxoprolinase (ATP-hydrolysing)
OR7E156P	ILMN_2090351	OR7E156P	283491	NR_002171	-0.633727	-1.55157	0.000619834	0.0362492	olfactory receptor family 7 subfamily E member 156 pseudogene
ORM1	ILMN_1696584	ORM1	5004	NM_000607	1.18537	2.27422	0.00091802	0.0438297	orosomucoid 1
OSCAR	ILMN_2367418	OSCAR	126014	NM_133169	0.764369	1.69863	3.1329e-05	0.00932224	osteoclast associated, immunoglobulin-like receptor
OTOF	ILMN_2340886	OTOF	9381	NM_194322	0.984998	1.97931	0.00100519	0.0457286	otoferlin
P2RY2	ILMN_2372915	P2RY2	5029	NM_002564	0.730901	1.65968	6.76894e-05	0.0130715	purinergic receptor P2Y2
P2RY8	ILMN_1768284	P2RY8	286530	NM_178129	-0.58511	-1.50015	0.000123899	0.0164727	purinergic receptor P2Y8
PACSIN1	ILMN_1751020	PACSIN1	29993	NM_020804	-0.725239	-1.65317	0.000299704	0.0253207	protein kinase C and casein kinase substrate in neurons 1
PAFAH2	ILMN_1682919	PAFAH2	5051	NM_000437	-0.596788	-1.51235	0.000109673	0.0157716	platelet activating factor acetylhydrolase 2
PAG1	ILMN_1673640	PAG1	55824	NM_018440	-0.685814	-1.60861	0.00118878	0.049773	phosphoprotein membrane anchor with glycosphingolipid microdomains 1
PAQR4	ILMN_1660793	PAQR4	124222	NM_152341	0.585165	1.50021	0.00111331	0.0484837	progestin and adipoQ receptor family member IV
PARP15	ILMN_1776778	PARP15	165631	NM_152615	-0.634492	-1.55239	0.000906913	0.0436735	poly(ADP-ribose) polymerase family member 15
PARP8	ILMN_1806651	PARP8	79668	NM_024615	-0.611214	-1.52754	4.74305e-06	0.00415561	poly(ADP-ribose) polymerase family member 8
PASK	ILMN_1754858	PASK	23178	NM_015148	-0.849708	-1.80214	0.000496764	0.0322965	PAS domain containing serine/threonine kinase
PCMTD2	ILMN_1767848	PCMTD2	55251	NM_018257	-0.58515	-1.50019	7.8694e-05	0.0141029	protein-L-isoaspartate (D-aspartate) O-methyltransferase domain containing 2
PDCD4	ILMN_1768004	PDCD4	27250	NM_145341	-0.724379	-1.65219	0.000459257	0.0311741	programmed cell death 4 (neoplastic transformation inhibitor)
PDE4D	ILMN_1791483	PDE4D	5144	NM_006203	-0.912682	-1.88254	0.00101227	0.0457584	phosphodiesterase 4D
PDE7A	ILMN_2278819	PDE7A	5150	NM_002603	-0.788713	-1.72753	0.000230067	0.0219463	phosphodiesterase 7A
PDGFD	ILMN_2376859	PDGFD	80310	NM_025208	-1.1006	-2.14444	1.22267e-06	0.00251509	platelet derived growth factor D
PDLIM7	ILMN_1690125	PDLIM7	9260	NM_213636	0.888941	1.85182	6.30502e-05	0.0124293	PDZ and LIM domain 7
PFKFB4	ILMN_1653292	PFKFB4	5210	NM_004567	0.596182	1.51171	1.1255e-05	0.00598309	6-phosphofructo-2-kinase/fructose-2,6-biphosphatase 4
PIK3C2A	ILMN_2166093	PIK3C2A	5286	NM_002645	-0.591824	-1.50715	0.000997946	0.0455727	phosphatidylinositol-4-phosphate 3-kinase catalytic subunit type 2 alpha
PIK3IP1	ILMN_1719986	PIK3IP1	113791	NM_052880	-0.608216	-1.52437	0.00108657	0.047603	phosphoinositide-3-kinase interacting protein 1
PIK3R1	ILMN_1760303	PIK3R1	5295	NM_181523	-0.595321	-1.51081	0.000664916	0.0375917	phosphoinositide-3-kinase regulatory subunit 1
PILRA	ILMN_2362858	PILRA	29992	NM_178272	0.594823	1.51029	0.000119573	0.0161953	paired immunoglobin-like type 2 receptor alpha
PITPNC1	ILMN_1738796	PITPNC1	26207	NM_012417	-0.612104	-1.52849	0.000663258	0.0375809	phosphatidylinositol transfer protein, cytoplasmic 1
PJA1	ILMN_2373566	PJA1	64219	NM_001032396	-0.602583	-1.51843	1.76166e-05	0.00697154	praja ring finger ubiquitin ligase 1
PKD2L1	ILMN_1789361	PKD2L1	9033	NM_016112	0.831894	1.78002	4.1259e-05	0.0103586	polycystin 2 like 1, transient receptor potential cation channel
PLAUR	ILMN_1691508	PLAUR	5329	NM_001005376	0.67235	1.59367	0.000552253	0.0339751	plasminogen activator, urokinase receptor
FLJ22662	ILMN_1707286	PLBD1	79887	NM_024829	0.689428	1.61264	0.000260944	0.0235158	phospholipase B domain containing 1
PLEKHA1	ILMN_1662839	PLEKHA1	59338	NM_001001974	-0.635087	-1.55303	0.000218638	0.0217811	pleckstrin homology domain containing A1
PLEKHA3	ILMN_1797576	PLEKHA3	65977	NM_019091	-0.74568	-1.67676	0.000347125	0.0270118	pleckstrin homology domain containing A3
PLXNB2	ILMN_1763447	PLXNB2	23654	NM_012401	0.674801	1.59638	8.11993e-05	0.0143347	plexin B2
PNPLA1	ILMN_1808241	PNPLA1	285848	NM_173676	0.635758	1.55375	0.000127351	0.0165528	patatin like phospholipase domain containing 1
POLR1E	ILMN_1678934	POLR1E	64425	NM_022490	-0.613664	-1.53014	4.43486e-05	0.0106509	polymerase (RNA) I subunit E
POLR2J4	ILMN_1754584	POLR2J4	84820	NR_003655	-0.787406	-1.72597	0.000115749	0.0161953	polymerase (RNA) II subunit J4, pseudogene
POT1	ILMN_2327203	POT1	25913	NR_003104	-0.664362	-1.58487	0.000686061	0.0378677	protection of telomeres 1
PPIA	ILMN_1704529	PPIA	5478	NM_021130	-1.06839	-2.09709	0.00049748	0.0322965	peptidylprolyl isomerase A
PPM1B	ILMN_2377210	PPM1B	5495	NM_177969	-0.772581	-1.70832	0.000133602	0.0168402	protein phosphatase, Mg2+/Mn2+ dependent 1B
PPP1R8	ILMN_2321485	PPP1R8	5511	NM_014110	-0.631019	-1.54866	0.00114058	0.048852	protein phosphatase 1 regulatory subunit 8
PPP2R2B	ILMN_1660732	PPP2R2B	5521	NM_181676	-0.725608	-1.6536	9.11726e-05	0.0150298	protein phosphatase 2 regulatory subunit B, beta
PPP2R5C	ILMN_1780913	PPP2R5C	5527	NM_002719	-0.840403	-1.79055	1.83995e-07	0.00118315	protein phosphatase 2 regulatory subunit B', gamma
PRAM1	ILMN_1711493	PRAM1	84106	NM_032152	0.671366	1.59258	0.000251524	0.0231031	PML-RARA regulated adaptor molecule 1
PRF1	ILMN_1740633	PRF1	5551	NM_005041	-0.631781	-1.54948	0.000724579	0.0388899	perforin 1
PRKCH	ILMN_1780898	PRKCH	5583	NM_006255	-0.660129	-1.58022	3.58019e-06	0.00392637	protein kinase C eta
PRSS23	ILMN_1797776	PRSS23	11098	NM_007173	-0.995054	-1.99316	0.000157679	0.0187439	protease, serine 23
NA	ILMN_1913537	PSMD6-AS2	100507062	AK023371	-0.859083	-1.81389	9.61423e-05	0.0152793	PSMD6 antisense RNA 2
PTCH1	ILMN_1800331	PTCH1	5727	NM_001083605	-0.908793	-1.87747	1.34902e-06	0.002553	patched 1
PTGDR	ILMN_1706268	PTGDR	5729	NM_000953	-0.776744	-1.71326	0.000362648	0.0275262	prostaglandin D2 receptor (DP)
PTPRC	ILMN_1804279	PTPRC	5788	NM_002838	-0.657046	-1.57685	0.00111392	0.0484837	protein tyrosine phosphatase, receptor type C
PYCARD	ILMN_1698766	PYCARD	29108	NM_013258	0.617057	1.53374	2.78324e-06	0.00392637	PYD and CARD domain containing
PYHIN1	ILMN_2395981	PYHIN1	149628	NM_152501	-0.850253	-1.80282	4.19401e-06	0.00402488	pyrin and HIN domain family member 1
QSOX1	ILMN_2411282	QSOX1	5768	NM_001004128	0.587641	1.50279	5.43028e-05	0.0116695	quiescin sulfhydryl oxidase 1
RAB34	ILMN_1810486	RAB34	83871	NM_031934	0.713718	1.64002	7.65728e-05	0.0139826	RAB34, member RAS oncogene family
FLJ43093	ILMN_2123450	RAB44	401258	NM_207498	0.677879	1.59979	0.000439036	0.0303236	RAB44, member RAS oncogene family
RAD17	ILMN_2321634	RAD17	5884	NM_133340	-0.646004	-1.56483	0.000343502	0.0269515	RAD17 checkpoint clamp loader component
RAE1	ILMN_1690259	RAE1	8480	NM_003610	-0.635722	-1.55372	8.19099e-05	0.0143562	ribonucleic acid export 1
RAP1GDS1	ILMN_1687724	RAP1GDS1	5910	NM_021159	-0.612667	-1.52908	0.000634663	0.036708	Rap1 GTPase-GDP dissociation stimulator 1
RASSF5	ILMN_1813795	RASSF5	83593	NM_182665	-0.934752	-1.91156	7.38208e-05	0.013845	Ras association domain family member 5
RBM47	ILMN_3306730	RBM47	54502	NM_019027	0.585316	1.50037	0.00088518	0.0432641	RNA binding motif protein 47
RBP7	ILMN_1716465	RBP7	116362	NM_052960	0.737051	1.66676	0.000356339	0.0274132	retinol binding protein 7
RENBP	ILMN_1780057	RENBP	5973	NM_002910	0.601746	1.51755	7.24535e-05	0.0137117	renin binding protein
REV3L	ILMN_2199947	REV3L	5980	NM_002912	-0.634799	-1.55272	0.00114613	0.048852	REV3 like, DNA directed polymerase zeta catalytic subunit
RHOB	ILMN_1802205	RHOB	388	NM_004040	1.01976	2.02758	0.000670268	0.0376725	ras homolog family member B
RHOBTB3	ILMN_1744949	RHOBTB3	22836	NM_014899	-0.823704	-1.76994	3.84534e-05	0.00994157	Rho related BTB domain containing 3
RIN2	ILMN_1769546	RIN2	54453	NM_018993	0.686425	1.60929	0.000368103	0.0276346	Ras and Rab interactor 2
RNASE1	ILMN_1795183	RNASE1	6035	NM_198232	0.690994	1.6144	0.000163102	0.0189134	ribonuclease A family member 1, pancreatic
RNASE2	ILMN_1730628	RNASE2	6036	NM_002934	1.48343	2.79613	4.5626e-08	0.0010696	ribonuclease A family member 2
RNASE3	ILMN_2113126	RNASE3	6037	NM_002935	1.69872	3.24612	4.61895e-05	0.0109266	ribonuclease A family member 3
RNF135	ILMN_1700660	RNF135	84282	NM_197939	0.585139	1.50018	4.15991e-05	0.0103586	ring finger protein 135
RNY4	ILMN_3241021	RNY4	6086	NR_004393	0.756631	1.68954	0.000485131	0.0321857	RNA, Ro-associated Y4
ROGDI	ILMN_1722738	ROGDI	79641	NM_024589	0.693617	1.61733	0.000489292	0.0322641	rogdi homolog
ROPN1L	ILMN_1696466	ROPN1L	83853	NM_031916	0.602797	1.51866	0.000368593	0.0276346	rhophilin associated tail protein 1-like
NA	ILMN_1862909	RORA	6095	AL832164	-0.977742	-1.96938	3.07707e-06	0.00392637	RAR related orphan receptor A
RPS23	ILMN_1772459	RPS23	6228	NM_001025	-0.637641	-1.55578	1.01067e-05	0.00571269	ribosomal protein S23
RRAGD	ILMN_1699772	RRAGD	58528	NM_021244	0.607246	1.52335	0.000196491	0.0205261	Ras related GTP binding D
RUNX3	ILMN_1787461	RUNX3	864	NM_004350	-0.61598	-1.5326	1.07311e-05	0.00576943	runt related transcription factor 3
RYK	ILMN_2363439	RYK	6259	NM_002958	-0.870519	-1.82832	2.16596e-05	0.00780405	receptor-like tyrosine kinase
S100A11	ILMN_1750101	S100A11	6282	NM_005620	0.705382	1.63058	1.34861e-05	0.0063332	S100 calcium binding protein A11
S1PR5	ILMN_2073184	S1PR5	53637	NM_030760	-0.766397	-1.70102	0.000186741	0.0201254	sphingosine-1-phosphate receptor 5
SAMD3	ILMN_2343618	SAMD3	154075	NM_001017373	-1.03648	-2.05122	6.64302e-07	0.00174921	sterile alpha motif domain containing 3
SAMD4A	ILMN_2119297	SAMD4A	23034	NM_015589	0.762508	1.69644	0.0004299	0.0299109	sterile alpha motif domain containing 4A
SATB1	ILMN_1690646	SATB1	6304	NM_002971	-0.698542	-1.62286	0.000229153	0.0219463	SATB homeobox 1
SCAMP5	ILMN_1753345	SCAMP5	192683	NM_138967	-0.62197	-1.53898	0.000136998	0.0171472	secretory carrier membrane protein 5
SCD5	ILMN_2237428	SCD5	79966	NM_001037582	-0.717107	-1.64388	0.000578097	0.0347534	stearoyl-CoA desaturase 5
SCML4	ILMN_1747436	SCML4	256380	NM_198081	-0.866008	-1.82261	4.39747e-05	0.0106178	sex comb on midleg-like 4 (Drosophila)
SCP2	ILMN_1694776	SCP2	6342	NM_002979	-0.634996	-1.55293	0.000902606	0.0436201	sterol carrier protein 2
SEP6	ILMN_1661342	SEP6	23157	NM_145799	-0.609751	-1.526	0.00103534	0.0463426	septin 6
SERPINB2	ILMN_2150856	SERPINB2	5055	NM_002575	0.771148	1.70663	0.000847433	0.0420711	serpin peptidase inhibitor, clade B (ovalbumin), member 2
SERPINB9	ILMN_1742052	SERPINB9	5272	NM_004155	-0.800466	-1.74166	0.000519421	0.0328102	serpin peptidase inhibitor, clade B (ovalbumin), member 9
SERTAD1	ILMN_1794017	SERTAD1	29950	NM_013376	0.642186	1.56069	0.000103222	0.0155906	SERTA domain containing 1
SESN1	ILMN_1800626	SESN1	27244	NM_014454	-0.705417	-1.63062	3.22542e-05	0.00947834	sestrin 1
SFMBT1	ILMN_2391750	SFMBT1	51460	NM_001005158	-0.897173	-1.86241	0.000300528	0.025345	Scm-like with four mbt domains 1
SH3KBP1	ILMN_1652650	SH3KBP1	30011	NM_001024666	-0.728792	-1.65725	0.00106866	0.0470329	SH3-domain kinase binding protein 1
SIGLEC16	ILMN_2229261	SIGLEC16	400709	NR_002825	0.896635	1.86172	0.000222125	0.0218941	sialic acid binding Ig like lectin 16 (gene/pseudogene)
SIGLECP3	ILMN_2209551	SIGLEC17P	284367	NR_002804	-0.840569	-1.79076	9.64314e-05	0.0152793	sialic acid binding Ig like lectin 17, pseudogene
SIGLEC5	ILMN_1740298	SIGLEC5	8778	NM_003830	0.652247	1.57161	0.000671278	0.0376725	sialic acid binding Ig like lectin 5
SIRPA	ILMN_2372974	SIRPA	140885	NM_080792	0.62475	1.54194	0.000221755	0.0218941	signal regulatory protein alpha
SKAP1	ILMN_2335604	SKAP1	8631	NM_001075099	-0.716723	-1.64345	8.61714e-05	0.0144061	src kinase associated phosphoprotein 1
SLAIN1	ILMN_2397795	SLAIN1	122060	NM_144595	-0.735388	-1.66485	5.27103e-05	0.0116695	SLAIN motif family member 1
SLAMF6	ILMN_2196078	SLAMF6	114836	NM_052931	-0.608725	-1.52491	8.307e-05	0.0143562	SLAM family member 6
SLC11A1	ILMN_1741165	SLC11A1	6556	NM_000578	0.588282	1.50346	0.000492823	0.0322965	solute carrier family 11 member 1
SLC12A2	ILMN_1720996	SLC12A2	6558	NM_001046	-0.672947	-1.59433	9.9034e-05	0.0153062	solute carrier family 12 member 2
SLC16A3	ILMN_2364022	SLC16A3	9123	NM_004207	0.708812	1.63446	3.13422e-06	0.00392637	solute carrier family 16 member 3
NA	ILMN_1847494	SLC16A7	9194	BG434785	-0.637145	-1.55525	0.000891149	0.0434213	solute carrier family 16 member 7
SLC22A4	ILMN_2050911	SLC22A4	6583	NM_003059	0.793032	1.73271	0.000112798	0.0159779	solute carrier family 22 member 4
SLC38A1	ILMN_2266948	SLC38A1	81539	NM_030674	-0.943832	-1.92363	1.25769e-05	0.00626871	solute carrier family 38 member 1
SLC4A7	ILMN_1808354	SLC4A7	9497	NM_003615	-0.695288	-1.61921	0.000988683	0.0454141	solute carrier family 4 member 7
SLC7A6	ILMN_2324561	SLC7A6	9057	NM_001076785	-0.763628	-1.69776	0.000753374	0.0398208	solute carrier family 7 member 6
SLFN13	ILMN_2215862	SLFN13	146857	NM_144682	-0.687714	-1.61073	0.000557637	0.0339986	schlafen family member 13
SLPI	ILMN_2114720	SLPI	6590	NM_003064	1.57309	2.97542	0.000107978	0.0157189	secretory leukocyte peptidase inhibitor
SMA5	ILMN_1662483	SMA5	11042	NM_021036	-0.819157	-1.76438	0.000997407	0.0455727	glucuronidase, beta pseudogene
SMAP1	ILMN_2363231	SMAP1	60682	NM_021940	-0.62717	-1.54453	0.000494757	0.0322965	small ArfGAP 1
SMARCD3	ILMN_2309180	SMARCD3	6604	NM_003078	0.685773	1.60856	4.49462e-05	0.0107374	SWI/SNF related, matrix associated, actin dependent regulator of chromatin, subfamily d, member 3
SMC4	ILMN_2251804	SMC4	10051	NM_001002800	-0.640298	-1.55865	0.00010632	0.0156644	structural maintenance of chromosomes 4
C11orf75	ILMN_1798270	SMCO4	56935	NM_020179	0.606736	1.52281	0.000114435	0.0160657	single-pass membrane protein with coiled-coil domains 4
LOC595101	ILMN_2200562	SMG1P5	595101	NR_002453	-0.693846	-1.61759	0.000147111	0.0180313	SMG1 pseudogene 5
SNAP23	ILMN_1687519	SNAP23	8773	NM_003825	-1.00263	-2.00365	0.000165216	0.0190187	synaptosome associated protein 23kDa
LOC85389	ILMN_1754332	SNORD14C	85389	NR_001453	-0.621519	-1.53849	0.00057912	0.0347707	small nucleolar RNA, C/D box 14C
SNORD31	ILMN_2072391	SNORD31	9298	NR_002560	-0.63452	-1.55242	0.000298345	0.025251	small nucleolar RNA, C/D box 31
SNRPD3	ILMN_1794599	SNRPD3	6634	NM_004175	-0.633903	-1.55176	0.000112194	0.0159403	small nuclear ribonucleoprotein D3 polypeptide
SNTB2	ILMN_1786766	SNTB2	6645	NM_006750	-0.660171	-1.58027	0.000285411	0.0246862	syntrophin beta 2
SON	ILMN_2323302	SON	6651	NM_138927	-0.72182	-1.64926	0.000552943	0.0339751	SON DNA binding protein
SPI1	ILMN_1696463	SPI1	6688	NM_001080547	0.812362	1.75608	0.000268032	0.023792	Spi-1 proto-oncogene
SPTBN1	ILMN_1661335	SPTBN1	6711	NM_003128	-0.736066	-1.66563	0.00021132	0.0214549	spectrin beta, non-erythrocytic 1
SRPK2	ILMN_1657451	SRPK2	6733	NM_182691	-0.858141	-1.8127	0.000214047	0.0215927	SRSF protein kinase 2
FAM10A7	ILMN_2080158	ST13P7	155019	NR_002198	-0.662893	-1.58325	0.00055389	0.0339782	suppression of tumorigenicity 13 (colon carcinoma) (Hsp70 interacting protein) pseudogene 7
STAT4	ILMN_1785202	STAT4	6775	NM_003151	-0.605939	-1.52197	0.000228143	0.0219463	signal transducer and activator of transcription 4
SULT1A1	ILMN_1656900	SULT1A1	6817	NM_177536	0.629532	1.54706	2.52961e-05	0.00880008	sulfotransferase family 1A member 1
SYNE2	ILMN_1754579	SYNE2	23224	NM_015180	-0.874544	-1.83343	7.41209e-06	0.00499206	spectrin repeat containing, nuclear envelope 2
AP1GBP1	ILMN_1805247	SYNRG	11276	NM_007247	-0.714616	-1.64105	2.1486e-05	0.00780405	synergin, gamma
SYTL2	ILMN_2240221	SYTL2	54843	NM_032943	-1.22432	-2.33645	2.28223e-07	0.00118315	synaptotagmin like 2
TACSTD2	ILMN_1739001	TACSTD2	4070	NM_002353	1.39559	2.63096	0.000769457	0.0402705	tumor-associated calcium signal transducer 2
TARP	ILMN_1723944	TARP	445347	NM_001003806	-1.20426	-2.30419	2.18595e-05	0.00780405	TCR gamma alternate reading frame protein
TAS2R45	ILMN_1702830	TAS2R45	259291	NM_176886	-0.689534	-1.61276	0.00031218	0.0256741	taste 2 receptor member 45
TBC1D2	ILMN_1769876	TBC1D2	55357	NM_018421	0.688628	1.61175	2.58145e-06	0.00392637	TBC1 domain family member 2
TCERG1	ILMN_2398039	TCERG1	10915	NM_006706	-0.654614	-1.57419	0.00089084	0.0434213	transcription elongation regulator 1
TCF7	ILMN_1676470	TCF7	6932	NM_213648	-0.824548	-1.77098	0.000751661	0.0398208	transcription factor 7 (T-cell specific, HMG-box)
TCN2	ILMN_1740572	TCN2	6948	NM_000355	1.36681	2.579	3.50104e-07	0.00118315	transcobalamin 2
TGFBR3	ILMN_1784287	TGFBR3	7049	NM_003243	-0.792053	-1.73154	3.57536e-05	0.0098614	transforming growth factor beta receptor III
TGM2	ILMN_1679267	TGM2	7052	NM_198951	0.590502	1.50577	0.000417901	0.0295152	transglutaminase 2
THEM4	ILMN_1682120	THEM4	117145	NM_053055	-0.608418	-1.52459	0.000259744	0.0235158	thioesterase superfamily member 4
C1orf38	ILMN_1735143	THEMIS2	9473	NM_004848	0.587008	1.50213	0.00030906	0.0256365	thymocyte selection associated family member 2
TIGIT	ILMN_2125017	TIGIT	201633	NM_173799	-0.611806	-1.52817	0.000863792	0.042661	T-cell immunoreceptor with Ig and ITIM domains
TMEM167A	ILMN_1742813	TMEM167A	153339	NM_174909	0.617643	1.53437	0.000433197	0.0300961	transmembrane protein 167A
TNFRSF21	ILMN_1699695	TNFRSF21	27242	NM_014452	-0.792515	-1.73209	0.000218133	0.0217811	tumor necrosis factor receptor superfamily member 21
TNFSF13B	ILMN_2066858	TNFSF13B	10673	NM_006573	0.610293	1.52657	2.21031e-05	0.00780405	tumor necrosis factor superfamily member 13b
TNIK	ILMN_1687442	TNIK	23043	NM_015028	-0.751677	-1.68375	0.000774838	0.0403735	TRAF2 and NCK interacting kinase
TNRC6C	ILMN_1746871	TNRC6C	57690	NM_018996	-0.609566	-1.5258	2.76251e-05	0.00893441	trinucleotide repeat containing 6C
C9orf167	ILMN_1813641	TOR4A	54863	NM_017723	0.592325	1.50767	0.000127809	0.0165668	torsin family 4 member A
TP53I3	ILMN_2358919	TP53I3	9540	NM_147184	0.706071	1.63136	0.000197862	0.0205742	tumor protein p53 inducible protein 3
LOC283392	ILMN_2096031	TRHDE-AS1	283392	NM_001025457	0.620737	1.53766	0.000701196	0.0383083	TRHDE antisense RNA 1
TRIM23	ILMN_1752741	TRIM23	373	NM_001656	-0.93317	-1.90947	1.62266e-05	0.00661823	tripartite motif containing 23
SPRYD5	ILMN_1753648	TRIM51	84767	NM_032681	-1.00115	-2.0016	0.00058171	0.0347937	tripartite motif-containing 51
TRIM61	ILMN_1706265	TRIM61	391712	NM_001012414	-0.641944	-1.56043	0.000436612	0.0302077	tripartite motif containing 61
TRIM7	ILMN_1756657	TRIM7	81786	NM_033342	0.629269	1.54678	3.44989e-05	0.0098614	tripartite motif containing 7
TRPC1	ILMN_1674380	TRPC1	7220	NM_003304	-0.639291	-1.55756	0.000915027	0.0437733	transient receptor potential cation channel subfamily C member 1
TSPO	ILMN_2349658	TSPO	706	NM_007311	0.63959	1.55789	4.05824e-05	0.0103228	translocator protein
TTC13	ILMN_1745573	TTC13	79573	NM_024525	-0.61176	-1.52812	5.02697e-06	0.00422137	tetratricopeptide repeat domain 13
TTYH3	ILMN_1692731	TTYH3	80727	NM_025250	0.728408	1.65681	0.000309509	0.0256365	tweety family member 3
TULP4	ILMN_2337740	TULP4	56995	NM_020245	-0.801878	-1.74337	0.000229151	0.0219463	tubby like protein 4
TXK	ILMN_1741143	TXK	7294	NM_003328	-1.08403	-2.11995	6.58813e-06	0.00472269	TXK tyrosine kinase
NA	ILMN_1882000	TXLNG	55787	U56251	-0.792853	-1.7325	0.000743801	0.0396304	taxilin gamma
ECGF1	ILMN_2109708	TYMP	1890	NM_001953	0.659203	1.57921	1.30659e-05	0.0063332	thymidine phosphorylase
UBTD1	ILMN_1794914	UBTD1	80019	NM_024954	0.651483	1.57078	0.000187288	0.0201386	ubiquitin domain containing 1
UNC93B1	ILMN_2193591	UNC93B1	81622	NM_030930	0.603351	1.51924	0.000266391	0.0237353	unc-93 homolog B1 (C. elegans)
USP14	ILMN_2402947	USP14	9097	NM_001037334	-0.87666	-1.83612	0.000184831	0.0200108	ubiquitin specific peptidase 14
USP22	ILMN_1666609	USP22	23326	NM_015276	-0.745219	-1.67623	0.000123734	0.0164727	ubiquitin specific peptidase 22
USP41	ILMN_1690365	USP41	373856	XM_036729	0.728741	1.65719	4.28723e-05	0.010509	ubiquitin specific peptidase 41
VPS13A	ILMN_2414826	VPS13A	23230	NM_033305	-0.655208	-1.57484	0.00035299	0.0271998	vacuolar protein sorting 13 homolog A (S. cerevisiae)
VPS13C	ILMN_1809582	VPS13C	54832	NM_017684	-0.633085	-1.55088	0.000955342	0.0447055	vacuolar protein sorting 13 homolog C (S. cerevisiae)
XPOT	ILMN_2188374	XPOT	11260	NM_007235	-0.758509	-1.69174	9.68844e-05	0.0152793	exportin, tRNA
YIF1B	ILMN_1773687	YIF1B	90522	NM_001031731	0.587169	1.5023	0.000103478	0.0155906	Yip1 interacting factor homolog B, membrane trafficking protein
NA	ILMN_1821270	YME1L1	10730	AY475219	-0.875993	-1.83527	0.000209164	0.0213276	YME1 like 1 ATPase
YPEL1	ILMN_1795338	YPEL1	29799	NM_013313	-0.771896	-1.70751	2.63444e-05	0.00883421	yippee like 1
YWHAZ	ILMN_1669286	YWHAZ	7534	NM_003406	-0.903079	-1.87005	0.00068753	0.0378677	tyrosine 3-monooxygenase/tryptophan 5-monooxygenase activation protein zeta
ZBTB16	ILMN_2402817	ZBTB16	7704	NM_001018011	-0.758149	-1.69132	1.48388e-05	0.00637562	zinc finger and BTB domain containing 16
ZBTB38	ILMN_2248863	ZBTB38	253461	NM_001080412	-0.653163	-1.57261	0.000302349	0.025363	zinc finger and BTB domain containing 38
ZFP82	ILMN_1740490	ZFP82	284406	NM_133466	-0.591391	-1.5067	0.000597581	0.0354295	ZFP82 zinc finger protein
ZFX	ILMN_1687484	ZFX	7543	NM_003410	-0.696556	-1.62063	0.000806741	0.0411299	zinc finger protein, X-linked
ZMAT3	ILMN_1654262	ZMAT3	64393	NM_152240	-1.0839	-2.11976	0.000598978	0.0354626	zinc finger matrin-type 3
ZMYM2	ILMN_2403823	ZMYM2	7750	NM_197968	-0.60772	-1.52385	0.000171415	0.0194019	zinc finger MYM-type containing 2
ZNF121	ILMN_1766613	ZNF121	7675	NM_001008727	-0.626411	-1.54372	0.00098391	0.0453454	zinc finger protein 121
ZNF286A	ILMN_1663858	ZNF286A	57335	NM_020652	-0.674479	-1.59602	8.08293e-06	0.00528486	zinc finger protein 286A
ZNF30	ILMN_1728230	ZNF30	90075	NM_001099437	-0.749604	-1.68133	0.000103801	0.0155906	zinc finger protein 30
ZNF365	ILMN_1658094	ZNF365	22891	NM_014951	-0.8598	-1.81479	0.000224901	0.0219463	zinc finger protein 365
ZNF429	ILMN_1695413	ZNF429	353088	NM_001001415	-0.697123	-1.62127	0.00042494	0.0298144	zinc finger protein 429
ZNF827	ILMN_1727574	ZNF827	152485	NM_178835	-0.656918	-1.57671	0.000161253	0.0188749	zinc finger protein 827
ZNF831	ILMN_1658016	ZNF831	128611	NM_178457	-0.701274	-1.62594	3.17259e-06	0.00392637	zinc finger protein 831
ZNF84	ILMN_3223798	ZNF84	7637	NM_003428	-0.678531	-1.60051	0.000557216	0.0339986	zinc finger protein 84
ZYX	ILMN_2371169	ZYX	7791	NM_003461	0.656952	1.57675	0.000679515	0.0377338	zyxin

## Sheet: Downregulated_probes
	Supplementary Table 2-2 List of down-regulated probes
ILMN_GENE	geneSymbol	PROBE_ID	ENTREZ_GENE_ID	ACCESSION	logFC	Fold_Change	P.Value	adj.P.Val	GENE_NAME
KLRC2	KLRC2	ILMN_2059357	3822	NM_002260	-1.52713	-2.88212	0.000360107	0.0274796	killer cell lectin like receptor C2
GNLY	GNLY	ILMN_1708779	10578	NM_006433	-1.4826	-2.79452	0.000486822	0.0322133	granulysin
CLEC2D	CLEC2D	ILMN_1711702	29121	NM_013269	-1.41409	-2.66492	0.000243593	0.0226868	C-type lectin domain family 2 member D
MAT2B	MAT2B	ILMN_1680246	27430	NM_013283	-1.40712	-2.65207	0.000175476	0.0196441	methionine adenosyltransferase 2B
KIR2DL3	KIR2DL3	ILMN_2402106	3804	NM_014511	-1.38158	-2.60553	5.15608e-05	0.0115128	killer cell immunoglobulin like receptor, two Ig domains and long cytoplasmic tail 3
KLRC3	KLRC3	ILMN_2386790	3823	NM_002261	-1.30672	-2.47379	3.38258e-07	0.00118315	killer cell lectin like receptor C3
HDC	HDC	ILMN_1792323	3067	NM_002112	-1.30583	-2.47226	0.000162086	0.0188749	histidine decarboxylase
KLRC1	KLRC1	ILMN_2384140	3821	NM_213657	-1.24364	-2.36795	0.000151142	0.0182558	killer cell lectin like receptor C1
LOC645385	NA	ILMN_1720745	NA	XM_928427	-1.23234	-2.34947	0.000801075	0.0409909	NA
NA	NA	ILMN_1875342	NA	AK124143	-1.22895	-2.34397	0.000685947	0.0378677	NA
SYTL2	SYTL2	ILMN_2240221	54843	NM_032943	-1.22432	-2.33645	2.28223e-07	0.00118315	synaptotagmin like 2
JAK1	JAK1	ILMN_1793384	3716	NM_002227	-1.22186	-2.33247	0.000543753	0.0336945	Janus kinase 1
TARP	TARP	ILMN_1723944	445347	NM_001003806	-1.20426	-2.30419	2.18595e-05	0.00780405	TCR gamma alternate reading frame protein
ABLIM1	ABLIM1	ILMN_2396672	3983	NM_001003407	-1.19455	-2.28873	4.6972e-05	0.0109363	actin binding LIM protein 1
LOC402112	NA	ILMN_3213568	NA	XR_019262	-1.19396	-2.2878	0.000403415	0.0290066	NA
LOC100131609	NA	ILMN_3215712	NA	XR_038433	-1.18766	-2.27783	0.000789629	0.0407848	NA
FEZ1	FEZ1	ILMN_1779071	9638	NM_005103	-1.18725	-2.27719	5.79399e-06	0.00464619	fasciculation and elongation protein zeta 1
FCRL3	FCRL3	ILMN_1797428	115352	NM_052939	-1.17952	-2.26502	3.14792e-06	0.00392637	Fc receptor like 3
MATK	MATK	ILMN_1669321	4145	NM_139355	-1.176	-2.25949	3.53988e-06	0.00392637	megakaryocyte-associated tyrosine kinase
LOC648210	NA	ILMN_1715947	NA	XR_018923	-1.16458	-2.24168	0.000768266	0.0402527	NA
CASP8	CASP8	ILMN_1673757	841	NM_001080125	-1.16394	-2.24069	1.31578e-05	0.0063332	caspase 8
LOC642083	NA	ILMN_1680772	NA	XM_942728	-1.16202	-2.2377	4.39866e-05	0.0106178	NA
LOC645436	NA	ILMN_1691611	NA	XM_928473	-1.15322	-2.22409	0.00099427	0.0455381	NA
FCRL6	FCRL6	ILMN_2074762	343413	NM_001004310	-1.15277	-2.2234	1.47537e-05	0.00637562	Fc receptor like 6
GNLY	GNLY	ILMN_2256295	10578	NM_012483	-1.15228	-2.22266	0.000106359	0.0156644	granulysin
F2R	F2R	ILMN_1742866	2149	NM_001992	-1.13969	-2.20333	3.89795e-06	0.00392637	coagulation factor II thrombin receptor
LOC100132528	NA	ILMN_3234436	NA	XR_038720	-1.135	-2.19618	0.000750153	0.0398096	NA
MATR3	MATR3	ILMN_2411076	9782	NM_199189	-1.13306	-2.19324	0.000218676	0.0217811	matrin 3
KLRA1	KLRA1P	ILMN_1795431	10748	NM_006611	-1.12522	-2.18135	6.40595e-06	0.00472269	killer cell lectin like receptor A1, pseudogene
EIF4G2	EIF4G2	ILMN_2279635	1982	NM_001418	-1.12462	-2.18045	0.000990145	0.0454286	eukaryotic translation initiation factor 4 gamma 2
DYRK1A	DYRK1A	ILMN_1660663	1859	NM_130437	-1.12442	-2.18013	0.000426744	0.029867	dual specificity tyrosine phosphorylation regulated kinase 1A
PDGFD	PDGFD	ILMN_2376859	80310	NM_025208	-1.1006	-2.14444	1.22267e-06	0.00251509	platelet derived growth factor D
LOC389816	LRRC26	ILMN_2249018	389816	NM_001013653	-1.08578	-2.12252	4.5581e-06	0.00415561	leucine rich repeat containing 26
TXK	TXK	ILMN_1741143	7294	NM_003328	-1.08403	-2.11995	6.58813e-06	0.00472269	TXK tyrosine kinase
ZMAT3	ZMAT3	ILMN_1654262	64393	NM_152240	-1.0839	-2.11976	0.000598978	0.0354626	zinc finger matrin-type 3
CD8A	CD8A	ILMN_1760374	925	NM_001768	-1.08269	-2.11798	0.000896571	0.0434644	CD8a molecule
PPIA	PPIA	ILMN_1704529	5478	NM_021130	-1.06839	-2.09709	0.00049748	0.0322965	peptidylprolyl isomerase A
ANKRD36	ANKRD36	ILMN_2382431	375248	NM_198555	-1.06512	-2.09235	5.53835e-05	0.0117502	ankyrin repeat domain 36
CASP8	CASP8	ILMN_2377733	841	NM_033355	-1.06208	-2.08793	0.00016237	0.0188749	caspase 8
KIR3DL1	KIR3DL1	ILMN_1733245	3811	NM_013289	-1.05975	-2.08457	0.00064163	0.0368408	killer cell immunoglobulin like receptor, three Ig domains and long cytoplasmic tail 1
MDFIC	MDFIC	ILMN_1717366	29969	NM_199072	-1.04296	-2.06046	0.000182834	0.0199775	MyoD family inhibitor domain containing
CXCR6	CXCR6	ILMN_1674640	10663	NM_006564	-1.04213	-2.05926	1.95715e-05	0.00740774	chemokine (C-X-C motif) receptor 6
SAMD3	SAMD3	ILMN_2343618	154075	NM_001017373	-1.03648	-2.05122	6.64302e-07	0.00174921	sterile alpha motif domain containing 3
KLRC1	KLRC1	ILMN_2384139	3821	NM_213657	-1.03305	-2.04635	0.000220763	0.0218941	killer cell lectin like receptor C1
FYN	FYN	ILMN_1781207	2534	NM_153047	-1.03058	-2.04285	0.00101262	0.0457584	FYN proto-oncogene, Src family tyrosine kinase
DOCK9	DOCK9	ILMN_1773413	23348	NM_015296	-1.02846	-2.03985	9.82788e-05	0.0153062	dedicator of cytokinesis 9
CDC42SE2	CDC42SE2	ILMN_1735594	56990	NM_020240	-1.02398	-2.03352	0.000232946	0.0219983	CDC42 small effector 2
NR2C2	NR2C2	ILMN_3251303	7182	NM_003298	-1.02194	-2.03064	6.73367e-05	0.0130715	nuclear receptor subfamily 2 group C member 2
CD160	CD160	ILMN_1742001	11126	NM_007053	-1.01853	-2.02585	3.7135e-06	0.00392637	CD160 molecule
SAMD3	SAMD3	ILMN_1755415	154075	NM_152552	-1.00906	-2.0126	1.21304e-07	0.00113481	sterile alpha motif domain containing 3
KLRD1	KLRD1	ILMN_1797988	3824	NM_002262	-1.00902	-2.01255	4.72363e-06	0.00415561	killer cell lectin like receptor D1
SYTL2	SYTL2	ILMN_1682929	54843	NM_206928	-1.0086	-2.01195	3.57766e-05	0.0098614	synaptotagmin like 2
HNRPA1P4	NA	ILMN_1690586	NA	XM_939887	-1.00744	-2.01035	5.08578e-06	0.00422137	NA
ABCB1	ABCB1	ILMN_2094875	5243	NM_000927	-1.00622	-2.00865	3.22291e-07	0.00118315	ATP binding cassette subfamily B member 1
SNAP23	SNAP23	ILMN_1687519	8773	NM_003825	-1.00263	-2.00365	0.000165216	0.0190187	synaptosome associated protein 23kDa
SPRYD5	TRIM51	ILMN_1753648	84767	NM_032681	-1.00115	-2.0016	0.00058171	0.0347937	tripartite motif-containing 51
C1orf21	C1orf21	ILMN_1797735	81563	NM_030806	-0.996963	-1.99579	1.36538e-05	0.0063332	chromosome 1 open reading frame 21
PRSS23	PRSS23	ILMN_1797776	11098	NM_007173	-0.995054	-1.99316	0.000157679	0.0187439	protease, serine 23
KLRC1	KLRC1	ILMN_1752647	3821	NM_213657	-0.993316	-1.99076	0.000539961	0.0336583	killer cell lectin like receptor C1
ANKRD36	ANKRD36	ILMN_2280568	375248	NM_198555	-0.986533	-1.98142	0.00102538	0.0461146	ankyrin repeat domain 36
NA	RORA	ILMN_1862909	6095	AL832164	-0.977742	-1.96938	3.07707e-06	0.00392637	RAR related orphan receptor A
CDC14B	CDC14B	ILMN_1687074	8555	NM_033331	-0.977001	-1.96837	0.00036597	0.0275274	cell division cycle 14B
MBP	MBP	ILMN_2331544	4155	NM_001025101	-0.975859	-1.96681	0.000815927	0.0414197	myelin basic protein
LOC388275	NA	ILMN_1676091	NA	XM_928429	-0.973024	-1.96295	2.00383e-06	0.00364636	NA
FBXO32	FBXO32	ILMN_1652280	114907	NM_058229	-0.965524	-1.95277	3.59676e-05	0.0098614	F-box protein 32
FCRL3	FCRL3	ILMN_1699599	115352	NM_052939	-0.960544	-1.94604	6.40236e-07	0.00174921	Fc receptor like 3
ABLIM1	ABLIM1	ILMN_1731610	3983	NM_006720	-0.951656	-1.93409	5.6763e-05	0.0117617	actin binding LIM protein 1
FEZ1	FEZ1	ILMN_1727992	9638	NM_022549	-0.947219	-1.92815	9.92417e-07	0.00223587	fasciculation and elongation protein zeta 1
ABCB1	ABCB1	ILMN_1812070	5243	NM_000927	-0.946806	-1.9276	1.43914e-07	0.00113481	ATP binding cassette subfamily B member 1
SLC38A1	SLC38A1	ILMN_2266948	81539	NM_030674	-0.943832	-1.92363	1.25769e-05	0.00626871	solute carrier family 38 member 1
RASSF5	RASSF5	ILMN_1813795	83593	NM_182665	-0.934752	-1.91156	7.38208e-05	0.013845	Ras association domain family member 5
TRIM23	TRIM23	ILMN_1752741	373	NM_001656	-0.93317	-1.90947	1.62266e-05	0.00661823	tripartite motif containing 23
KIR2DL3	KIR2DL3	ILMN_1667232	3804	NM_014511	-0.931566	-1.90735	0.00101089	0.0457584	killer cell immunoglobulin like receptor, two Ig domains and long cytoplasmic tail 3
KLRD1	KLRD1	ILMN_1799134	3824	NM_007334	-0.924809	-1.89843	1.13958e-05	0.00599063	killer cell lectin like receptor D1
NKTR	NKTR	ILMN_2330994	4820	NM_001012651	-0.92474	-1.89834	0.000590153	0.0351654	natural killer cell triggering receptor
LOC732432	NA	ILMN_3243055	NA	XM_001724189	-0.923251	-1.89638	0.000337107	0.0267197	NA
SYTL2	SYTL2	ILMN_2336609	54843	NM_206929	-0.913486	-1.88359	3.16021e-05	0.00934473	synaptotagmin like 2
PDE4D	PDE4D	ILMN_1791483	5144	NM_006203	-0.912682	-1.88254	0.00101227	0.0457584	phosphodiesterase 4D
LOC643831	NA	ILMN_1657728	NA	XM_927112	-0.90974	-1.87871	3.68093e-05	0.0098614	NA
PTCH1	PTCH1	ILMN_1800331	5727	NM_001083605	-0.908793	-1.87747	1.34902e-06	0.002553	patched 1
EPB41	EPB41	ILMN_1667408	2035	NM_004437	-0.903467	-1.87056	0.000362938	0.0275262	erythrocyte membrane protein band 4.1
KLRG1	KLRG1	ILMN_1658399	10219	NM_005810	-0.903242	-1.87026	9.26976e-06	0.00534843	killer cell lectin like receptor G1
YWHAZ	YWHAZ	ILMN_1669286	7534	NM_003406	-0.903079	-1.87005	0.00068753	0.0378677	tyrosine 3-monooxygenase/tryptophan 5-monooxygenase activation protein zeta
FAM134B	FAM134B	ILMN_2283597	54463	NM_001034850	-0.901967	-1.86861	0.000252027	0.0231031	family with sequence similarity 134 member B
LOC729423	NA	ILMN_3227811	NA	XM_001726952	-0.898743	-1.86444	5.68351e-05	0.0117617	NA
SFMBT1	SFMBT1	ILMN_2391750	51460	NM_001005158	-0.897173	-1.86241	0.000300528	0.025345	Scm-like with four mbt domains 1
KLRF1	KLRF1	ILMN_1685521	51348	NM_016523	-0.890653	-1.85402	3.88984e-06	0.00392637	killer cell lectin like receptor F1
LOC100133840	NA	ILMN_3247533	NA	XM_001714384	-0.889472	-1.8525	0.000777274	0.0403931	NA
MAT2B	MAT2B	ILMN_1673960	27430	NM_182796	-0.883909	-1.84537	9.54768e-05	0.0152793	methionine adenosyltransferase 2B
HNRPA1L-2	HNRNPA1P10	ILMN_2220283	664709	NR_002944	-0.877244	-1.83686	1.46704e-05	0.00637562	heterogeneous nuclear ribonucleoprotein A1 pseudogene 10
NFATC3	NFATC3	ILMN_1685810	4775	NM_173163	-0.876768	-1.83626	8.69338e-05	0.0144824	nuclear factor of activated T-cells, cytoplasmic, calcineurin-dependent 3
USP14	USP14	ILMN_2402947	9097	NM_001037334	-0.87666	-1.83612	0.000184831	0.0200108	ubiquitin specific peptidase 14
NA	YME1L1	ILMN_1821270	10730	AY475219	-0.875993	-1.83527	0.000209164	0.0213276	YME1 like 1 ATPase
SYNE2	SYNE2	ILMN_1754579	23224	NM_015180	-0.874544	-1.83343	7.41209e-06	0.00499206	spectrin repeat containing, nuclear envelope 2
CAMK2N1	CAMK2N1	ILMN_1794863	55450	NM_018584	-0.87414	-1.83292	2.24233e-06	0.00371514	calcium/calmodulin-dependent protein kinase II inhibitor 1
RYK	RYK	ILMN_2363439	6259	NM_002958	-0.870519	-1.82832	2.16596e-05	0.00780405	receptor-like tyrosine kinase
CLEC2D	CLEC2D	ILMN_1693781	29121	NM_001004420	-0.868659	-1.82597	3.05124e-06	0.00392637	C-type lectin domain family 2 member D
HNRPDL	HNRNPDL	ILMN_1653432	9987	NR_003249	-0.868133	-1.8253	1.17905e-05	0.0059982	heterogeneous nuclear ribonucleoprotein D like
LOC642817	NA	ILMN_1695034	NA	XR_018564	-0.866909	-1.82375	5.45075e-05	0.0116695	NA
SCML4	SCML4	ILMN_1747436	256380	NM_198081	-0.866008	-1.82261	4.39747e-05	0.0106178	sex comb on midleg-like 4 (Drosophila)
KLF12	KLF12	ILMN_1714444	11278	NM_007249	-0.861847	-1.81736	4.90147e-07	0.00154599	Kruppel-like factor 12
GUSBL1	GUSBP2	ILMN_1780700	387036	NM_001033523	-0.860571	-1.81576	0.000829318	0.041575	glucuronidase, beta pseudogene 2
ARID4B	ARID4B	ILMN_1761334	51742	NM_016374	-0.859941	-1.81496	0.000517341	0.032774	AT-rich interaction domain 4B
ZNF365	ZNF365	ILMN_1658094	22891	NM_014951	-0.8598	-1.81479	0.000224901	0.0219463	zinc finger protein 365
NA	PSMD6-AS2	ILMN_1913537	100507062	AK023371	-0.859083	-1.81389	9.61423e-05	0.0152793	PSMD6 antisense RNA 2
SRPK2	SRPK2	ILMN_1657451	6733	NM_182691	-0.858141	-1.8127	0.000214047	0.0215927	SRSF protein kinase 2
MLL3	KMT2C	ILMN_1736165	58508	NM_170606	-0.858122	-1.81268	0.00022721	0.0219463	lysine methyltransferase 2C
LOC730996	NA	ILMN_1659752	NA	XM_001128017	-0.857519	-1.81192	0.00085125	0.0422163	NA
IL7R	IL7R	ILMN_2342579	3575	NM_002185	-0.85559	-1.8095	7.6911e-05	0.0139826	interleukin 7 receptor
NCALD	NCALD	ILMN_1788538	83988	NM_032041	-0.851275	-1.80409	1.04979e-07	0.00113481	neurocalcin delta
PYHIN1	PYHIN1	ILMN_2395981	149628	NM_152501	-0.850253	-1.80282	4.19401e-06	0.00402488	pyrin and HIN domain family member 1
LOC652184	NA	ILMN_1742853	NA	XM_941546	-0.850027	-1.80253	0.000363548	0.0275262	NA
PASK	PASK	ILMN_1754858	23178	NM_015148	-0.849708	-1.80214	0.000496764	0.0322965	PAS domain containing serine/threonine kinase
LOC100132060	NA	ILMN_3244611	NA	XM_001720144	-0.849615	-1.80202	0.000134634	0.016896	NA
LOC731777	NA	ILMN_1703102	NA	XR_015950	-0.847473	-1.79935	0.00104748	0.04649	NA
SIGLECP3	SIGLEC17P	ILMN_2209551	284367	NR_002804	-0.840569	-1.79076	9.64314e-05	0.0152793	sialic acid binding Ig like lectin 17, pseudogene
PPP2R5C	PPP2R5C	ILMN_1780913	5527	NM_002719	-0.840403	-1.79055	1.83995e-07	0.00118315	protein phosphatase 2 regulatory subunit B', gamma
FCRL3	FCRL3	ILMN_1691693	115352	NM_001024667	-0.838659	-1.78839	4.83101e-06	0.00415573	Fc receptor like 3
GLT25D2	COLGALT2	ILMN_1736742	23127	NM_015101	-0.836073	-1.78518	9.14824e-07	0.00223587	collagen beta(1-O)galactosyltransferase 2
MCTP2	MCTP2	ILMN_1792682	55784	NM_018349	-0.832782	-1.78112	0.00025666	0.0233801	multiple C2 domains, transmembrane 2
MAP3K7	MAP3K7	ILMN_2379326	6885	NM_145333	-0.832022	-1.78018	0.000345781	0.0269516	mitogen-activated protein kinase kinase kinase 7
PRIM2A	NA	ILMN_1742922	NA	XM_001134299	-0.830166	-1.77789	0.00101202	0.0457584	NA
CENTG2	AGAP1	ILMN_1800530	116987	NM_014914	-0.829573	-1.77716	0.000375511	0.0279782	ArfGAP with GTPase domain, ankyrin repeat and PH domain 1
PYHIN1	PYHIN1	ILMN_1742026	149628	NM_198930	-0.826148	-1.77295	3.43069e-06	0.00392637	pyrin and HIN domain family member 1
TCF7	TCF7	ILMN_1676470	6932	NM_213648	-0.824548	-1.77098	0.000751661	0.0398208	transcription factor 7 (T-cell specific, HMG-box)
RHOBTB3	RHOBTB3	ILMN_1744949	22836	NM_014899	-0.823704	-1.76994	3.84534e-05	0.00994157	Rho related BTB domain containing 3
IL12RB1	IL12RB1	ILMN_1699908	3594	NM_153701	-0.823127	-1.76924	0.00026906	0.0238385	interleukin 12 receptor subunit beta 1
MRFAP1L1	MRFAP1L1	ILMN_1764827	114932	NM_152301	-0.822613	-1.76861	7.62983e-05	0.0139826	Morf4 family associated protein 1 like 1
CLEC4C	CLEC4C	ILMN_1665457	170482	NM_130441	-0.821532	-1.76728	0.000124994	0.0164727	C-type lectin domain family 4 member C
SMA5	SMA5	ILMN_1662483	11042	NM_021036	-0.819157	-1.76438	0.000997407	0.0455727	glucuronidase, beta pseudogene
GPR89A	GPR89B	ILMN_2116594	51463	NM_016334	-0.814148	-1.75826	1.53372e-05	0.00642154	G protein-coupled receptor 89B
MDM1	MDM1	ILMN_1736460	56890	NM_017440	-0.810799	-1.75418	6.57626e-06	0.00472269	Mdm1 nuclear protein
G3BP1	G3BP1	ILMN_2357809	10146	NM_198395	-0.809861	-1.75304	0.000193634	0.0204036	G3BP stress granule assembly factor 1
FAM108B1	ABHD17B	ILMN_2374362	51104	NM_016014	-0.80647	-1.74893	4.51627e-05	0.0107374	abhydrolase domain containing 17B
DYRK2	DYRK2	ILMN_1794588	8445	NM_003583	-0.805457	-1.7477	7.14977e-05	0.0136399	dual specificity tyrosine phosphorylation regulated kinase 2
RGPD8	NA	ILMN_3238854	NA	XM_001722279	-0.805088	-1.74725	0.000180574	0.0198574	NA
KIR2DS3	KIR2DS3	ILMN_1793525	3808	NM_012313	-0.803488	-1.74532	2.85149e-05	0.00893441	killer cell immunoglobulin like receptor, two Ig domains and short cytoplasmic tail 3
NEK7	NEK7	ILMN_1758548	140609	NM_133494	-0.802947	-1.74466	0.000387828	0.0285138	NIMA related kinase 7
C9orf38	NA	ILMN_1808251	NA	XM_939946	-0.802939	-1.74465	0.00114572	0.048852	NA
TULP4	TULP4	ILMN_2337740	56995	NM_020245	-0.801878	-1.74337	0.000229151	0.0219463	tubby like protein 4
KLF12	KLF12	ILMN_1762801	11278	NM_007249	-0.801425	-1.74282	0.000971083	0.045043	Kruppel-like factor 12
SERPINB9	SERPINB9	ILMN_1742052	5272	NM_004155	-0.800466	-1.74166	0.000519421	0.0328102	serpin peptidase inhibitor, clade B (ovalbumin), member 9
HNRNPA1	HNRNPA1	ILMN_1663447	3178	NM_031157	-0.798468	-1.73925	0.000182576	0.0199775	heterogeneous nuclear ribonucleoprotein A1
AUTS2	AUTS2	ILMN_1749081	26053	NM_015570	-0.796153	-1.73646	1.49251e-05	0.00637562	autism susceptibility candidate 2
LOC400464	LOC400464	ILMN_1786168	400464	NM_001013670	-0.793192	-1.7329	8.23893e-05	0.0143562	uncharacterized LOC400464
LINS1	LINS1	ILMN_1669624	55180	NM_181739	-0.792967	-1.73263	0.000908326	0.0436735	lines homolog 1
NA	TXLNG	ILMN_1882000	55787	U56251	-0.792853	-1.7325	0.000743801	0.0396304	taxilin gamma
TNFRSF21	TNFRSF21	ILMN_1699695	27242	NM_014452	-0.792515	-1.73209	0.000218133	0.0217811	tumor necrosis factor receptor superfamily member 21
LOC729102	NA	ILMN_3304022	NA	XR_015895	-0.792091	-1.73158	2.2772e-06	0.00371514	NA
TGFBR3	TGFBR3	ILMN_1784287	7049	NM_003243	-0.792053	-1.73154	3.57536e-05	0.0098614	transforming growth factor beta receptor III
MACF1	MACF1	ILMN_1737935	23499	NM_012090	-0.791297	-1.73063	0.000209089	0.0213276	microtubule-actin crosslinking factor 1
GPR89C	NA	ILMN_1696510	NA	NM_001097616	-0.789969	-1.72904	0.000762879	0.0401087	NA
PDE7A	PDE7A	ILMN_2278819	5150	NM_002603	-0.788713	-1.72753	0.000230067	0.0219463	phosphodiesterase 7A
AKIRIN1	AKIRIN1	ILMN_1679383	79647	NM_024595	-0.788646	-1.72745	5.58066e-05	0.0117617	akirin 1
POLR2J4	POLR2J4	ILMN_1754584	84820	NR_003655	-0.787406	-1.72597	0.000115749	0.0161953	polymerase (RNA) II subunit J4, pseudogene
CCT6A	CCT6A	ILMN_1719611	908	NM_001762	-0.786721	-1.72515	0.00103638	0.0463452	chaperonin containing TCP1 subunit 6A
NFATC3	NFATC3	ILMN_1800976	4775	NM_004555	-0.786468	-1.72485	0.000200232	0.0206672	nuclear factor of activated T-cells, cytoplasmic, calcineurin-dependent 3
COL6A2	COL6A2	ILMN_1809928	1292	NM_001849	-0.785415	-1.72359	1.49245e-05	0.00637562	collagen type VI alpha 2
KIR2DL5A	NA	ILMN_1685843	NA	XM_001126354	-0.784655	-1.72268	0.000668101	0.0376725	NA
CD96	CD96	ILMN_2415786	10225	NM_005816	-0.781436	-1.71884	9.89004e-05	0.0153062	CD96 molecule
LOC728047	NA	ILMN_3286389	NA	XM_001126912	-0.778213	-1.715	0.000949085	0.0445305	NA
PTGDR	PTGDR	ILMN_1706268	5729	NM_000953	-0.776744	-1.71326	0.000362648	0.0275262	prostaglandin D2 receptor (DP)
KIR2DL5A	KIR2DL5A	ILMN_2415653	57292	NM_020535	-0.773699	-1.70965	0.000264365	0.0235995	killer cell immunoglobulin like receptor, two Ig domains and long cytoplasmic tail 5A
PPM1B	PPM1B	ILMN_2377210	5495	NM_177969	-0.772581	-1.70832	0.000133602	0.0168402	protein phosphatase, Mg2+/Mn2+ dependent 1B
YPEL1	YPEL1	ILMN_1795338	29799	NM_013313	-0.771896	-1.70751	2.63444e-05	0.00883421	yippee like 1
KIAA1324L	KIAA1324L	ILMN_1652371	222223	NM_152748	-0.771558	-1.70711	9.22794e-05	0.0150989	KIAA1324-like
LOC653075	NA	ILMN_3208995	NA	XM_001724392	-0.770448	-1.7058	0.000151913	0.0182558	NA
GPM6B	GPM6B	ILMN_1735438	2824	NM_001001995	-0.76871	-1.70375	4.09633e-05	0.0103586	glycoprotein M6B
MAEA	MAEA	ILMN_1689257	10296	NM_001017405	-0.767738	-1.7026	0.000418522	0.0295152	macrophage erythroblast attacher
S1PR5	S1PR5	ILMN_2073184	53637	NM_030760	-0.766397	-1.70102	0.000186741	0.0201254	sphingosine-1-phosphate receptor 5
PDGFD	PDGFD	ILMN_1803094	80310	NM_033135	-0.76614	-1.70071	7.90671e-05	0.0141163	platelet derived growth factor D
FAM3C	FAM3C	ILMN_2368773	10447	NM_001040020	-0.765795	-1.70031	0.000314331	0.0257294	family with sequence similarity 3 member C
SLC7A6	SLC7A6	ILMN_2324561	9057	NM_001076785	-0.763628	-1.69776	0.000753374	0.0398208	solute carrier family 7 member 6
NA	HIPK2	ILMN_1912737	28996	BX538009	-0.76097	-1.69463	0.000335577	0.0266837	homeodomain interacting protein kinase 2
KIR2DS4	KIR2DS4	ILMN_1772787	3809	NM_012314	-0.760405	-1.69397	3.69609e-05	0.0098614	killer cell immunoglobulin like receptor, two Ig domains and short cytoplasmic tail 4
XPOT	XPOT	ILMN_2188374	11260	NM_007235	-0.758509	-1.69174	9.68844e-05	0.0152793	exportin, tRNA
ZBTB16	ZBTB16	ILMN_2402817	7704	NM_001018011	-0.758149	-1.69132	1.48388e-05	0.00637562	zinc finger and BTB domain containing 16
FAM3C	FAM3C	ILMN_1777261	10447	NM_001040020	-0.756626	-1.68953	0.000303791	0.0253695	family with sequence similarity 3 member C
CASP8	CASP8	ILMN_1787749	841	NM_033356	-0.756445	-1.68932	0.000690917	0.0378779	caspase 8
SIGLECP3	SIGLEC17P	ILMN_1688672	284367	NR_002804	-0.756078	-1.68889	0.000288608	0.0248718	sialic acid binding Ig like lectin 17, pseudogene
CRY1	CRY1	ILMN_1760593	1407	NM_004075	-0.753268	-1.68561	0.000117552	0.0161953	cryptochrome circadian clock 1
IL7R	NA	ILMN_1691341	NA	XM_937367	-0.753199	-1.68553	0.000237901	0.0222941	NA
LOC727787	NA	ILMN_1680056	NA	XM_001125802	-0.752937	-1.68522	3.76539e-05	0.0099363	NA
TNIK	TNIK	ILMN_1687442	23043	NM_015028	-0.751677	-1.68375	0.000774838	0.0403735	TRAF2 and NCK interacting kinase
KLRF1	KLRF1	ILMN_2055781	51348	NM_016523	-0.751007	-1.68297	4.66247e-05	0.0109363	killer cell lectin like receptor F1
ZNF30	ZNF30	ILMN_1728230	90075	NM_001099437	-0.749604	-1.68133	0.000103801	0.0155906	zinc finger protein 30
CD96	CD96	ILMN_1711573	10225	NM_198196	-0.746531	-1.67775	1.25872e-05	0.00626871	CD96 molecule
PLEKHA3	PLEKHA3	ILMN_1797576	65977	NM_019091	-0.74568	-1.67676	0.000347125	0.0270118	pleckstrin homology domain containing A3
USP22	USP22	ILMN_1666609	23326	NM_015276	-0.745219	-1.67623	0.000123734	0.0164727	ubiquitin specific peptidase 22
LOC728411	NA	ILMN_1770498	NA	XM_001128030	-0.74486	-1.67581	0.000262948	0.0235995	NA
FAM190B	CCSER2	ILMN_2129388	54462	NM_018999	-0.744027	-1.67484	5.19935e-06	0.00424123	coiled-coil serine rich protein 2
LOC652455	NA	ILMN_1744048	NA	XM_941904	-0.740434	-1.67068	9.57974e-05	0.0152793	NA
GNG2	GNG2	ILMN_1807925	54331	NM_053064	-0.73971	-1.66984	0.000905384	0.0436735	G protein subunit gamma 2
LOC728565	NA	ILMN_1682288	NA	XR_015320	-0.737821	-1.66766	0.000544038	0.0336945	NA
CEP120	CEP120	ILMN_1781077	153241	NM_153223	-0.736366	-1.66597	0.00108269	0.047518	centrosomal protein 120kDa
SPTBN1	SPTBN1	ILMN_1661335	6711	NM_003128	-0.736066	-1.66563	0.00021132	0.0214549	spectrin beta, non-erythrocytic 1
SLAIN1	SLAIN1	ILMN_2397795	122060	NM_144595	-0.735388	-1.66485	5.27103e-05	0.0116695	SLAIN motif family member 1
BCL11B	BCL11B	ILMN_1665761	64919	NM_138576	-0.735284	-1.66473	2.94681e-05	0.00901842	B-cell CLL/lymphoma 11B
LOC652615	NA	ILMN_1773797	NA	XM_942150	-0.734753	-1.66411	0.000323205	0.0260937	NA
ATPGD1	CARNS1	ILMN_1725746	57571	NM_020811	-0.732311	-1.6613	0.000527056	0.0332399	carnosine synthase 1
FBXO3	FBXO3	ILMN_1749641	26273	NM_012175	-0.732127	-1.66109	2.69251e-05	0.00884639	F-box protein 3
SH3KBP1	SH3KBP1	ILMN_1652650	30011	NM_001024666	-0.728792	-1.65725	0.00106866	0.0470329	SH3-domain kinase binding protein 1
ZBTB16	ZBTB16	ILMN_2305407	7704	NM_006006	-0.728709	-1.65716	1.34373e-06	0.002553	zinc finger and BTB domain containing 16
ENPP3	ENPP3	ILMN_1749131	5169	NM_005021	-0.728126	-1.65649	0.000330185	0.0263435	ectonucleotide pyrophosphatase/phosphodiesterase 3
DCAF16	DCAF16	ILMN_1753440	54876	NM_017741	-0.727868	-1.65619	9.6128e-05	0.0152793	DDB1 and CUL4 associated factor 16
MRFAP1L1	MRFAP1L1	ILMN_1693702	114932	NM_203462	-0.72753	-1.6558	1.70575e-05	0.0068392	Morf4 family associated protein 1 like 1
LOC100134301	LOC100134301	ILMN_3241856	100134301	XM_001720715	-0.726157	-1.65423	1.02633e-05	0.00571269	uncharacterized LOC100134301
PPP2R2B	PPP2R2B	ILMN_1660732	5521	NM_181676	-0.725608	-1.6536	9.11726e-05	0.0150298	protein phosphatase 2 regulatory subunit B, beta
PACSIN1	PACSIN1	ILMN_1751020	29993	NM_020804	-0.725239	-1.65317	0.000299704	0.0253207	protein kinase C and casein kinase substrate in neurons 1
PDCD4	PDCD4	ILMN_1768004	27250	NM_145341	-0.724379	-1.65219	0.000459257	0.0311741	programmed cell death 4 (neoplastic transformation inhibitor)
GALNT12	GALNT12	ILMN_1735157	79695	NM_024642	-0.723745	-1.65146	6.65491e-07	0.00174921	polypeptide N-acetylgalactosaminyltransferase 12
SON	SON	ILMN_2323302	6651	NM_138927	-0.72182	-1.64926	0.000552943	0.0339751	SON DNA binding protein
SAMD3	SAMD3	ILMN_1659158	154075	NM_001017373	-0.720885	-1.64819	5.79634e-05	0.0117617	sterile alpha motif domain containing 3
MAP2K6	MAP2K6	ILMN_1697729	5608	NM_002758	-0.720326	-1.64755	0.000118037	0.0161953	mitogen-activated protein kinase kinase 6
FXN	FXN	ILMN_1774826	2395	NM_000144	-0.72012	-1.64732	9.51248e-05	0.0152793	frataxin
SCD5	SCD5	ILMN_2237428	79966	NM_001037582	-0.717107	-1.64388	0.000578097	0.0347534	stearoyl-CoA desaturase 5
SKAP1	SKAP1	ILMN_2335604	8631	NM_001075099	-0.716723	-1.64345	8.61714e-05	0.0144061	src kinase associated phosphoprotein 1
KIAA0251	NA	ILMN_1703969	NA	XM_001125924	-0.715071	-1.64156	0.000113477	0.0159787	NA
AP1GBP1	SYNRG	ILMN_1805247	11276	NM_007247	-0.714616	-1.64105	2.1486e-05	0.00780405	synergin, gamma
NFX1	NFX1	ILMN_1698402	4799	NM_147133	-0.714371	-1.64077	0.000996193	0.0455727	nuclear transcription factor, X-box binding 1
HOPX	HOPX	ILMN_2316236	84525	NM_139212	-0.713758	-1.64007	0.00012106	0.0162716	HOP homeobox
NCALD	NCALD	ILMN_2343097	83988	NM_001040626	-0.713411	-1.63968	1.86297e-05	0.00722465	neurocalcin delta
GZMK	GZMK	ILMN_1710734	3003	NM_002104	-0.713058	-1.63928	7.18326e-05	0.0136488	granzyme K
NA	NA	ILMN_1847965	NA	CR603272	-0.71195	-1.63802	0.00115931	0.0491923	NA
ZNF136	NA	ILMN_1741288	NA	XM_001126650	-0.710563	-1.63644	0.000512449	0.0326752	NA
LOC727877	NA	ILMN_3236249	NA	XM_001126181	-0.707856	-1.63338	0.0010048	0.0457286	NA
CASP2	CASP2	ILMN_2296057	835	NM_032982	-0.707366	-1.63282	0.000263797	0.0235995	caspase 2
LOC440349	NA	ILMN_1761422	NA	XM_496129	-0.706474	-1.63181	0.000178413	0.0198574	NA
SESN1	SESN1	ILMN_1800626	27244	NM_014454	-0.705417	-1.63062	3.22542e-05	0.00947834	sestrin 1
LOC402112	NA	ILMN_3289650	NA	XR_038697	-0.704587	-1.62968	8.98137e-06	0.00528486	NA
ZNF831	ZNF831	ILMN_1658016	128611	NM_178457	-0.701274	-1.62594	3.17259e-06	0.00392637	zinc finger protein 831
EOMES	EOMES	ILMN_1760509	8320	NM_005442	-0.70106	-1.6257	0.000508313	0.032548	eomesodermin
SATB1	SATB1	ILMN_1690646	6304	NM_002971	-0.698542	-1.62286	0.000229153	0.0219463	SATB homeobox 1
ZNF429	ZNF429	ILMN_1695413	353088	NM_001001415	-0.697123	-1.62127	0.00042494	0.0298144	zinc finger protein 429
ZFX	ZFX	ILMN_1687484	7543	NM_003410	-0.696556	-1.62063	0.000806741	0.0411299	zinc finger protein, X-linked
SLC4A7	SLC4A7	ILMN_1808354	9497	NM_003615	-0.695288	-1.61921	0.000988683	0.0454141	solute carrier family 4 member 7
FBXL17	FBXL17	ILMN_1715901	64839	NM_022824	-0.694964	-1.61884	0.00031316	0.025678	F-box and leucine-rich repeat protein 17
SAMD3	SAMD3	ILMN_2258816	154075	NM_001017373	-0.694264	-1.61806	9.93196e-05	0.0153062	sterile alpha motif domain containing 3
LOC595101	SMG1P5	ILMN_2200562	595101	NR_002453	-0.693846	-1.61759	0.000147111	0.0180313	SMG1 pseudogene 5
KLRB1	KLRB1	ILMN_2079655	3820	NM_002258	-0.692829	-1.61645	3.11561e-05	0.00932224	killer cell lectin like receptor B1
CLEC4C	CLEC4C	ILMN_1682259	170482	NM_203503	-0.692571	-1.61616	0.00106217	0.0469193	C-type lectin domain family 4 member C
COLQ	COLQ	ILMN_2329114	8292	NM_080539	-0.692523	-1.61611	8.58998e-05	0.0144061	collagen-like tail subunit (single strand of homotrimer) of asymmetric acetylcholinesterase
ATPGD1	CARNS1	ILMN_3237981	57571	NM_020811	-0.691954	-1.61547	0.000334505	0.0266433	carnosine synthase 1
BRWD1	BRWD1	ILMN_1761915	54014	NM_018963	-0.691132	-1.61455	0.000228241	0.0219463	bromodomain and WD repeat domain containing 1
FBXO32	FBXO32	ILMN_1703955	114907	NM_148177	-0.691058	-1.61447	1.06393e-05	0.00576943	F-box protein 32
PYHIN1	PYHIN1	ILMN_1669447	149628	NM_198930	-0.690034	-1.61332	1.15626e-05	0.0059982	pyrin and HIN domain family member 1
TAS2R45	TAS2R45	ILMN_1702830	259291	NM_176886	-0.689534	-1.61276	0.00031218	0.0256741	taste 2 receptor member 45
SRPK2	SRPK2	ILMN_1695468	6733	NM_182692	-0.68883	-1.61198	0.000717599	0.0388386	SRSF protein kinase 2
SON	NA	ILMN_1668463	NA	NM_058183	-0.688371	-1.61146	0.000814966	0.0414157	NA
SLFN13	SLFN13	ILMN_2215862	146857	NM_144682	-0.687714	-1.61073	0.000557637	0.0339986	schlafen family member 13
PAG1	PAG1	ILMN_1673640	55824	NM_018440	-0.685814	-1.60861	0.00118878	0.049773	phosphoprotein membrane anchor with glycosphingolipid microdomains 1
HNRNPA1	HNRNPA1	ILMN_1815882	3178	NM_031157	-0.683978	-1.60656	0.00017016	0.0193061	heterogeneous nuclear ribonucleoprotein A1
ARL4C	ARL4C	ILMN_1768391	10123	NM_005737	-0.683644	-1.60619	6.0151e-06	0.00472269	ADP ribosylation factor like GTPase 4C
ENPP4	ENPP4	ILMN_1781761	22875	NM_014936	-0.6787	-1.6007	0.000587223	0.0350349	ectonucleotide pyrophosphatase/phosphodiesterase 4 (putative)
ZNF84	ZNF84	ILMN_3223798	7637	NM_003428	-0.678531	-1.60051	0.000557216	0.0339986	zinc finger protein 84
CLIP4	CLIP4	ILMN_1759792	79745	NM_024692	-0.677797	-1.5997	0.000619231	0.0362492	CAP-Gly domain containing linker protein family member 4
CEP78	CEP78	ILMN_3185161	84131	NM_001098802	-0.677364	-1.59922	1.53203e-05	0.00642154	centrosomal protein 78kDa
GK5	GK5	ILMN_1673892	256356	NM_001039547	-0.675167	-1.59678	0.000294549	0.0250762	glycerol kinase 5 (putative)
ZNF286A	ZNF286A	ILMN_1663858	57335	NM_020652	-0.674479	-1.59602	8.08293e-06	0.00528486	zinc finger protein 286A
SLC12A2	SLC12A2	ILMN_1720996	6558	NM_001046	-0.672947	-1.59433	9.9034e-05	0.0153062	solute carrier family 12 member 2
GOLGA7	GOLGA7	ILMN_2268921	51125	NM_016099	-0.672406	-1.59373	1.06736e-05	0.00576943	golgin A7
EIF4B	EIF4B	ILMN_1655497	1975	NM_001417	-0.669779	-1.59083	6.00237e-05	0.0119816	eukaryotic translation initiation factor 4B
NFATC3	NFATC3	ILMN_2360028	4775	NM_173165	-0.66601	-1.58668	0.000345292	0.0269516	nuclear factor of activated T-cells, cytoplasmic, calcineurin-dependent 3
POT1	POT1	ILMN_2327203	25913	NR_003104	-0.664362	-1.58487	0.000686061	0.0378677	protection of telomeres 1
FAM10A7	ST13P7	ILMN_2080158	155019	NR_002198	-0.662893	-1.58325	0.00055389	0.0339782	suppression of tumorigenicity 13 (colon carcinoma) (Hsp70 interacting protein) pseudogene 7
CEP78	CEP78	ILMN_3265365	84131	NM_032171	-0.661264	-1.58147	1.59845e-05	0.00657615	centrosomal protein 78kDa
SNTB2	SNTB2	ILMN_1786766	6645	NM_006750	-0.660171	-1.58027	0.000285411	0.0246862	syntrophin beta 2
PRKCH	PRKCH	ILMN_1780898	5583	NM_006255	-0.660129	-1.58022	3.58019e-06	0.00392637	protein kinase C eta
NA	YME1L1	ILMN_1843100	10730	AY375451	-0.658736	-1.5787	0.000836497	0.0417472	YME1 like 1 ATPase
MIA3	MIA3	ILMN_2312906	375056	NM_198551	-0.657856	-1.57774	0.000100716	0.0154209	melanoma inhibitory activity family member 3
PTPRC	PTPRC	ILMN_1804279	5788	NM_002838	-0.657046	-1.57685	0.00111392	0.0484837	protein tyrosine phosphatase, receptor type C
CTBP1	CTBP1	ILMN_2278235	1487	NM_001012614	-0.657	-1.5768	0.000656579	0.0373664	C-terminal binding protein 1
ZNF827	ZNF827	ILMN_1727574	152485	NM_178835	-0.656918	-1.57671	0.000161253	0.0188749	zinc finger protein 827
NCR3	NCR3	ILMN_2044471	259197	NM_147130	-0.65688	-1.57667	0.000402937	0.0290066	natural cytotoxicity triggering receptor 3
PASK	PASK	ILMN_1667022	23178	NM_015148	-0.656462	-1.57621	0.000765538	0.0401988	PAS domain containing serine/threonine kinase
VPS13A	VPS13A	ILMN_2414826	23230	NM_033305	-0.655208	-1.57484	0.00035299	0.0271998	vacuolar protein sorting 13 homolog A (S. cerevisiae)
KIAA2026	KIAA2026	ILMN_2106227	158358	NM_001017969	-0.65498	-1.57459	0.00117241	0.0494819	KIAA2026
TCERG1	TCERG1	ILMN_2398039	10915	NM_006706	-0.654614	-1.57419	0.00089084	0.0434213	transcription elongation regulator 1
ENPP5	ENPP5	ILMN_1660727	59084	NM_021572	-0.654487	-1.57406	0.000133834	0.0168402	ectonucleotide pyrophosphatase/phosphodiesterase 5 (putative)
KLHL3	KLHL3	ILMN_1770641	26249	NM_017415	-0.653306	-1.57277	0.000559624	0.0340759	kelch like family member 3
ZBTB38	ZBTB38	ILMN_2248863	253461	NM_001080412	-0.653163	-1.57261	0.000302349	0.025363	zinc finger and BTB domain containing 38
NR2C1	NR2C1	ILMN_1774382	7181	NM_003297	-0.65288	-1.5723	0.000296507	0.0251404	nuclear receptor subfamily 2 group C member 1
RYK	RYK	ILMN_1658526	6259	NM_001005861	-0.649863	-1.56902	0.000386995	0.0285138	receptor-like tyrosine kinase
NA	NA	ILMN_1845086	NA	AL110204	-0.649816	-1.56897	3.98347e-06	0.00392637	NA
ERBB2IP	ERBIN	ILMN_1805024	55914	NM_018695	-0.649254	-1.56836	0.000226092	0.0219463	erbb2 interacting protein
HOPX	HOPX	ILMN_1766643	84525	NM_139211	-0.647557	-1.56651	0.000838682	0.0418122	HOP homeobox
RAD17	RAD17	ILMN_2321634	5884	NM_133340	-0.646004	-1.56483	0.000343502	0.0269515	RAD17 checkpoint clamp loader component
CD2	CD2	ILMN_1695025	914	NM_001767	-0.642479	-1.56101	8.26347e-06	0.00528486	CD2 molecule
TRIM61	TRIM61	ILMN_1706265	391712	NM_001012414	-0.641944	-1.56043	0.000436612	0.0302077	tripartite motif containing 61
FGF9	FGF9	ILMN_1762531	2254	NM_002010	-0.640838	-1.55923	1.64864e-05	0.0066667	fibroblast growth factor 9
FYN	FYN	ILMN_2380801	2534	NM_153048	-0.640428	-1.55879	0.000108565	0.0157559	FYN proto-oncogene, Src family tyrosine kinase
SMC4	SMC4	ILMN_2251804	10051	NM_001002800	-0.640298	-1.55865	0.00010632	0.0156644	structural maintenance of chromosomes 4
NA	LOC286437	ILMN_1817377	286437	CD172175	-0.639354	-1.55763	0.000690621	0.0378779	uncharacterized LOC286437
TRPC1	TRPC1	ILMN_1674380	7220	NM_003304	-0.639291	-1.55756	0.000915027	0.0437733	transient receptor potential cation channel subfamily C member 1
ERP44	ERP44	ILMN_1772156	23071	NM_015051	-0.63855	-1.55676	0.000406969	0.0291735	endoplasmic reticulum protein 44
RPS23	RPS23	ILMN_1772459	6228	NM_001025	-0.637641	-1.55578	1.01067e-05	0.00571269	ribosomal protein S23
NA	SLC16A7	ILMN_1847494	9194	BG434785	-0.637145	-1.55525	0.000891149	0.0434213	solute carrier family 16 member 7
RAE1	RAE1	ILMN_1690259	8480	NM_003610	-0.635722	-1.55372	8.19099e-05	0.0143562	ribonucleic acid export 1
D4S234E	NSG1	ILMN_1772627	27065	NM_001040101	-0.635517	-1.55349	0.000919649	0.0438613	neuron specific gene family member 1
PLEKHA1	PLEKHA1	ILMN_1662839	59338	NM_001001974	-0.635087	-1.55303	0.000218638	0.0217811	pleckstrin homology domain containing A1
SCP2	SCP2	ILMN_1694776	6342	NM_002979	-0.634996	-1.55293	0.000902606	0.0436201	sterol carrier protein 2
REV3L	REV3L	ILMN_2199947	5980	NM_002912	-0.634799	-1.55272	0.00114613	0.048852	REV3 like, DNA directed polymerase zeta catalytic subunit
SNORD31	SNORD31	ILMN_2072391	9298	NR_002560	-0.63452	-1.55242	0.000298345	0.025251	small nucleolar RNA, C/D box 31
PARP15	PARP15	ILMN_1776778	165631	NM_152615	-0.634492	-1.55239	0.000906913	0.0436735	poly(ADP-ribose) polymerase family member 15
SNRPD3	SNRPD3	ILMN_1794599	6634	NM_004175	-0.633903	-1.55176	0.000112194	0.0159403	small nuclear ribonucleoprotein D3 polypeptide
OR7E156P	OR7E156P	ILMN_2090351	283491	NR_002171	-0.633727	-1.55157	0.000619834	0.0362492	olfactory receptor family 7 subfamily E member 156 pseudogene
VPS13C	VPS13C	ILMN_1809582	54832	NM_017684	-0.633085	-1.55088	0.000955342	0.0447055	vacuolar protein sorting 13 homolog C (S. cerevisiae)
KIAA1671	NA	ILMN_1772821	NA	XM_371461	-0.633017	-1.5508	0.000338936	0.026776	NA
CLDND2	CLDND2	ILMN_2077680	125875	NM_152353	-0.632544	-1.5503	0.000412349	0.0293298	claudin domain containing 2
PRF1	PRF1	ILMN_1740633	5551	NM_005041	-0.631781	-1.54948	0.000724579	0.0388899	perforin 1
PPP1R8	PPP1R8	ILMN_2321485	5511	NM_014110	-0.631019	-1.54866	0.00114058	0.048852	protein phosphatase 1 regulatory subunit 8
MYST4	KAT6B	ILMN_1698441	23522	NM_012330	-0.631008	-1.54865	0.000139744	0.0173988	lysine acetyltransferase 6B
LOC100128771	NA	ILMN_3263694	NA	XR_037860	-0.630183	-1.54776	0.000153469	0.0183357	NA
FAM55C	NXPE3	ILMN_1814924	91775	NM_145037	-0.629755	-1.5473	0.00066241	0.0375779	neurexophilin and PC-esterase domain family member 3
MCOLN2	MCOLN2	ILMN_1660462	255231	NM_153259	-0.629178	-1.54668	0.000829533	0.041575	mucolipin 2
LOC653234	NA	ILMN_1734553	NA	XR_016668	-0.627661	-1.54506	0.000161434	0.0188749	NA
C3orf63	FAM208A	ILMN_1661409	23272	NM_015224	-0.627578	-1.54497	0.000478231	0.031976	family with sequence similarity 208 member A
SPTBN1	SPTBN1	ILMN_1690708	6711	NM_003128	-0.627375	-1.54475	5.02596e-05	0.0114321	spectrin beta, non-erythrocytic 1
SMAP1	SMAP1	ILMN_2363231	60682	NM_021940	-0.62717	-1.54453	0.000494757	0.0322965	small ArfGAP 1
LOC732360	NA	ILMN_3305871	NA	XR_016089	-0.626437	-1.54375	0.000446168	0.0305592	NA
ZNF121	ZNF121	ILMN_1766613	7675	NM_001008727	-0.626411	-1.54372	0.00098391	0.0453454	zinc finger protein 121
HLTF	HLTF	ILMN_1798588	6596	NM_003071	-0.623521	-1.54063	0.000447557	0.0305994	helicase-like transcription factor
PPP2R2B	PPP2R2B	ILMN_2360202	5521	NM_181676	-0.623336	-1.54043	0.000738489	0.039435	protein phosphatase 2 regulatory subunit B, beta
SCAMP5	SCAMP5	ILMN_1753345	192683	NM_138967	-0.62197	-1.53898	0.000136998	0.0171472	secretory carrier membrane protein 5
LOC85389	SNORD14C	ILMN_1754332	85389	NR_001453	-0.621519	-1.53849	0.00057912	0.0347707	small nucleolar RNA, C/D box 14C
NLRC3	NLRC3	ILMN_3234784	197358	NM_178844	-0.616909	-1.53359	5.43023e-05	0.0116695	NLR family, CARD domain containing 3
RUNX3	RUNX3	ILMN_1787461	864	NM_004350	-0.61598	-1.5326	1.07311e-05	0.00576943	runt related transcription factor 3
FLJ16686	NA	ILMN_1765773	NA	XM_940851	-0.614113	-1.53062	0.000201788	0.0207544	NA
DPAGT1	DPAGT1	ILMN_1744244	1798	NM_001382	-0.61381	-1.5303	0.000413488	0.0293298	dolichyl-phosphate N-acetylglucosaminephosphotransferase 1
POLR1E	POLR1E	ILMN_1678934	64425	NM_022490	-0.613664	-1.53014	4.43486e-05	0.0106509	polymerase (RNA) I subunit E
RAP1GDS1	RAP1GDS1	ILMN_1687724	5910	NM_021159	-0.612667	-1.52908	0.000634663	0.036708	Rap1 GTPase-GDP dissociation stimulator 1
PITPNC1	PITPNC1	ILMN_1738796	26207	NM_012417	-0.612104	-1.52849	0.000663258	0.0375809	phosphatidylinositol transfer protein, cytoplasmic 1
TIGIT	TIGIT	ILMN_2125017	201633	NM_173799	-0.611806	-1.52817	0.000863792	0.042661	T-cell immunoreceptor with Ig and ITIM domains
TTC13	TTC13	ILMN_1745573	79573	NM_024525	-0.61176	-1.52812	5.02697e-06	0.00422137	tetratricopeptide repeat domain 13
PARP8	PARP8	ILMN_1806651	79668	NM_024615	-0.611214	-1.52754	4.74305e-06	0.00415561	poly(ADP-ribose) polymerase family member 8
MAGED1	MAGED1	ILMN_1762792	9500	NM_001005332	-0.610765	-1.52707	2.90294e-05	0.00897674	MAGE family member D1
SLC38A1	SLC38A1	ILMN_1769911	81539	NM_030674	-0.609852	-1.5261	0.000118104	0.0161953	solute carrier family 38 member 1
SEP6	2016-09-06	ILMN_1661342	23157	NM_145799	-0.609751	-1.526	0.00103534	0.0463426	septin 6
TNRC6C	TNRC6C	ILMN_1746871	57690	NM_018996	-0.609566	-1.5258	2.76251e-05	0.00893441	trinucleotide repeat containing 6C
SLAMF6	SLAMF6	ILMN_2196078	114836	NM_052931	-0.608725	-1.52491	8.307e-05	0.0143562	SLAM family member 6
LOC100131768	NA	ILMN_3206679	NA	XM_001726607	-0.60869	-1.52487	3.65969e-05	0.0098614	NA
THEM4	THEM4	ILMN_1682120	117145	NM_053055	-0.608418	-1.52459	0.000259744	0.0235158	thioesterase superfamily member 4
PIK3IP1	PIK3IP1	ILMN_1719986	113791	NM_052880	-0.608216	-1.52437	0.00108657	0.047603	phosphoinositide-3-kinase interacting protein 1
LOC727909	NA	ILMN_1776709	NA	XM_001126407	-0.608093	-1.52424	8.00276e-05	0.0141808	NA
ZMYM2	ZMYM2	ILMN_2403823	7750	NM_197968	-0.60772	-1.52385	0.000171415	0.0194019	zinc finger MYM-type containing 2
KIR2DS1	KIR2DS1	ILMN_2166812	3806	NM_014512	-0.607609	-1.52373	6.35469e-05	0.0124752	killer cell immunoglobulin like receptor, two Ig domains and short cytoplasmic tail 1
ETS1	ETS1	ILMN_1687538	2113	NM_005238	-0.607292	-1.5234	8.57931e-05	0.0144061	ETS proto-oncogene 1, transcription factor
LOC100128781	NA	ILMN_3191636	NA	XR_038040	-0.60691	-1.52299	0.000129091	0.0166564	NA
LOC374443	LOC374443	ILMN_1708905	374443	NR_002814	-0.606092	-1.52213	5.81722e-05	0.0117617	C-type lectin domain family 2 member D pseudogene
STAT4	STAT4	ILMN_1785202	6775	NM_003151	-0.605939	-1.52197	0.000228143	0.0219463	signal transducer and activator of transcription 4
NA	LOC338620	ILMN_1861057	338620	BC043009	-0.605912	-1.52194	0.00118148	0.0496609	uncharacterized LOC338620
NMT2	NMT2	ILMN_2062620	9397	NM_004808	-0.605891	-1.52192	0.000580246	0.0347937	N-myristoyltransferase 2
PLEKHA1	PLEKHA1	ILMN_2394250	59338	NM_021622	-0.603209	-1.51909	0.000337158	0.0267197	pleckstrin homology domain containing A1
PJA1	PJA1	ILMN_2373566	64219	NM_001032396	-0.602583	-1.51843	1.76166e-05	0.00697154	praja ring finger ubiquitin ligase 1
CUGBP2	CELF2	ILMN_1664170	10659	NM_001025076	-0.601178	-1.51695	0.00109055	0.0476419	CUGBP, Elav-like family member 2
KIAA1128	CCSER2	ILMN_1742124	54462	NM_018999	-0.601145	-1.51692	2.6699e-05	0.00883421	coiled-coil serine rich protein 2
NMT2	NMT2	ILMN_1656378	9397	NM_004808	-0.600304	-1.51604	0.000289285	0.0248849	N-myristoyltransferase 2
FBXO3	FBXO3	ILMN_1729175	26273	NM_033406	-0.600167	-1.51589	0.00119278	0.0498083	F-box protein 3
TCF7	TCF7	ILMN_2367141	6932	NM_201632	-0.599969	-1.51568	0.000673671	0.0376725	transcription factor 7 (T-cell specific, HMG-box)
LOC644353	NA	ILMN_3214625	NA	XR_039901	-0.598577	-1.51422	0.000474003	0.0317649	NA
PAFAH2	PAFAH2	ILMN_1682919	5051	NM_000437	-0.596788	-1.51235	0.000109673	0.0157716	platelet activating factor acetylhydrolase 2
PIK3R1	PIK3R1	ILMN_1760303	5295	NM_181523	-0.595321	-1.51081	0.000664916	0.0375917	phosphoinositide-3-kinase regulatory subunit 1
CAPN7	CAPN7	ILMN_1685022	23473	NM_014296	-0.592156	-1.5075	0.00112821	0.0486675	calpain 7
PIK3C2A	PIK3C2A	ILMN_2166093	5286	NM_002645	-0.591824	-1.50715	0.000997946	0.0455727	phosphatidylinositol-4-phosphate 3-kinase catalytic subunit type 2 alpha
GAB1	GAB1	ILMN_1666910	2549	NM_207123	-0.591824	-1.50715	0.000175629	0.0196441	GRB2 associated binding protein 1
ZFP82	ZFP82	ILMN_1740490	284406	NM_133466	-0.591391	-1.5067	0.000597581	0.0354295	ZFP82 zinc finger protein
C14orf126	DTD2	ILMN_1704238	112487	NM_080664	-0.589946	-1.50519	8.37744e-05	0.0144061	D-tyrosyl-tRNA deacylase 2 (putative)
GLB1L2	GLB1L2	ILMN_2144401	89944	NM_138342	-0.588208	-1.50338	0.000730776	0.0391114	galactosidase beta 1 like 2
SRP54	NA	ILMN_1663149	NA	XM_001131752	-0.587681	-1.50283	8.1996e-05	0.0143562	NA
LOC653125	NA	ILMN_1732291	NA	XM_931236	-0.585711	-1.50078	0.00100313	0.0457228	NA
CUGBP2	CELF2	ILMN_2400947	10659	NM_006561	-0.585465	-1.50052	4.83771e-05	0.0111108	CUGBP, Elav-like family member 2
PCMTD2	PCMTD2	ILMN_1767848	55251	NM_018257	-0.58515	-1.50019	7.8694e-05	0.0141029	protein-L-isoaspartate (D-aspartate) O-methyltransferase domain containing 2
P2RY8	P2RY8	ILMN_1768284	286530	NM_178129	-0.58511	-1.50015	0.000123899	0.0164727	purinergic receptor P2Y8

## Sheet: Downregulated_genes
	Supplementary Table 2-3 List of down-regulated genes
ILMN_GENE	geneSymbol	PROBE_ID	ENTREZ_GENE_ID	ACCESSION	logFC	Fold_Change	P.Value	BH.P.value	GENE_NAME
KLRC2	KLRC2	ILMN_2059357	3822	NM_002260	-1.52713	-2.88212	0.000360107	0.0274796	killer cell lectin like receptor C2
GNLY	GNLY	ILMN_1708779	10578	NM_006433	-1.4826	-2.79452	0.000486822	0.0322133	granulysin
CLEC2D	CLEC2D	ILMN_1711702	29121	NM_013269	-1.41409	-2.66492	0.000243593	0.0226868	C-type lectin domain family 2 member D
MAT2B	MAT2B	ILMN_1680246	27430	NM_013283	-1.40712	-2.65207	0.000175476	0.0196441	methionine adenosyltransferase 2B
KIR2DL3	KIR2DL3	ILMN_2402106	3804	NM_014511	-1.38158	-2.60553	5.15608e-05	0.0115128	killer cell immunoglobulin like receptor, two Ig domains and long cytoplasmic tail 3
KLRC3	KLRC3	ILMN_2386790	3823	NM_002261	-1.30672	-2.47379	3.38258e-07	0.00118315	killer cell lectin like receptor C3
HDC	HDC	ILMN_1792323	3067	NM_002112	-1.30583	-2.47226	0.000162086	0.0188749	histidine decarboxylase
KLRC1	KLRC1	ILMN_2384140	3821	NM_213657	-1.24364	-2.36795	0.000151142	0.0182558	killer cell lectin like receptor C1
LOC645385	LOC645385	ILMN_1720745	NA	XM_928427	-1.23234	-2.34947	0.000801075	0.0409909	NA
SYTL2	SYTL2	ILMN_2240221	54843	NM_032943	-1.22432	-2.33645	2.28223e-07	0.00118315	synaptotagmin like 2
JAK1	JAK1	ILMN_1793384	3716	NM_002227	-1.22186	-2.33247	0.000543753	0.0336945	Janus kinase 1
TARP	TARP	ILMN_1723944	445347	NM_001003806	-1.20426	-2.30419	2.18595e-05	0.00780405	TCR gamma alternate reading frame protein
ABLIM1	ABLIM1	ILMN_2396672	3983	NM_001003407	-1.19455	-2.28873	4.6972e-05	0.0109363	actin binding LIM protein 1
FEZ1	FEZ1	ILMN_1779071	9638	NM_005103	-1.18725	-2.27719	5.79399e-06	0.00464619	fasciculation and elongation protein zeta 1
FCRL3	FCRL3	ILMN_1797428	115352	NM_052939	-1.17952	-2.26502	3.14792e-06	0.00392637	Fc receptor like 3
MATK	MATK	ILMN_1669321	4145	NM_139355	-1.176	-2.25949	3.53988e-06	0.00392637	megakaryocyte-associated tyrosine kinase
CASP8	CASP8	ILMN_1673757	841	NM_001080125	-1.16394	-2.24069	1.31578e-05	0.0063332	caspase 8
FCRL6	FCRL6	ILMN_2074762	343413	NM_001004310	-1.15277	-2.2234	1.47537e-05	0.00637562	Fc receptor like 6
F2R	F2R	ILMN_1742866	2149	NM_001992	-1.13969	-2.20333	3.89795e-06	0.00392637	coagulation factor II thrombin receptor
MATR3	MATR3	ILMN_2411076	9782	NM_199189	-1.13306	-2.19324	0.000218676	0.0217811	matrin 3
KLRA1	KLRA1P	ILMN_1795431	10748	NM_006611	-1.12522	-2.18135	6.40595e-06	0.00472269	killer cell lectin like receptor A1, pseudogene
EIF4G2	EIF4G2	ILMN_2279635	1982	NM_001418	-1.12462	-2.18045	0.000990145	0.0454286	eukaryotic translation initiation factor 4 gamma 2
DYRK1A	DYRK1A	ILMN_1660663	1859	NM_130437	-1.12442	-2.18013	0.000426744	0.029867	dual specificity tyrosine phosphorylation regulated kinase 1A
PDGFD	PDGFD	ILMN_2376859	80310	NM_025208	-1.1006	-2.14444	1.22267e-06	0.00251509	platelet derived growth factor D
LOC389816	LRRC26	ILMN_2249018	389816	NM_001013653	-1.08578	-2.12252	4.5581e-06	0.00415561	leucine rich repeat containing 26
TXK	TXK	ILMN_1741143	7294	NM_003328	-1.08403	-2.11995	6.58813e-06	0.00472269	TXK tyrosine kinase
ZMAT3	ZMAT3	ILMN_1654262	64393	NM_152240	-1.0839	-2.11976	0.000598978	0.0354626	zinc finger matrin-type 3
CD8A	CD8A	ILMN_1760374	925	NM_001768	-1.08269	-2.11798	0.000896571	0.0434644	CD8a molecule
PPIA	PPIA	ILMN_1704529	5478	NM_021130	-1.06839	-2.09709	0.00049748	0.0322965	peptidylprolyl isomerase A
ANKRD36	ANKRD36	ILMN_2382431	375248	NM_198555	-1.06512	-2.09235	5.53835e-05	0.0117502	ankyrin repeat domain 36
KIR3DL1	KIR3DL1	ILMN_1733245	3811	NM_013289	-1.05975	-2.08457	0.00064163	0.0368408	killer cell immunoglobulin like receptor, three Ig domains and long cytoplasmic tail 1
MDFIC	MDFIC	ILMN_1717366	29969	NM_199072	-1.04296	-2.06046	0.000182834	0.0199775	MyoD family inhibitor domain containing
CXCR6	CXCR6	ILMN_1674640	10663	NM_006564	-1.04213	-2.05926	1.95715e-05	0.00740774	chemokine (C-X-C motif) receptor 6
SAMD3	SAMD3	ILMN_2343618	154075	NM_001017373	-1.03648	-2.05122	6.64302e-07	0.00174921	sterile alpha motif domain containing 3
FYN	FYN	ILMN_1781207	2534	NM_153047	-1.03058	-2.04285	0.00101262	0.0457584	FYN proto-oncogene, Src family tyrosine kinase
DOCK9	DOCK9	ILMN_1773413	23348	NM_015296	-1.02846	-2.03985	9.82788e-05	0.0153062	dedicator of cytokinesis 9
CDC42SE2	CDC42SE2	ILMN_1735594	56990	NM_020240	-1.02398	-2.03352	0.000232946	0.0219983	CDC42 small effector 2
NR2C2	NR2C2	ILMN_3251303	7182	NM_003298	-1.02194	-2.03064	6.73367e-05	0.0130715	nuclear receptor subfamily 2 group C member 2
CD160	CD160	ILMN_1742001	11126	NM_007053	-1.01853	-2.02585	3.7135e-06	0.00392637	CD160 molecule
KLRD1	KLRD1	ILMN_1797988	3824	NM_002262	-1.00902	-2.01255	4.72363e-06	0.00415561	killer cell lectin like receptor D1
ABCB1	ABCB1	ILMN_2094875	5243	NM_000927	-1.00622	-2.00865	3.22291e-07	0.00118315	ATP binding cassette subfamily B member 1
SNAP23	SNAP23	ILMN_1687519	8773	NM_003825	-1.00263	-2.00365	0.000165216	0.0190187	synaptosome associated protein 23kDa
SPRYD5	TRIM51	ILMN_1753648	84767	NM_032681	-1.00115	-2.0016	0.00058171	0.0347937	tripartite motif-containing 51
C1orf21	C1orf21	ILMN_1797735	81563	NM_030806	-0.996963	-1.99579	1.36538e-05	0.0063332	chromosome 1 open reading frame 21
PRSS23	PRSS23	ILMN_1797776	11098	NM_007173	-0.995054	-1.99316	0.000157679	0.0187439	protease, serine 23
	RORA	ILMN_1862909	6095	AL832164	-0.977742	-1.96938	3.07707e-06	0.00392637	RAR related orphan receptor A
CDC14B	CDC14B	ILMN_1687074	8555	NM_033331	-0.977001	-1.96837	0.00036597	0.0275274	cell division cycle 14B
MBP	MBP	ILMN_2331544	4155	NM_001025101	-0.975859	-1.96681	0.000815927	0.0414197	myelin basic protein
FBXO32	FBXO32	ILMN_1652280	114907	NM_058229	-0.965524	-1.95277	3.59676e-05	0.0098614	F-box protein 32
SLC38A1	SLC38A1	ILMN_2266948	81539	NM_030674	-0.943832	-1.92363	1.25769e-05	0.00626871	solute carrier family 38 member 1
RASSF5	RASSF5	ILMN_1813795	83593	NM_182665	-0.934752	-1.91156	7.38208e-05	0.013845	Ras association domain family member 5
TRIM23	TRIM23	ILMN_1752741	373	NM_001656	-0.93317	-1.90947	1.62266e-05	0.00661823	tripartite motif containing 23
NKTR	NKTR	ILMN_2330994	4820	NM_001012651	-0.92474	-1.89834	0.000590153	0.0351654	natural killer cell triggering receptor
PDE4D	PDE4D	ILMN_1791483	5144	NM_006203	-0.912682	-1.88254	0.00101227	0.0457584	phosphodiesterase 4D
PTCH1	PTCH1	ILMN_1800331	5727	NM_001083605	-0.908793	-1.87747	1.34902e-06	0.002553	patched 1
EPB41	EPB41	ILMN_1667408	2035	NM_004437	-0.903467	-1.87056	0.000362938	0.0275262	erythrocyte membrane protein band 4.1
KLRG1	KLRG1	ILMN_1658399	10219	NM_005810	-0.903242	-1.87026	9.26976e-06	0.00534843	killer cell lectin like receptor G1
YWHAZ	YWHAZ	ILMN_1669286	7534	NM_003406	-0.903079	-1.87005	0.00068753	0.0378677	tyrosine 3-monooxygenase/tryptophan 5-monooxygenase activation protein zeta
FAM134B	FAM134B	ILMN_2283597	54463	NM_001034850	-0.901967	-1.86861	0.000252027	0.0231031	family with sequence similarity 134 member B
SFMBT1	SFMBT1	ILMN_2391750	51460	NM_001005158	-0.897173	-1.86241	0.000300528	0.025345	Scm-like with four mbt domains 1
KLRF1	KLRF1	ILMN_1685521	51348	NM_016523	-0.890653	-1.85402	3.88984e-06	0.00392637	killer cell lectin like receptor F1
HNRPA1L-2	HNRNPA1P10	ILMN_2220283	664709	NR_002944	-0.877244	-1.83686	1.46704e-05	0.00637562	heterogeneous nuclear ribonucleoprotein A1 pseudogene 10
NFATC3	NFATC3	ILMN_1685810	4775	NM_173163	-0.876768	-1.83626	8.69338e-05	0.0144824	nuclear factor of activated T-cells, cytoplasmic, calcineurin-dependent 3
USP14	USP14	ILMN_2402947	9097	NM_001037334	-0.87666	-1.83612	0.000184831	0.0200108	ubiquitin specific peptidase 14
	YME1L1	ILMN_1821270	10730	AY475219	-0.875993	-1.83527	0.000209164	0.0213276	YME1 like 1 ATPase
SYNE2	SYNE2	ILMN_1754579	23224	NM_015180	-0.874544	-1.83343	7.41209e-06	0.00499206	spectrin repeat containing, nuclear envelope 2
CAMK2N1	CAMK2N1	ILMN_1794863	55450	NM_018584	-0.87414	-1.83292	2.24233e-06	0.00371514	calcium/calmodulin-dependent protein kinase II inhibitor 1
RYK	RYK	ILMN_2363439	6259	NM_002958	-0.870519	-1.82832	2.16596e-05	0.00780405	receptor-like tyrosine kinase
HNRPDL	HNRNPDL	ILMN_1653432	9987	NR_003249	-0.868133	-1.8253	1.17905e-05	0.0059982	heterogeneous nuclear ribonucleoprotein D like
SCML4	SCML4	ILMN_1747436	256380	NM_198081	-0.866008	-1.82261	4.39747e-05	0.0106178	sex comb on midleg-like 4 (Drosophila)
KLF12	KLF12	ILMN_1714444	11278	NM_007249	-0.861847	-1.81736	4.90147e-07	0.00154599	Kruppel-like factor 12
GUSBL1	GUSBP2	ILMN_1780700	387036	NM_001033523	-0.860571	-1.81576	0.000829318	0.041575	glucuronidase, beta pseudogene 2
ARID4B	ARID4B	ILMN_1761334	51742	NM_016374	-0.859941	-1.81496	0.000517341	0.032774	AT-rich interaction domain 4B
ZNF365	ZNF365	ILMN_1658094	22891	NM_014951	-0.8598	-1.81479	0.000224901	0.0219463	zinc finger protein 365
	PSMD6-AS2	ILMN_1913537	100507062	AK023371	-0.859083	-1.81389	9.61423e-05	0.0152793	PSMD6 antisense RNA 2
SRPK2	SRPK2	ILMN_1657451	6733	NM_182691	-0.858141	-1.8127	0.000214047	0.0215927	SRSF protein kinase 2
MLL3	KMT2C	ILMN_1736165	58508	NM_170606	-0.858122	-1.81268	0.00022721	0.0219463	lysine methyltransferase 2C
IL7R	IL7R	ILMN_2342579	3575	NM_002185	-0.85559	-1.8095	7.6911e-05	0.0139826	interleukin 7 receptor
NCALD	NCALD	ILMN_1788538	83988	NM_032041	-0.851275	-1.80409	1.04979e-07	0.00113481	neurocalcin delta
PYHIN1	PYHIN1	ILMN_2395981	149628	NM_152501	-0.850253	-1.80282	4.19401e-06	0.00402488	pyrin and HIN domain family member 1
PASK	PASK	ILMN_1754858	23178	NM_015148	-0.849708	-1.80214	0.000496764	0.0322965	PAS domain containing serine/threonine kinase
SIGLECP3	SIGLEC17P	ILMN_2209551	284367	NR_002804	-0.840569	-1.79076	9.64314e-05	0.0152793	sialic acid binding Ig like lectin 17, pseudogene
PPP2R5C	PPP2R5C	ILMN_1780913	5527	NM_002719	-0.840403	-1.79055	1.83995e-07	0.00118315	protein phosphatase 2 regulatory subunit B', gamma
GLT25D2	COLGALT2	ILMN_1736742	23127	NM_015101	-0.836073	-1.78518	9.14824e-07	0.00223587	collagen beta(1-O)galactosyltransferase 2
MCTP2	MCTP2	ILMN_1792682	55784	NM_018349	-0.832782	-1.78112	0.00025666	0.0233801	multiple C2 domains, transmembrane 2
MAP3K7	MAP3K7	ILMN_2379326	6885	NM_145333	-0.832022	-1.78018	0.000345781	0.0269516	mitogen-activated protein kinase kinase kinase 7
CENTG2	AGAP1	ILMN_1800530	116987	NM_014914	-0.829573	-1.77716	0.000375511	0.0279782	ArfGAP with GTPase domain, ankyrin repeat and PH domain 1
TCF7	TCF7	ILMN_1676470	6932	NM_213648	-0.824548	-1.77098	0.000751661	0.0398208	transcription factor 7 (T-cell specific, HMG-box)
RHOBTB3	RHOBTB3	ILMN_1744949	22836	NM_014899	-0.823704	-1.76994	3.84534e-05	0.00994157	Rho related BTB domain containing 3
IL12RB1	IL12RB1	ILMN_1699908	3594	NM_153701	-0.823127	-1.76924	0.00026906	0.0238385	interleukin 12 receptor subunit beta 1
MRFAP1L1	MRFAP1L1	ILMN_1764827	114932	NM_152301	-0.822613	-1.76861	7.62983e-05	0.0139826	Morf4 family associated protein 1 like 1
CLEC4C	CLEC4C	ILMN_1665457	170482	NM_130441	-0.821532	-1.76728	0.000124994	0.0164727	C-type lectin domain family 4 member C
SMA5	SMA5	ILMN_1662483	11042	NM_021036	-0.819157	-1.76438	0.000997407	0.0455727	glucuronidase, beta pseudogene
GPR89A	GPR89B	ILMN_2116594	51463	NM_016334	-0.814148	-1.75826	1.53372e-05	0.00642154	G protein-coupled receptor 89B
MDM1	MDM1	ILMN_1736460	56890	NM_017440	-0.810799	-1.75418	6.57626e-06	0.00472269	Mdm1 nuclear protein
G3BP1	G3BP1	ILMN_2357809	10146	NM_198395	-0.809861	-1.75304	0.000193634	0.0204036	G3BP stress granule assembly factor 1
FAM108B1	ABHD17B	ILMN_2374362	51104	NM_016014	-0.80647	-1.74893	4.51627e-05	0.0107374	abhydrolase domain containing 17B
DYRK2	DYRK2	ILMN_1794588	8445	NM_003583	-0.805457	-1.7477	7.14977e-05	0.0136399	dual specificity tyrosine phosphorylation regulated kinase 2
KIR2DS3	KIR2DS3	ILMN_1793525	3808	NM_012313	-0.803488	-1.74532	2.85149e-05	0.00893441	killer cell immunoglobulin like receptor, two Ig domains and short cytoplasmic tail 3
NEK7	NEK7	ILMN_1758548	140609	NM_133494	-0.802947	-1.74466	0.000387828	0.0285138	NIMA related kinase 7
TULP4	TULP4	ILMN_2337740	56995	NM_020245	-0.801878	-1.74337	0.000229151	0.0219463	tubby like protein 4
SERPINB9	SERPINB9	ILMN_1742052	5272	NM_004155	-0.800466	-1.74166	0.000519421	0.0328102	serpin peptidase inhibitor, clade B (ovalbumin), member 9
HNRNPA1	HNRNPA1	ILMN_1663447	3178	NM_031157	-0.798468	-1.73925	0.000182576	0.0199775	heterogeneous nuclear ribonucleoprotein A1
AUTS2	AUTS2	ILMN_1749081	26053	NM_015570	-0.796153	-1.73646	1.49251e-05	0.00637562	autism susceptibility candidate 2
LOC400464	LOC400464	ILMN_1786168	400464	NM_001013670	-0.793192	-1.7329	8.23893e-05	0.0143562	uncharacterized LOC400464
LINS1	LINS1	ILMN_1669624	55180	NM_181739	-0.792967	-1.73263	0.000908326	0.0436735	lines homolog 1
	TXLNG	ILMN_1882000	55787	U56251	-0.792853	-1.7325	0.000743801	0.0396304	taxilin gamma
TNFRSF21	TNFRSF21	ILMN_1699695	27242	NM_014452	-0.792515	-1.73209	0.000218133	0.0217811	tumor necrosis factor receptor superfamily member 21
TGFBR3	TGFBR3	ILMN_1784287	7049	NM_003243	-0.792053	-1.73154	3.57536e-05	0.0098614	transforming growth factor beta receptor III
MACF1	MACF1	ILMN_1737935	23499	NM_012090	-0.791297	-1.73063	0.000209089	0.0213276	microtubule-actin crosslinking factor 1
PDE7A	PDE7A	ILMN_2278819	5150	NM_002603	-0.788713	-1.72753	0.000230067	0.0219463	phosphodiesterase 7A
AKIRIN1	AKIRIN1	ILMN_1679383	79647	NM_024595	-0.788646	-1.72745	5.58066e-05	0.0117617	akirin 1
POLR2J4	POLR2J4	ILMN_1754584	84820	NR_003655	-0.787406	-1.72597	0.000115749	0.0161953	polymerase (RNA) II subunit J4, pseudogene
CCT6A	CCT6A	ILMN_1719611	908	NM_001762	-0.786721	-1.72515	0.00103638	0.0463452	chaperonin containing TCP1 subunit 6A
COL6A2	COL6A2	ILMN_1809928	1292	NM_001849	-0.785415	-1.72359	1.49245e-05	0.00637562	collagen type VI alpha 2
CD96	CD96	ILMN_2415786	10225	NM_005816	-0.781436	-1.71884	9.89004e-05	0.0153062	CD96 molecule
PTGDR	PTGDR	ILMN_1706268	5729	NM_000953	-0.776744	-1.71326	0.000362648	0.0275262	prostaglandin D2 receptor (DP)
KIR2DL5A	KIR2DL5A	ILMN_2415653	57292	NM_020535	-0.773699	-1.70965	0.000264365	0.0235995	killer cell immunoglobulin like receptor, two Ig domains and long cytoplasmic tail 5A
PPM1B	PPM1B	ILMN_2377210	5495	NM_177969	-0.772581	-1.70832	0.000133602	0.0168402	protein phosphatase, Mg2+/Mn2+ dependent 1B
YPEL1	YPEL1	ILMN_1795338	29799	NM_013313	-0.771896	-1.70751	2.63444e-05	0.00883421	yippee like 1
KIAA1324L	KIAA1324L	ILMN_1652371	222223	NM_152748	-0.771558	-1.70711	9.22794e-05	0.0150989	KIAA1324-like
GPM6B	GPM6B	ILMN_1735438	2824	NM_001001995	-0.76871	-1.70375	4.09633e-05	0.0103586	glycoprotein M6B
MAEA	MAEA	ILMN_1689257	10296	NM_001017405	-0.767738	-1.7026	0.000418522	0.0295152	macrophage erythroblast attacher
S1PR5	S1PR5	ILMN_2073184	53637	NM_030760	-0.766397	-1.70102	0.000186741	0.0201254	sphingosine-1-phosphate receptor 5
FAM3C	FAM3C	ILMN_2368773	10447	NM_001040020	-0.765795	-1.70031	0.000314331	0.0257294	family with sequence similarity 3 member C
SLC7A6	SLC7A6	ILMN_2324561	9057	NM_001076785	-0.763628	-1.69776	0.000753374	0.0398208	solute carrier family 7 member 6
	HIPK2	ILMN_1912737	28996	BX538009	-0.76097	-1.69463	0.000335577	0.0266837	homeodomain interacting protein kinase 2
KIR2DS4	KIR2DS4	ILMN_1772787	3809	NM_012314	-0.760405	-1.69397	3.69609e-05	0.0098614	killer cell immunoglobulin like receptor, two Ig domains and short cytoplasmic tail 4
XPOT	XPOT	ILMN_2188374	11260	NM_007235	-0.758509	-1.69174	9.68844e-05	0.0152793	exportin, tRNA
ZBTB16	ZBTB16	ILMN_2402817	7704	NM_001018011	-0.758149	-1.69132	1.48388e-05	0.00637562	zinc finger and BTB domain containing 16
CRY1	CRY1	ILMN_1760593	1407	NM_004075	-0.753268	-1.68561	0.000117552	0.0161953	cryptochrome circadian clock 1
TNIK	TNIK	ILMN_1687442	23043	NM_015028	-0.751677	-1.68375	0.000774838	0.0403735	TRAF2 and NCK interacting kinase
ZNF30	ZNF30	ILMN_1728230	90075	NM_001099437	-0.749604	-1.68133	0.000103801	0.0155906	zinc finger protein 30
PLEKHA3	PLEKHA3	ILMN_1797576	65977	NM_019091	-0.74568	-1.67676	0.000347125	0.0270118	pleckstrin homology domain containing A3
USP22	USP22	ILMN_1666609	23326	NM_015276	-0.745219	-1.67623	0.000123734	0.0164727	ubiquitin specific peptidase 22
FAM190B	CCSER2	ILMN_2129388	54462	NM_018999	-0.744027	-1.67484	5.19935e-06	0.00424123	coiled-coil serine rich protein 2
GNG2	GNG2	ILMN_1807925	54331	NM_053064	-0.73971	-1.66984	0.000905384	0.0436735	G protein subunit gamma 2
CEP120	CEP120	ILMN_1781077	153241	NM_153223	-0.736366	-1.66597	0.00108269	0.047518	centrosomal protein 120kDa
SPTBN1	SPTBN1	ILMN_1661335	6711	NM_003128	-0.736066	-1.66563	0.00021132	0.0214549	spectrin beta, non-erythrocytic 1
SLAIN1	SLAIN1	ILMN_2397795	122060	NM_144595	-0.735388	-1.66485	5.27103e-05	0.0116695	SLAIN motif family member 1
BCL11B	BCL11B	ILMN_1665761	64919	NM_138576	-0.735284	-1.66473	2.94681e-05	0.00901842	B-cell CLL/lymphoma 11B
ATPGD1	CARNS1	ILMN_1725746	57571	NM_020811	-0.732311	-1.6613	0.000527056	0.0332399	carnosine synthase 1
FBXO3	FBXO3	ILMN_1749641	26273	NM_012175	-0.732127	-1.66109	2.69251e-05	0.00884639	F-box protein 3
SH3KBP1	SH3KBP1	ILMN_1652650	30011	NM_001024666	-0.728792	-1.65725	0.00106866	0.0470329	SH3-domain kinase binding protein 1
ENPP3	ENPP3	ILMN_1749131	5169	NM_005021	-0.728126	-1.65649	0.000330185	0.0263435	ectonucleotide pyrophosphatase/phosphodiesterase 3
DCAF16	DCAF16	ILMN_1753440	54876	NM_017741	-0.727868	-1.65619	9.6128e-05	0.0152793	DDB1 and CUL4 associated factor 16
LOC100134301	LOC100134301	ILMN_3241856	100134301	XM_001720715	-0.726157	-1.65423	1.02633e-05	0.00571269	uncharacterized LOC100134301
PPP2R2B	PPP2R2B	ILMN_1660732	5521	NM_181676	-0.725608	-1.6536	9.11726e-05	0.0150298	protein phosphatase 2 regulatory subunit B, beta
PACSIN1	PACSIN1	ILMN_1751020	29993	NM_020804	-0.725239	-1.65317	0.000299704	0.0253207	protein kinase C and casein kinase substrate in neurons 1
PDCD4	PDCD4	ILMN_1768004	27250	NM_145341	-0.724379	-1.65219	0.000459257	0.0311741	programmed cell death 4 (neoplastic transformation inhibitor)
GALNT12	GALNT12	ILMN_1735157	79695	NM_024642	-0.723745	-1.65146	6.65491e-07	0.00174921	polypeptide N-acetylgalactosaminyltransferase 12
SON	SON	ILMN_2323302	6651	NM_138927	-0.72182	-1.64926	0.000552943	0.0339751	SON DNA binding protein
MAP2K6	MAP2K6	ILMN_1697729	5608	NM_002758	-0.720326	-1.64755	0.000118037	0.0161953	mitogen-activated protein kinase kinase 6
FXN	FXN	ILMN_1774826	2395	NM_000144	-0.72012	-1.64732	9.51248e-05	0.0152793	frataxin
SCD5	SCD5	ILMN_2237428	79966	NM_001037582	-0.717107	-1.64388	0.000578097	0.0347534	stearoyl-CoA desaturase 5
SKAP1	SKAP1	ILMN_2335604	8631	NM_001075099	-0.716723	-1.64345	8.61714e-05	0.0144061	src kinase associated phosphoprotein 1
AP1GBP1	SYNRG	ILMN_1805247	11276	NM_007247	-0.714616	-1.64105	2.1486e-05	0.00780405	synergin, gamma
NFX1	NFX1	ILMN_1698402	4799	NM_147133	-0.714371	-1.64077	0.000996193	0.0455727	nuclear transcription factor, X-box binding 1
HOPX	HOPX	ILMN_2316236	84525	NM_139212	-0.713758	-1.64007	0.00012106	0.0162716	HOP homeobox
GZMK	GZMK	ILMN_1710734	3003	NM_002104	-0.713058	-1.63928	7.18326e-05	0.0136488	granzyme K
CASP2	CASP2	ILMN_2296057	835	NM_032982	-0.707366	-1.63282	0.000263797	0.0235995	caspase 2
SESN1	SESN1	ILMN_1800626	27244	NM_014454	-0.705417	-1.63062	3.22542e-05	0.00947834	sestrin 1
ZNF831	ZNF831	ILMN_1658016	128611	NM_178457	-0.701274	-1.62594	3.17259e-06	0.00392637	zinc finger protein 831
EOMES	EOMES	ILMN_1760509	8320	NM_005442	-0.70106	-1.6257	0.000508313	0.032548	eomesodermin
SATB1	SATB1	ILMN_1690646	6304	NM_002971	-0.698542	-1.62286	0.000229153	0.0219463	SATB homeobox 1
ZNF429	ZNF429	ILMN_1695413	353088	NM_001001415	-0.697123	-1.62127	0.00042494	0.0298144	zinc finger protein 429
ZFX	ZFX	ILMN_1687484	7543	NM_003410	-0.696556	-1.62063	0.000806741	0.0411299	zinc finger protein, X-linked
SLC4A7	SLC4A7	ILMN_1808354	9497	NM_003615	-0.695288	-1.61921	0.000988683	0.0454141	solute carrier family 4 member 7
FBXL17	FBXL17	ILMN_1715901	64839	NM_022824	-0.694964	-1.61884	0.00031316	0.025678	F-box and leucine-rich repeat protein 17
LOC595101	SMG1P5	ILMN_2200562	595101	NR_002453	-0.693846	-1.61759	0.000147111	0.0180313	SMG1 pseudogene 5
KLRB1	KLRB1	ILMN_2079655	3820	NM_002258	-0.692829	-1.61645	3.11561e-05	0.00932224	killer cell lectin like receptor B1
COLQ	COLQ	ILMN_2329114	8292	NM_080539	-0.692523	-1.61611	8.58998e-05	0.0144061	collagen-like tail subunit (single strand of homotrimer) of asymmetric acetylcholinesterase
BRWD1	BRWD1	ILMN_1761915	54014	NM_018963	-0.691132	-1.61455	0.000228241	0.0219463	bromodomain and WD repeat domain containing 1
TAS2R45	TAS2R45	ILMN_1702830	259291	NM_176886	-0.689534	-1.61276	0.00031218	0.0256741	taste 2 receptor member 45
SLFN13	SLFN13	ILMN_2215862	146857	NM_144682	-0.687714	-1.61073	0.000557637	0.0339986	schlafen family member 13
PAG1	PAG1	ILMN_1673640	55824	NM_018440	-0.685814	-1.60861	0.00118878	0.049773	phosphoprotein membrane anchor with glycosphingolipid microdomains 1
ARL4C	ARL4C	ILMN_1768391	10123	NM_005737	-0.683644	-1.60619	6.0151e-06	0.00472269	ADP ribosylation factor like GTPase 4C
ENPP4	ENPP4	ILMN_1781761	22875	NM_014936	-0.6787	-1.6007	0.000587223	0.0350349	ectonucleotide pyrophosphatase/phosphodiesterase 4 (putative)
ZNF84	ZNF84	ILMN_3223798	7637	NM_003428	-0.678531	-1.60051	0.000557216	0.0339986	zinc finger protein 84
CLIP4	CLIP4	ILMN_1759792	79745	NM_024692	-0.677797	-1.5997	0.000619231	0.0362492	CAP-Gly domain containing linker protein family member 4
CEP78	CEP78	ILMN_3185161	84131	NM_001098802	-0.677364	-1.59922	1.53203e-05	0.00642154	centrosomal protein 78kDa
GK5	GK5	ILMN_1673892	256356	NM_001039547	-0.675167	-1.59678	0.000294549	0.0250762	glycerol kinase 5 (putative)
ZNF286A	ZNF286A	ILMN_1663858	57335	NM_020652	-0.674479	-1.59602	8.08293e-06	0.00528486	zinc finger protein 286A
SLC12A2	SLC12A2	ILMN_1720996	6558	NM_001046	-0.672947	-1.59433	9.9034e-05	0.0153062	solute carrier family 12 member 2
GOLGA7	GOLGA7	ILMN_2268921	51125	NM_016099	-0.672406	-1.59373	1.06736e-05	0.00576943	golgin A7
EIF4B	EIF4B	ILMN_1655497	1975	NM_001417	-0.669779	-1.59083	6.00237e-05	0.0119816	eukaryotic translation initiation factor 4B
POT1	POT1	ILMN_2327203	25913	NR_003104	-0.664362	-1.58487	0.000686061	0.0378677	protection of telomeres 1
FAM10A7	ST13P7	ILMN_2080158	155019	NR_002198	-0.662893	-1.58325	0.00055389	0.0339782	suppression of tumorigenicity 13 (colon carcinoma) (Hsp70 interacting protein) pseudogene 7
SNTB2	SNTB2	ILMN_1786766	6645	NM_006750	-0.660171	-1.58027	0.000285411	0.0246862	syntrophin beta 2
PRKCH	PRKCH	ILMN_1780898	5583	NM_006255	-0.660129	-1.58022	3.58019e-06	0.00392637	protein kinase C eta
MIA3	MIA3	ILMN_2312906	375056	NM_198551	-0.657856	-1.57774	0.000100716	0.0154209	melanoma inhibitory activity family member 3
PTPRC	PTPRC	ILMN_1804279	5788	NM_002838	-0.657046	-1.57685	0.00111392	0.0484837	protein tyrosine phosphatase, receptor type C
CTBP1	CTBP1	ILMN_2278235	1487	NM_001012614	-0.657	-1.5768	0.000656579	0.0373664	C-terminal binding protein 1
ZNF827	ZNF827	ILMN_1727574	152485	NM_178835	-0.656918	-1.57671	0.000161253	0.0188749	zinc finger protein 827
NCR3	NCR3	ILMN_2044471	259197	NM_147130	-0.65688	-1.57667	0.000402937	0.0290066	natural cytotoxicity triggering receptor 3
VPS13A	VPS13A	ILMN_2414826	23230	NM_033305	-0.655208	-1.57484	0.00035299	0.0271998	vacuolar protein sorting 13 homolog A (S. cerevisiae)
KIAA2026	KIAA2026	ILMN_2106227	158358	NM_001017969	-0.65498	-1.57459	0.00117241	0.0494819	KIAA2026
TCERG1	TCERG1	ILMN_2398039	10915	NM_006706	-0.654614	-1.57419	0.00089084	0.0434213	transcription elongation regulator 1
ENPP5	ENPP5	ILMN_1660727	59084	NM_021572	-0.654487	-1.57406	0.000133834	0.0168402	ectonucleotide pyrophosphatase/phosphodiesterase 5 (putative)
KLHL3	KLHL3	ILMN_1770641	26249	NM_017415	-0.653306	-1.57277	0.000559624	0.0340759	kelch like family member 3
ZBTB38	ZBTB38	ILMN_2248863	253461	NM_001080412	-0.653163	-1.57261	0.000302349	0.025363	zinc finger and BTB domain containing 38
NR2C1	NR2C1	ILMN_1774382	7181	NM_003297	-0.65288	-1.5723	0.000296507	0.0251404	nuclear receptor subfamily 2 group C member 1
ERBB2IP	ERBIN	ILMN_1805024	55914	NM_018695	-0.649254	-1.56836	0.000226092	0.0219463	erbb2 interacting protein
RAD17	RAD17	ILMN_2321634	5884	NM_133340	-0.646004	-1.56483	0.000343502	0.0269515	RAD17 checkpoint clamp loader component
CD2	CD2	ILMN_1695025	914	NM_001767	-0.642479	-1.56101	8.26347e-06	0.00528486	CD2 molecule
TRIM61	TRIM61	ILMN_1706265	391712	NM_001012414	-0.641944	-1.56043	0.000436612	0.0302077	tripartite motif containing 61
FGF9	FGF9	ILMN_1762531	2254	NM_002010	-0.640838	-1.55923	1.64864e-05	0.0066667	fibroblast growth factor 9
SMC4	SMC4	ILMN_2251804	10051	NM_001002800	-0.640298	-1.55865	0.00010632	0.0156644	structural maintenance of chromosomes 4
	LOC286437	ILMN_1817377	286437	CD172175	-0.639354	-1.55763	0.000690621	0.0378779	uncharacterized LOC286437
TRPC1	TRPC1	ILMN_1674380	7220	NM_003304	-0.639291	-1.55756	0.000915027	0.0437733	transient receptor potential cation channel subfamily C member 1
ERP44	ERP44	ILMN_1772156	23071	NM_015051	-0.63855	-1.55676	0.000406969	0.0291735	endoplasmic reticulum protein 44
RPS23	RPS23	ILMN_1772459	6228	NM_001025	-0.637641	-1.55578	1.01067e-05	0.00571269	ribosomal protein S23
	SLC16A7	ILMN_1847494	9194	BG434785	-0.637145	-1.55525	0.000891149	0.0434213	solute carrier family 16 member 7
RAE1	RAE1	ILMN_1690259	8480	NM_003610	-0.635722	-1.55372	8.19099e-05	0.0143562	ribonucleic acid export 1
D4S234E	NSG1	ILMN_1772627	27065	NM_001040101	-0.635517	-1.55349	0.000919649	0.0438613	neuron specific gene family member 1
PLEKHA1	PLEKHA1	ILMN_1662839	59338	NM_001001974	-0.635087	-1.55303	0.000218638	0.0217811	pleckstrin homology domain containing A1
SCP2	SCP2	ILMN_1694776	6342	NM_002979	-0.634996	-1.55293	0.000902606	0.0436201	sterol carrier protein 2
REV3L	REV3L	ILMN_2199947	5980	NM_002912	-0.634799	-1.55272	0.00114613	0.048852	REV3 like, DNA directed polymerase zeta catalytic subunit
SNORD31	SNORD31	ILMN_2072391	9298	NR_002560	-0.63452	-1.55242	0.000298345	0.025251	small nucleolar RNA, C/D box 31
PARP15	PARP15	ILMN_1776778	165631	NM_152615	-0.634492	-1.55239	0.000906913	0.0436735	poly(ADP-ribose) polymerase family member 15
SNRPD3	SNRPD3	ILMN_1794599	6634	NM_004175	-0.633903	-1.55176	0.000112194	0.0159403	small nuclear ribonucleoprotein D3 polypeptide
OR7E156P	OR7E156P	ILMN_2090351	283491	NR_002171	-0.633727	-1.55157	0.000619834	0.0362492	olfactory receptor family 7 subfamily E member 156 pseudogene
VPS13C	VPS13C	ILMN_1809582	54832	NM_017684	-0.633085	-1.55088	0.000955342	0.0447055	vacuolar protein sorting 13 homolog C (S. cerevisiae)
CLDND2	CLDND2	ILMN_2077680	125875	NM_152353	-0.632544	-1.5503	0.000412349	0.0293298	claudin domain containing 2
PRF1	PRF1	ILMN_1740633	5551	NM_005041	-0.631781	-1.54948	0.000724579	0.0388899	perforin 1
PPP1R8	PPP1R8	ILMN_2321485	5511	NM_014110	-0.631019	-1.54866	0.00114058	0.048852	protein phosphatase 1 regulatory subunit 8
MYST4	KAT6B	ILMN_1698441	23522	NM_012330	-0.631008	-1.54865	0.000139744	0.0173988	lysine acetyltransferase 6B
FAM55C	NXPE3	ILMN_1814924	91775	NM_145037	-0.629755	-1.5473	0.00066241	0.0375779	neurexophilin and PC-esterase domain family member 3
MCOLN2	MCOLN2	ILMN_1660462	255231	NM_153259	-0.629178	-1.54668	0.000829533	0.041575	mucolipin 2
C3orf63	FAM208A	ILMN_1661409	23272	NM_015224	-0.627578	-1.54497	0.000478231	0.031976	family with sequence similarity 208 member A
SMAP1	SMAP1	ILMN_2363231	60682	NM_021940	-0.62717	-1.54453	0.000494757	0.0322965	small ArfGAP 1
ZNF121	ZNF121	ILMN_1766613	7675	NM_001008727	-0.626411	-1.54372	0.00098391	0.0453454	zinc finger protein 121
HLTF	HLTF	ILMN_1798588	6596	NM_003071	-0.623521	-1.54063	0.000447557	0.0305994	helicase-like transcription factor
SCAMP5	SCAMP5	ILMN_1753345	192683	NM_138967	-0.62197	-1.53898	0.000136998	0.0171472	secretory carrier membrane protein 5
LOC85389	SNORD14C	ILMN_1754332	85389	NR_001453	-0.621519	-1.53849	0.00057912	0.0347707	small nucleolar RNA, C/D box 14C
NLRC3	NLRC3	ILMN_3234784	197358	NM_178844	-0.616909	-1.53359	5.43023e-05	0.0116695	NLR family, CARD domain containing 3
RUNX3	RUNX3	ILMN_1787461	864	NM_004350	-0.61598	-1.5326	1.07311e-05	0.00576943	runt related transcription factor 3
DPAGT1	DPAGT1	ILMN_1744244	1798	NM_001382	-0.61381	-1.5303	0.000413488	0.0293298	dolichyl-phosphate N-acetylglucosaminephosphotransferase 1
POLR1E	POLR1E	ILMN_1678934	64425	NM_022490	-0.613664	-1.53014	4.43486e-05	0.0106509	polymerase (RNA) I subunit E
RAP1GDS1	RAP1GDS1	ILMN_1687724	5910	NM_021159	-0.612667	-1.52908	0.000634663	0.036708	Rap1 GTPase-GDP dissociation stimulator 1
PITPNC1	PITPNC1	ILMN_1738796	26207	NM_012417	-0.612104	-1.52849	0.000663258	0.0375809	phosphatidylinositol transfer protein, cytoplasmic 1
TIGIT	TIGIT	ILMN_2125017	201633	NM_173799	-0.611806	-1.52817	0.000863792	0.042661	T-cell immunoreceptor with Ig and ITIM domains
TTC13	TTC13	ILMN_1745573	79573	NM_024525	-0.61176	-1.52812	5.02697e-06	0.00422137	tetratricopeptide repeat domain 13
PARP8	PARP8	ILMN_1806651	79668	NM_024615	-0.611214	-1.52754	4.74305e-06	0.00415561	poly(ADP-ribose) polymerase family member 8
MAGED1	MAGED1	ILMN_1762792	9500	NM_001005332	-0.610765	-1.52707	2.90294e-05	0.00897674	MAGE family member D1
2016-09-06	SEP6	ILMN_1661342	23157	NM_145799	-0.609751	-1.526	0.00103534	0.0463426	septin 6
TNRC6C	TNRC6C	ILMN_1746871	57690	NM_018996	-0.609566	-1.5258	2.76251e-05	0.00893441	trinucleotide repeat containing 6C
SLAMF6	SLAMF6	ILMN_2196078	114836	NM_052931	-0.608725	-1.52491	8.307e-05	0.0143562	SLAM family member 6
THEM4	THEM4	ILMN_1682120	117145	NM_053055	-0.608418	-1.52459	0.000259744	0.0235158	thioesterase superfamily member 4
PIK3IP1	PIK3IP1	ILMN_1719986	113791	NM_052880	-0.608216	-1.52437	0.00108657	0.047603	phosphoinositide-3-kinase interacting protein 1
ZMYM2	ZMYM2	ILMN_2403823	7750	NM_197968	-0.60772	-1.52385	0.000171415	0.0194019	zinc finger MYM-type containing 2
KIR2DS1	KIR2DS1	ILMN_2166812	3806	NM_014512	-0.607609	-1.52373	6.35469e-05	0.0124752	killer cell immunoglobulin like receptor, two Ig domains and short cytoplasmic tail 1
ETS1	ETS1	ILMN_1687538	2113	NM_005238	-0.607292	-1.5234	8.57931e-05	0.0144061	ETS proto-oncogene 1, transcription factor
LOC374443	LOC374443	ILMN_1708905	374443	NR_002814	-0.606092	-1.52213	5.81722e-05	0.0117617	C-type lectin domain family 2 member D pseudogene
STAT4	STAT4	ILMN_1785202	6775	NM_003151	-0.605939	-1.52197	0.000228143	0.0219463	signal transducer and activator of transcription 4
	LOC338620	ILMN_1861057	338620	BC043009	-0.605912	-1.52194	0.00118148	0.0496609	uncharacterized LOC338620
NMT2	NMT2	ILMN_2062620	9397	NM_004808	-0.605891	-1.52192	0.000580246	0.0347937	N-myristoyltransferase 2
PJA1	PJA1	ILMN_2373566	64219	NM_001032396	-0.602583	-1.51843	1.76166e-05	0.00697154	praja ring finger ubiquitin ligase 1
CUGBP2	CELF2	ILMN_1664170	10659	NM_001025076	-0.601178	-1.51695	0.00109055	0.0476419	CUGBP, Elav-like family member 2
PAFAH2	PAFAH2	ILMN_1682919	5051	NM_000437	-0.596788	-1.51235	0.000109673	0.0157716	platelet activating factor acetylhydrolase 2
PIK3R1	PIK3R1	ILMN_1760303	5295	NM_181523	-0.595321	-1.51081	0.000664916	0.0375917	phosphoinositide-3-kinase regulatory subunit 1
CAPN7	CAPN7	ILMN_1685022	23473	NM_014296	-0.592156	-1.5075	0.00112821	0.0486675	calpain 7
PIK3C2A	PIK3C2A	ILMN_2166093	5286	NM_002645	-0.591824	-1.50715	0.000997946	0.0455727	phosphatidylinositol-4-phosphate 3-kinase catalytic subunit type 2 alpha
GAB1	GAB1	ILMN_1666910	2549	NM_207123	-0.591824	-1.50715	0.000175629	0.0196441	GRB2 associated binding protein 1
ZFP82	ZFP82	ILMN_1740490	284406	NM_133466	-0.591391	-1.5067	0.000597581	0.0354295	ZFP82 zinc finger protein
C14orf126	DTD2	ILMN_1704238	112487	NM_080664	-0.589946	-1.50519	8.37744e-05	0.0144061	D-tyrosyl-tRNA deacylase 2 (putative)
GLB1L2	GLB1L2	ILMN_2144401	89944	NM_138342	-0.588208	-1.50338	0.000730776	0.0391114	galactosidase beta 1 like 2
PCMTD2	PCMTD2	ILMN_1767848	55251	NM_018257	-0.58515	-1.50019	7.8694e-05	0.0141029	protein-L-isoaspartate (D-aspartate) O-methyltransferase domain containing 2
P2RY8	P2RY8	ILMN_1768284	286530	NM_178129	-0.58511	-1.50015	0.000123899	0.0164727	purinergic receptor P2Y8

## Sheet: Upregulated_probes
	Supplementary Table 2-4 List of up-regulated probes
ILMN_GENE	geneSymbol	PROBE_ID	ENTREZ_GENE_ID	ACCESSION	logFC	Fold_Change	P.Value	BH.P.value	GENE_NAME
IFI27	IFI27	ILMN_2058782	3429	NM_005532	2.80007	6.96474	0.000784555	0.040567	interferon, alpha-inducible protein 27
LOC653600	NA	ILMN_1693262	NA	XM_928349	2.42058	5.35387	0.000141799	0.0175623	NA
OLFM4	OLFM4	ILMN_2116877	10562	NM_006418	2.10202	4.2931	0.000707312	0.0384737	olfactomedin 4
DEFA1B	DEFA1B	ILMN_2102721	728358	NM_001042500	2.09091	4.26016	0.000195474	0.0205261	defensin alpha 1B
DEFA1B	DEFA1B	ILMN_1679357	728358	NM_001042500	2.05774	4.16335	0.000183831	0.019994	defensin alpha 1B
DEFA3	DEFA3	ILMN_2165289	1668	NM_005217	1.97216	3.92356	0.00015143	0.0182558	defensin alpha 3
DEFA1B	DEFA1B	ILMN_1725661	728358	NM_001042500	1.9636	3.90034	0.000161578	0.0188749	defensin alpha 1B
CEACAM6	CEACAM6	ILMN_1712522	4680	NM_002483	1.93816	3.83217	0.00027228	0.0239456	carcinoembryonic antigen related cell adhesion molecule 6
ELANE	ELANE	ILMN_1706635	1991	NM_001972	1.90416	3.7429	0.000219577	0.0218248	elastase, neutrophil expressed
CTSG	CTSG	ILMN_1680424	1511	NM_001911	1.80757	3.50053	0.000503653	0.0325092	cathepsin G
RNASE3	RNASE3	ILMN_2113126	6037	NM_002935	1.69872	3.24612	4.61895e-05	0.0109266	ribonuclease A family member 3
DEFA1	DEFA1	ILMN_2193213	1667	NM_004084	1.6603	3.16083	0.000190344	0.0201813	defensin alpha 1
SLPI	SLPI	ILMN_2114720	6590	NM_003064	1.57309	2.97542	0.000107978	0.0157189	secretory leukocyte peptidase inhibitor
BPI	BPI	ILMN_1766736	671	NM_001725	1.52463	2.87714	0.000688925	0.0378779	bactericidal/permeability-increasing protein
RNASE2	RNASE2	ILMN_1730628	6036	NM_002934	1.48343	2.79613	4.5626e-08	0.0010696	ribonuclease A family member 2
LOC643332	NA	ILMN_3202002	NA	XR_016287	1.41324	2.66335	8.56265e-06	0.00528486	NA
IFITM3	IFITM3	ILMN_1805750	10410	NM_021034	1.41086	2.65895	0.000126851	0.0165526	interferon induced transmembrane protein 3
TACSTD2	TACSTD2	ILMN_1739001	4070	NM_002353	1.39559	2.63096	0.000769457	0.0402705	tumor-associated calcium signal transducer 2
TCN2	TCN2	ILMN_1740572	6948	NM_000355	1.36681	2.579	3.50104e-07	0.00118315	transcobalamin 2
ARG1	ARG1	ILMN_1812281	383	NM_000045	1.33504	2.52282	0.000490918	0.0322965	arginase 1
LCN2	LCN2	ILMN_1692223	3934	NM_005564	1.30057	2.46327	0.000200504	0.0206672	lipocalin 2
C1QB	C1QB	ILMN_1796409	713	NM_000491	1.29372	2.45159	0.000464391	0.0313427	complement component 1, q subcomponent, B chain
COL17A1	COL17A1	ILMN_1651282	1308	NM_000494	1.2615	2.39745	0.000119525	0.0161953	collagen type XVII alpha 1
ADM	ADM	ILMN_1708934	133	NM_001124	1.26088	2.39641	9.47344e-05	0.0152793	adrenomedullin
ABCA13	ABCA13	ILMN_1704579	154664	NM_152701	1.25917	2.39358	0.000762975	0.0401087	ATP binding cassette subfamily A member 13
HP	HP	ILMN_1812433	3240	NM_005143	1.25441	2.3857	0.000179549	0.0198574	haptoglobin
BEX1	BEX1	ILMN_2234697	55859	NM_018476	1.22681	2.34049	0.000187971	0.0201476	brain expressed X-linked 1
MYL9	MYL9	ILMN_1675062	10398	NM_006097	1.21269	2.31769	4.90082e-05	0.0112013	myosin light chain 9
MS4A4A	MS4A4A	ILMN_2370336	51338	NM_148975	1.18567	2.2747	0.000386492	0.0285138	membrane spanning 4-domains A4A
ORM1	ORM1	ILMN_1696584	5004	NM_000607	1.18537	2.27422	0.00091802	0.0438297	orosomucoid 1
LTBR	LTBR	ILMN_1667476	4055	NM_002342	1.18087	2.26713	5.41797e-09	0.000256335	lymphotoxin beta receptor
CEACAM1	CEACAM1	ILMN_1716815	634	NM_001024912	1.17784	2.26238	0.000425362	0.0298144	carcinoembryonic antigen related cell adhesion molecule 1
C19orf59	MCEMP1	ILMN_1762713	199675	NM_174918	1.15104	2.22074	2.58338e-07	0.00118315	mast cell-expressed membrane protein 1
LOC653610	NA	ILMN_1695435	NA	XM_928387	1.10897	2.15692	0.00088357	0.0432301	NA
HLA-C	HLA-C	ILMN_2150787	3107	NM_002117	1.05169	2.07296	0.000449898	0.0307151	major histocompatibility complex, class I, C
RHOB	RHOB	ILMN_1802205	388	NM_004040	1.01976	2.02758	0.000670268	0.0376725	ras homolog family member B
RNASE1	RNASE1	ILMN_2333670	6035	NM_198235	1.01419	2.01977	0.000284464	0.0246504	ribonuclease A family member 1, pancreatic
DYSF	DYSF	ILMN_1810420	8291	NM_003494	1.01384	2.01927	0.000166117	0.019076	dysferlin
CHST13	CHST13	ILMN_1734707	166012	NM_152889	1.0099	2.01378	0.000133751	0.0168402	carbohydrate (chondroitin 4) sulfotransferase 13
C1QC	C1QC	ILMN_1785902	714	NM_172369	1.0042	2.00583	8.62481e-06	0.00528486	complement component 1, q subcomponent, C chain
CEACAM1	CEACAM1	ILMN_2371724	634	NM_001024912	0.991641	1.98845	0.000539518	0.0336583	carcinoembryonic antigen related cell adhesion molecule 1
OTOF	OTOF	ILMN_2340886	9381	NM_194322	0.984998	1.97931	0.00100519	0.0457286	otoferlin
FCGR1A	FCGR1A	ILMN_2176063	2209	NM_000566	0.968145	1.95632	4.30914e-05	0.010509	Fc fragment of IgG receptor Ia
IGFBP2	IGFBP2	ILMN_1725193	3485	NM_000597	0.956786	1.94098	0.000665166	0.0375917	insulin like growth factor binding protein 2
C3AR1	C3AR1	ILMN_1787529	719	NM_004054	0.955297	1.93898	5.14775e-05	0.0115128	complement component 3a receptor 1
CSTA	CSTA	ILMN_1669888	1475	NM_005213	0.941243	1.92018	7.49147e-06	0.00499206	cystatin A
ANG	ANG	ILMN_1760727	283	NM_001097577	0.936659	1.91409	3.8152e-05	0.0099363	angiogenin, ribonuclease, RNase A family, 5
CCR1	CCR1	ILMN_1678833	1230	NM_001295	0.922215	1.89502	0.000323353	0.0260937	chemokine (C-C motif) receptor 1
CFP	CFP	ILMN_1658121	5199	NM_002621	0.917014	1.8882	6.57053e-06	0.00472269	complement factor properdin
C5orf32	CYSTM1	ILMN_1761566	84418	NM_032412	0.908088	1.87656	6.4935e-06	0.00472269	cysteine rich transmembrane module containing 1
SIGLEC16	SIGLEC16	ILMN_2229261	400709	NR_002825	0.896635	1.86172	0.000222125	0.0218941	sialic acid binding Ig like lectin 16 (gene/pseudogene)
BRI3P1	NA	ILMN_3253304	NA	XR_015539	0.891464	1.85506	6.7822e-08	0.0010696	NA
PDLIM7	PDLIM7	ILMN_1690125	9260	NM_213636	0.888941	1.85182	6.30502e-05	0.0124293	PDZ and LIM domain 7
HK3	HK3	ILMN_1670302	3101	NM_002115	0.873176	1.83169	3.14615e-07	0.00118315	hexokinase 3
LRG1	LRG1	ILMN_1805228	116844	NM_052972	0.869759	1.82736	0.000497228	0.0322965	leucine-rich alpha-2-glycoprotein 1
MAFB	MAFB	ILMN_1764709	9935	NM_005461	0.86469	1.82095	0.000111328	0.0159129	v-maf avian musculoaponeurotic fibrosarcoma oncogene homolog B
FBN2	FBN2	ILMN_1670899	2201	NM_001999	0.862088	1.81767	1.38233e-05	0.00634961	fibrillin 2
CDA	CDA	ILMN_1714592	978	NM_001785	0.860433	1.81558	0.00010661	0.0156644	cytidine deaminase
C5AR1	C5AR1	ILMN_1689836	728	NM_001736	0.853379	1.80673	0.000118183	0.0161953	complement component 5a receptor 1
LOC728602	NA	ILMN_3305993	NA	XR_039532	0.8499	1.80238	4.25355e-06	0.00402488	NA
FAM129B	FAM129B	ILMN_2408576	64855	NM_001035534	0.846913	1.79865	8.93404e-06	0.00528486	family with sequence similarity 129 member B
C2	C2	ILMN_1710740	717	NM_000063	0.838399	1.78806	8.31419e-05	0.0143562	complement component 2
NCF2	NCF2	ILMN_1796642	4688	NM_000433	0.837323	1.78673	1.08704e-06	0.00233772	neutrophil cytosolic factor 2
LOC100129681	NA	ILMN_3259146	NA	XM_001726834	0.833907	1.78251	1.36242e-05	0.0063332	NA
PTPN20	NA	ILMN_1680945	NA	XM_937744	0.833269	1.78172	0.000260424	0.0235158	NA
PKD2L1	PKD2L1	ILMN_1789361	9033	NM_016112	0.831894	1.78002	4.1259e-05	0.0103586	polycystin 2 like 1, transient receptor potential cation channel
ACVRL1	ACVRL1	ILMN_1807493	94	NM_000020	0.817449	1.76229	4.70569e-06	0.00415561	activin A receptor like type 1
MEFV	MEFV	ILMN_2115752	4210	NM_000243	0.816792	1.76148	0.000252459	0.0231031	Mediterranean fever
ACPP	ACPP	ILMN_1758323	55	NM_001099	0.815304	1.75967	2.56895e-05	0.00883421	acid phosphatase, prostate
SPI1	SPI1	ILMN_1696463	6688	NM_001080547	0.812362	1.75608	0.000268032	0.023792	Spi-1 proto-oncogene
ASGR2	ASGR2	ILMN_1694966	433	NM_080914	0.812043	1.7557	0.000655139	0.0373622	asialoglycoprotein receptor 2
BST1	BST1	ILMN_1770161	683	NM_004334	0.804208	1.74619	2.81072e-05	0.00893441	bone marrow stromal cell antigen 1
CLEC4D	CLEC4D	ILMN_1808979	338339	NM_080387	0.80044	1.74163	2.79494e-05	0.00893441	C-type lectin domain family 4 member D
SLC22A4	SLC22A4	ILMN_2050911	6583	NM_003059	0.793032	1.73271	0.000112798	0.0159779	solute carrier family 22 member 4
CD163	CD163	ILMN_1733270	9332	NM_004244	0.791694	1.73111	0.0001746	0.0196441	CD163 molecule
IFI30	IFI30	ILMN_1807277	10437	NM_006332	0.789368	1.72832	1.95243e-05	0.00740774	interferon, gamma-inducible protein 30
LOC651524	NA	ILMN_1753518	NA	XM_940688	0.788927	1.72779	0.000350867	0.0271752	NA
HIST2H2AA3	HIST2H2AA3	ILMN_2144426	8337	NM_003516	0.788427	1.72719	0.000389282	0.0285382	histone cluster 2, H2aa3
OSCAR	OSCAR	ILMN_1741917	126014	NM_130771	0.78742	1.72599	8.76981e-06	0.00528486	osteoclast associated, immunoglobulin-like receptor
LOC284648	NA	ILMN_3286751	NA	XM_001718570	0.78559	1.7238	0.000528441	0.0332468	NA
CEBPE	CEBPE	ILMN_1779095	1053	NM_001805	0.78303	1.72074	0.00108664	0.047603	CCAAT/enhancer binding protein epsilon
ODF3B	ODF3B	ILMN_3241446	440836	NM_001014440	0.78155	1.71898	7.01158e-05	0.0134304	outer dense fiber of sperm tails 3B
ANXA2P1	ANXA2P1	ILMN_1698100	303	NR_001562	0.780272	1.71745	4.71553e-05	0.0109363	annexin A2 pseudogene 1
MGST1	MGST1	ILMN_2355168	4257	NM_145792	0.776688	1.71319	0.000102499	0.0155431	microsomal glutathione S-transferase 1
HPSE	HPSE	ILMN_2092850	10855	NM_006665	0.773855	1.70983	0.000249327	0.0230394	heparanase
HIST2H2AC	HIST2H2AC	ILMN_1768973	8338	NM_003517	0.773725	1.70968	0.000673152	0.0376725	histone cluster 2, H2ac
SERPINB2	SERPINB2	ILMN_2150856	5055	NM_002575	0.771148	1.70663	0.000847433	0.0420711	serpin peptidase inhibitor, clade B (ovalbumin), member 2
CDC42EP2	CDC42EP2	ILMN_1652777	10435	NM_006779	0.766184	1.70076	0.000230349	0.0219463	CDC42 effector protein 2
OSCAR	OSCAR	ILMN_2367418	126014	NM_133169	0.764369	1.69863	3.1329e-05	0.00932224	osteoclast associated, immunoglobulin-like receptor
DSC2	DSC2	ILMN_1663119	1824	NM_004949	0.762538	1.69647	0.0005522	0.0339751	desmocollin 2
SAMD4A	SAMD4A	ILMN_2119297	23034	NM_015589	0.762508	1.69644	0.0004299	0.0299109	sterile alpha motif domain containing 4A
MOSC1	2016-03-01	ILMN_1799106	64757	NM_022746	0.762212	1.69609	7.47933e-05	0.013877	mitochondrial amidoxime reducing component 1
RNY4	RNY4	ILMN_3241021	6086	NR_004393	0.756631	1.68954	0.000485131	0.0321857	RNA, Ro-associated Y4
	NA	ILMN_1910908	NA	BG205162	0.751239	1.68324	0.000492918	0.0322965	NA
OAF	OAF	ILMN_1668345	220323	NM_178507	0.741528	1.67195	0.000151811	0.0182558	out at first homolog
BST2	BST2	ILMN_1723480	684	NM_004335	0.737398	1.66717	0.000602942	0.0355248	bone marrow stromal cell antigen 2
RBP7	RBP7	ILMN_1716465	116362	NM_052960	0.737051	1.66676	0.000356339	0.0274132	retinol binding protein 7
BLVRB	BLVRB	ILMN_1797793	645	NM_000713	0.734716	1.66407	0.000124831	0.0164727	biliverdin reductase B
ACVRL1	ACVRL1	ILMN_3250257	94	NM_000020	0.734291	1.66358	0.000125597	0.0165063	activin A receptor like type 1
FKBP9L	FKBP9P1	ILMN_2089977	360132	NM_182827	0.732973	1.66206	0.000101849	0.0155431	FK506 binding protein 9 pseudogene 1
P2RY2	P2RY2	ILMN_2372915	5029	NM_002564	0.730901	1.65968	6.76894e-05	0.0130715	purinergic receptor P2Y2
SEPX1	MSRB1	ILMN_1719661	51734	NM_016332	0.728961	1.65744	1.4958e-05	0.00637562	methionine sulfoxide reductase B1
LRP3	LRP3	ILMN_2127605	4037	NM_002333	0.728898	1.65737	0.000152414	0.0182558	LDL receptor related protein 3
USP41	USP41	ILMN_1690365	373856	XM_036729	0.728741	1.65719	4.28723e-05	0.010509	ubiquitin specific peptidase 41
TTYH3	TTYH3	ILMN_1692731	80727	NM_025250	0.728408	1.65681	0.000309509	0.0256365	tweety family member 3
HSPA1A	HSPA1A	ILMN_1789074	3303	NM_005345	0.727465	1.65573	0.000399665	0.028944	heat shock protein family A (Hsp70) member 1A
FXYD6	FXYD6	ILMN_1768812	53826	NM_022003	0.725342	1.65329	0.00017015	0.0193061	FXYD domain containing ion transport regulator 6
LMO2	LMO2	ILMN_1800078	4005	NM_005574	0.720956	1.64827	3.04441e-05	0.00917434	LIM domain only 2
SULT1A1	SULT1A1	ILMN_1778756	6817	NM_177536	0.72063	1.6479	0.000867774	0.0428114	sulfotransferase family 1A member 1
GPBAR1	GPBAR1	ILMN_1727709	151306	NM_170699	0.718337	1.64528	0.000107468	0.015693	G protein-coupled bile acid receptor 1
FAH	FAH	ILMN_1781536	2184	NM_000137	0.715118	1.64162	5.42783e-05	0.0116695	fumarylacetoacetate hydrolase (fumarylacetoacetase)
RAB34	RAB34	ILMN_1810486	83871	NM_031934	0.713718	1.64002	7.65728e-05	0.0139826	RAB34, member RAS oncogene family
LOC728744	NA	ILMN_1654389	NA	XM_001128342	0.71347	1.63974	0.000880506	0.0431445	NA
DOK3	DOK3	ILMN_1692225	79930	NM_024872	0.712169	1.63827	0.000370143	0.0276654	docking protein 3
NCF4	NCF4	ILMN_1785005	4689	NM_000631	0.710058	1.63587	9.87745e-07	0.00223587	neutrophil cytosolic factor 4
C4orf18	FAM198B	ILMN_1761941	51313	NM_016613	0.709081	1.63476	0.00067234	0.0376725	family with sequence similarity 198 member B
SLC16A3	SLC16A3	ILMN_2364022	9123	NM_004207	0.708812	1.63446	3.13422e-06	0.00392637	solute carrier family 16 member 3
TP53I3	TP53I3	ILMN_2358919	9540	NM_147184	0.706071	1.63136	0.000197862	0.0205742	tumor protein p53 inducible protein 3
S100A11	S100A11	ILMN_1750101	6282	NM_005620	0.705382	1.63058	1.34861e-05	0.0063332	S100 calcium binding protein A11
IFI35	IFI35	ILMN_1745374	3430	NM_005533	0.700099	1.62462	7.40358e-05	0.013845	interferon induced protein 35
FPR1	FPR1	ILMN_2092118	2357	NM_002029	0.698882	1.62325	5.05423e-05	0.0114414	formyl peptide receptor 1
AGTRAP	AGTRAP	ILMN_1802458	57085	NM_001040196	0.698851	1.62321	5.9367e-05	0.0119016	angiotensin II receptor associated protein
ROGDI	ROGDI	ILMN_1722738	79641	NM_024589	0.693617	1.61733	0.000489292	0.0322641	rogdi homolog
BRI3	BRI3	ILMN_1781580	25798	NM_015379	0.691803	1.6153	3.22932e-06	0.00392637	brain protein I3
RNASE1	RNASE1	ILMN_1795183	6035	NM_198232	0.690994	1.6144	0.000163102	0.0189134	ribonuclease A family member 1, pancreatic
LST1	LST1	ILMN_2345353	7940	NM_205840	0.690587	1.61394	8.47612e-05	0.0144061	leukocyte specific transcript 1
NLRP12	NLRP12	ILMN_1716105	91662	NM_144687	0.690193	1.6135	1.85459e-05	0.00722465	NLR family, pyrin domain containing 12
FLJ22662	PLBD1	ILMN_1707286	79887	NM_024829	0.689428	1.61264	0.000260944	0.0235158	phospholipase B domain containing 1
LST1	LST1	ILMN_1688373	7940	NM_205839	0.688809	1.61195	0.000119808	0.0161953	leukocyte specific transcript 1
TBC1D2	TBC1D2	ILMN_1769876	55357	NM_018421	0.688628	1.61175	2.58145e-06	0.00392637	TBC1 domain family member 2
RIN2	RIN2	ILMN_1769546	54453	NM_018993	0.686425	1.60929	0.000368103	0.0276346	Ras and Rab interactor 2
SMARCD3	SMARCD3	ILMN_2309180	6604	NM_003078	0.685773	1.60856	4.49462e-05	0.0107374	SWI/SNF related, matrix associated, actin dependent regulator of chromatin, subfamily d, member 3
CD177	CD177	ILMN_3251610	57126	NM_020406	0.684654	1.60732	0.00067443	0.0376725	CD177 molecule
GRN	GRN	ILMN_1811702	2896	NM_002087	0.682186	1.60457	6.30609e-06	0.00472269	granulin
PILRA	PILRA	ILMN_1729915	29992	NM_178273	0.68197	1.60433	0.000260696	0.0235158	paired immunoglobin-like type 2 receptor alpha
CLEC3B	CLEC3B	ILMN_1682176	7123	NM_003278	0.67936	1.60143	0.000822601	0.041575	C-type lectin domain family 3 member B
FLJ43093	RAB44	ILMN_2123450	401258	NM_207498	0.677879	1.59979	0.000439036	0.0303236	RAB44, member RAS oncogene family
GNA15	GNA15	ILMN_1773963	2769	NM_002068	0.677582	1.59946	2.67013e-05	0.00883421	G protein subunit alpha 15
LILRA5	LILRA5	ILMN_2266595	353514	NM_021250	0.677376	1.59923	1.57786e-05	0.00654841	leukocyte immunoglobulin like receptor A5
PLXNB2	PLXNB2	ILMN_1763447	23654	NM_012401	0.674801	1.59638	8.11993e-05	0.0143347	plexin B2
FAM129B	FAM129B	ILMN_1661755	64855	NM_022833	0.674711	1.59628	0.00025112	0.0231031	family with sequence similarity 129 member B
LY96	LY96	ILMN_1724533	23643	NM_015364	0.673038	1.59443	1.17114e-05	0.0059982	lymphocyte antigen 96
PLAUR	PLAUR	ILMN_1691508	5329	NM_001005376	0.67235	1.59367	0.000552253	0.0339751	plasminogen activator, urokinase receptor
NFE2	NFE2	ILMN_1711786	4778	NM_006163	0.67138	1.5926	0.000871425	0.0429177	nuclear factor, erythroid 2
PRAM1	PRAM1	ILMN_1711493	84106	NM_032152	0.671366	1.59258	0.000251524	0.0231031	PML-RARA regulated adaptor molecule 1
HCK	HCK	ILMN_1791771	3055	NM_002110	0.671348	1.59256	3.67167e-05	0.0098614	HCK proto-oncogene, Src family tyrosine kinase
TNFSF13B	TNFSF13B	ILMN_1758418	10673	NM_006573	0.668818	1.58977	2.64183e-05	0.00883421	tumor necrosis factor superfamily member 13b
MYBPC3	MYBPC3	ILMN_1781184	4607	NM_000256	0.668511	1.58943	0.000180082	0.0198574	myosin binding protein C, cardiac
ATP6V0B	ATP6V0B	ILMN_2353642	533	NM_001039457	0.668155	1.58904	3.97865e-05	0.0102042	ATPase H+ transporting V0 subunit b
AGTRAP	AGTRAP	ILMN_2307656	57085	NM_001040194	0.667442	1.58825	3.70226e-05	0.0098614	angiotensin II receptor associated protein
PVRL2	NECTIN2	ILMN_1718303	5819	NM_002856	0.667435	1.58825	3.26158e-05	0.00952543	nectin cell adhesion molecule 2
ANKRD33	ANKRD33	ILMN_1667748	341405	NM_182608	0.664525	1.58505	6.75307e-05	0.0130715	ankyrin repeat domain 33
KLHDC8B	KLHDC8B	ILMN_1695246	200942	NM_173546	0.663886	1.58434	0.000284309	0.0246504	kelch domain containing 8B
ECGF1	TYMP	ILMN_2109708	1890	NM_001953	0.659203	1.57921	1.30659e-05	0.0063332	thymidine phosphorylase
CD163	CD163	ILMN_2379599	9332	NM_203416	0.65714	1.57695	0.000459128	0.0311741	CD163 molecule
ZYX	ZYX	ILMN_2371169	7791	NM_003461	0.656952	1.57675	0.000679515	0.0377338	zyxin
OPLAH	OPLAH	ILMN_1711030	26873	NM_017570	0.653482	1.57296	0.000506075	0.032548	5-oxoprolinase (ATP-hydrolysing)
SIGLEC5	SIGLEC5	ILMN_1740298	8778	NM_003830	0.652247	1.57161	0.000671278	0.0376725	sialic acid binding Ig like lectin 5
UBTD1	UBTD1	ILMN_1794914	80019	NM_024954	0.651483	1.57078	0.000187288	0.0201386	ubiquitin domain containing 1
LOC648733	NA	ILMN_1668588	NA	XM_943444	0.64572	1.56452	5.64089e-05	0.0117617	NA
H1F0	H1F0	ILMN_1757467	3005	NM_005318	0.645256	1.56402	0.000463324	0.0313154	H1 histone family member 0
SERTAD1	SERTAD1	ILMN_1794017	29950	NM_013376	0.642186	1.56069	0.000103222	0.0155906	SERTA domain containing 1
ZBTB7B	NA	ILMN_1736954	NA	NM_015872	0.641219	1.55965	3.37708e-07	0.00118315	NA
TSPO	TSPO	ILMN_2349658	706	NM_007311	0.63959	1.55789	4.05824e-05	0.0103228	translocator protein
NOD2	NOD2	ILMN_1762594	64127	NM_022162	0.638733	1.55696	0.000344425	0.0269516	nucleotide binding oligomerization domain containing 2
LOC100130289	NA	ILMN_3256445	NA	XR_039781	0.638192	1.55638	0.000726992	0.0389529	NA
HOMER3	HOMER3	ILMN_1811579	9454	NM_004838	0.637359	1.55548	0.000158513	0.018758	homer scaffolding protein 3
C9orf66	C9orf66	ILMN_1717248	157983	NM_152569	0.636981	1.55507	0.000102267	0.0155431	chromosome 9 open reading frame 66
LOC728919	NA	ILMN_1655819	NA	XM_001133283	0.63685	1.55493	0.00111452	0.0484837	NA
ECHDC3	ECHDC3	ILMN_2072178	79746	NM_024693	0.63685	1.55493	0.000493197	0.0322965	enoyl-CoA hydratase domain containing 3
PNPLA1	PNPLA1	ILMN_1808241	285848	NM_173676	0.635758	1.55375	0.000127351	0.0165528	patatin like phospholipase domain containing 1
ADAMTSL4	ADAMTSL4	ILMN_1762294	54507	NM_025008	0.63109	1.54873	0.000408019	0.0292046	ADAMTS like 4
SULT1A1	SULT1A1	ILMN_1656900	6817	NM_177536	0.629532	1.54706	2.52961e-05	0.00880008	sulfotransferase family 1A member 1
TRIM7	TRIM7	ILMN_1756657	81786	NM_033342	0.629269	1.54678	3.44989e-05	0.0098614	tripartite motif containing 7
SIRPA	SIRPA	ILMN_2372974	140885	NM_080792	0.62475	1.54194	0.000221755	0.0218941	signal regulatory protein alpha
GPBAR1	GPBAR1	ILMN_2316386	151306	NM_001077191	0.624218	1.54137	0.000413368	0.0293298	G protein-coupled bile acid receptor 1
ADAP2	ADAP2	ILMN_1763000	55803	NM_018404	0.623891	1.54103	1.44231e-05	0.00637562	ArfGAP with dual PH domains 2
KIAA1602	NA	ILMN_1763640	NA	NM_020941	0.623727	1.54085	0.000895685	0.0434644	NA
LOC100127893	NA	ILMN_3271204	NA	XR_038779	0.622921	1.53999	0.000801297	0.0409909	NA
CTSZ	CTSZ	ILMN_1666269	1522	NM_001336	0.621895	1.5389	0.000527628	0.0332399	cathepsin Z
LOC440928	NA	ILMN_1713764	NA	XM_942885	0.621785	1.53878	0.000231052	0.0219508	NA
LOC283392	TRHDE-AS1	ILMN_2096031	283392	NM_001025457	0.620737	1.53766	0.000701196	0.0383083	TRHDE antisense RNA 1
C14orf143	EFCAB11	ILMN_2193315	90141	NM_145231	0.620154	1.53704	3.78302e-05	0.0099363	EF-hand calcium binding domain 11
TMEM167A	TMEM167A	ILMN_1742813	153339	NM_174909	0.617643	1.53437	0.000433197	0.0300961	transmembrane protein 167A
ADAMTSL4	ADAMTSL4	ILMN_1687035	54507	NM_025008	0.617299	1.534	2.04458e-05	0.0075603	ADAMTS like 4
CD33	CD33	ILMN_1747622	945	NM_001772	0.617227	1.53392	2.64935e-05	0.00883421	CD33 molecule
PYCARD	PYCARD	ILMN_1698766	29108	NM_013258	0.617057	1.53374	2.78324e-06	0.00392637	PYD and CARD domain containing
IGSF6	IGSF6	ILMN_1653498	10261	NM_005849	0.610429	1.52671	0.00104593	0.04649	immunoglobulin superfamily member 6
TNFSF13B	TNFSF13B	ILMN_2066858	10673	NM_006573	0.610293	1.52657	2.21031e-05	0.00780405	tumor necrosis factor superfamily member 13b
NACC2	NACC2	ILMN_1809522	138151	NM_144653	0.609937	1.52619	0.000846466	0.0420672	NACC family member 2
C1QA	C1QA	ILMN_1737918	712	NM_015991	0.607459	1.52357	0.000373381	0.0278634	complement component 1, q subcomponent, A chain
RRAGD	RRAGD	ILMN_1699772	58528	NM_021244	0.607246	1.52335	0.000196491	0.0205261	Ras related GTP binding D
C11orf75	SMCO4	ILMN_1798270	56935	NM_020179	0.606736	1.52281	0.000114435	0.0160657	single-pass membrane protein with coiled-coil domains 4
GRIP2	GRIP2	ILMN_1693827	80852	NM_001080423	0.605245	1.52124	0.00077367	0.0403571	glutamate receptor interacting protein 2
UNC93B1	UNC93B1	ILMN_2193591	81622	NM_030930	0.603351	1.51924	0.000266391	0.0237353	unc-93 homolog B1 (C. elegans)
ROPN1L	ROPN1L	ILMN_1696466	83853	NM_031916	0.602797	1.51866	0.000368593	0.0276346	rhophilin associated tail protein 1-like
RENBP	RENBP	ILMN_1780057	5973	NM_002910	0.601746	1.51755	7.24535e-05	0.0137117	renin binding protein
ALDH3B1	ALDH3B1	ILMN_1728662	221	NM_000694	0.601594	1.51739	0.00023054	0.0219463	aldehyde dehydrogenase 3 family member B1
LOC653907	NA	ILMN_1711611	NA	XM_936496	0.598678	1.51433	0.000429728	0.0299109	NA
PFKFB4	PFKFB4	ILMN_1653292	5210	NM_004567	0.596182	1.51171	1.1255e-05	0.00598309	6-phosphofructo-2-kinase/fructose-2,6-biphosphatase 4
PILRA	PILRA	ILMN_2362858	29992	NM_178272	0.594823	1.51029	0.000119573	0.0161953	paired immunoglobin-like type 2 receptor alpha
CEBPD	CEBPD	ILMN_1782050	1052	NM_005195	0.593641	1.50905	0.000273645	0.0239754	CCAAT/enhancer binding protein delta
C9orf167	TOR4A	ILMN_1813641	54863	NM_017723	0.592325	1.50767	0.000127809	0.0165668	torsin family 4 member A
TGM2	TGM2	ILMN_1679267	7052	NM_198951	0.590502	1.50577	0.000417901	0.0295152	transglutaminase 2
ANRIL	CDKN2B-AS1	ILMN_1887731	100048912	NR_003529	0.589279	1.50449	0.000348721	0.0270915	CDKN2B antisense RNA 1
FCN1	FCN1	ILMN_1668063	2219	NM_002003	0.588398	1.50358	3.68815e-06	0.00392637	ficolin 1
AMY1B	AMY1B	ILMN_1726327	277	NM_001008218	0.588286	1.50346	3.33971e-05	0.00969377	amylase, alpha 1B (salivary)
SLC11A1	SLC11A1	ILMN_1741165	6556	NM_000578	0.588282	1.50346	0.000492823	0.0322965	solute carrier family 11 member 1
KIAA0319L	KIAA0319L	ILMN_1683277	79932	NM_024874	0.588027	1.50319	5.7426e-05	0.0117617	KIAA0319 like
QSOX1	QSOX1	ILMN_2411282	5768	NM_001004128	0.587641	1.50279	5.43028e-05	0.0116695	quiescin sulfhydryl oxidase 1
YIF1B	YIF1B	ILMN_1773687	90522	NM_001031731	0.587169	1.5023	0.000103478	0.0155906	Yip1 interacting factor homolog B, membrane trafficking protein
C1orf38	THEMIS2	ILMN_1735143	9473	NM_004848	0.587008	1.50213	0.00030906	0.0256365	thymocyte selection associated family member 2
AGPAT2	AGPAT2	ILMN_1732176	10555	NM_006412	0.58648	1.50158	0.000190671	0.0201813	1-acylglycerol-3-phosphate O-acyltransferase 2
ECM1	ECM1	ILMN_2329735	1893	NM_022664	0.585911	1.50099	0.000189501	0.0201476	extracellular matrix protein 1
RBM47	RBM47	ILMN_3306730	54502	NM_019027	0.585316	1.50037	0.00088518	0.0432641	RNA binding motif protein 47
PAQR4	PAQR4	ILMN_1660793	124222	NM_152341	0.585165	1.50021	0.00111331	0.0484837	progestin and adipoQ receptor family member IV
RNF135	RNF135	ILMN_1700660	84282	NM_197939	0.585139	1.50018	4.15991e-05	0.0103586	ring finger protein 135

## Sheet: Upregulated_genes
	Supplementary Table 2-5 List of up-regulated genes
ILMN_GENE	geneSymbol	PROBE_ID	ENTREZ_GENE_ID	ACCESSION	logFC	Fold_Change	P.Value	BH.P.Val	GENE_NAME
IFI27	IFI27	ILMN_2058782	3429	NM_005532	2.80007	6.96474	0.000784555	0.040567	interferon, alpha-inducible protein 27
OLFM4	OLFM4	ILMN_2116877	10562	NM_006418	2.10202	4.2931	0.000707312	0.0384737	olfactomedin 4
DEFA3	DEFA3	ILMN_2165289	1668	NM_005217	1.97216	3.92356	0.00015143	0.0182558	defensin alpha 3
DEFA1B	DEFA1B	ILMN_1725661	728358	NM_001042500	1.9636	3.90034	0.000161578	0.0188749	defensin alpha 1B
CEACAM6	CEACAM6	ILMN_1712522	4680	NM_002483	1.93816	3.83217	0.00027228	0.0239456	carcinoembryonic antigen related cell adhesion molecule 6
ELANE	ELANE	ILMN_1706635	1991	NM_001972	1.90416	3.7429	0.000219577	0.0218248	elastase, neutrophil expressed
CTSG	CTSG	ILMN_1680424	1511	NM_001911	1.80757	3.50053	0.000503653	0.0325092	cathepsin G
RNASE3	RNASE3	ILMN_2113126	6037	NM_002935	1.69872	3.24612	4.61895e-05	0.0109266	ribonuclease A family member 3
DEFA1	DEFA1	ILMN_2193213	1667	NM_004084	1.6603	3.16083	0.000190344	0.0201813	defensin alpha 1
SLPI	SLPI	ILMN_2114720	6590	NM_003064	1.57309	2.97542	0.000107978	0.0157189	secretory leukocyte peptidase inhibitor
BPI	BPI	ILMN_1766736	671	NM_001725	1.52463	2.87714	0.000688925	0.0378779	bactericidal/permeability-increasing protein
RNASE2	RNASE2	ILMN_1730628	6036	NM_002934	1.48343	2.79613	4.5626e-08	0.0010696	ribonuclease A family member 2
IFITM3	IFITM3	ILMN_1805750	10410	NM_021034	1.41086	2.65895	0.000126851	0.0165526	interferon induced transmembrane protein 3
TACSTD2	TACSTD2	ILMN_1739001	4070	NM_002353	1.39559	2.63096	0.000769457	0.0402705	tumor-associated calcium signal transducer 2
TCN2	TCN2	ILMN_1740572	6948	NM_000355	1.36681	2.579	3.50104e-07	0.00118315	transcobalamin 2
ARG1	ARG1	ILMN_1812281	383	NM_000045	1.33504	2.52282	0.000490918	0.0322965	arginase 1
LCN2	LCN2	ILMN_1692223	3934	NM_005564	1.30057	2.46327	0.000200504	0.0206672	lipocalin 2
C1QB	C1QB	ILMN_1796409	713	NM_000491	1.29372	2.45159	0.000464391	0.0313427	complement component 1, q subcomponent, B chain
COL17A1	COL17A1	ILMN_1651282	1308	NM_000494	1.2615	2.39745	0.000119525	0.0161953	collagen type XVII alpha 1
ADM	ADM	ILMN_1708934	133	NM_001124	1.26088	2.39641	9.47344e-05	0.0152793	adrenomedullin
ABCA13	ABCA13	ILMN_1704579	154664	NM_152701	1.25917	2.39358	0.000762975	0.0401087	ATP binding cassette subfamily A member 13
HP	HP	ILMN_1812433	3240	NM_005143	1.25441	2.3857	0.000179549	0.0198574	haptoglobin
BEX1	BEX1	ILMN_2234697	55859	NM_018476	1.22681	2.34049	0.000187971	0.0201476	brain expressed X-linked 1
MYL9	MYL9	ILMN_1675062	10398	NM_006097	1.21269	2.31769	4.90082e-05	0.0112013	myosin light chain 9
MS4A4A	MS4A4A	ILMN_2370336	51338	NM_148975	1.18567	2.2747	0.000386492	0.0285138	membrane spanning 4-domains A4A
ORM1	ORM1	ILMN_1696584	5004	NM_000607	1.18537	2.27422	0.00091802	0.0438297	orosomucoid 1
LTBR	LTBR	ILMN_1667476	4055	NM_002342	1.18087	2.26713	5.41797e-09	0.000256335	lymphotoxin beta receptor
C19orf59	MCEMP1	ILMN_1762713	199675	NM_174918	1.15104	2.22074	2.58338e-07	0.00118315	mast cell-expressed membrane protein 1
HLA-C	HLA-C	ILMN_2150787	3107	NM_002117	1.05169	2.07296	0.000449898	0.0307151	major histocompatibility complex, class I, C
RHOB	RHOB	ILMN_1802205	388	NM_004040	1.01976	2.02758	0.000670268	0.0376725	ras homolog family member B
DYSF	DYSF	ILMN_1810420	8291	NM_003494	1.01384	2.01927	0.000166117	0.019076	dysferlin
CHST13	CHST13	ILMN_1734707	166012	NM_152889	1.0099	2.01378	0.000133751	0.0168402	carbohydrate (chondroitin 4) sulfotransferase 13
C1QC	C1QC	ILMN_1785902	714	NM_172369	1.0042	2.00583	8.62481e-06	0.00528486	complement component 1, q subcomponent, C chain
CEACAM1	CEACAM1	ILMN_2371724	634	NM_001024912	0.991641	1.98845	0.000539518	0.0336583	carcinoembryonic antigen related cell adhesion molecule 1
OTOF	OTOF	ILMN_2340886	9381	NM_194322	0.984998	1.97931	0.00100519	0.0457286	otoferlin
FCGR1A	FCGR1A	ILMN_2176063	2209	NM_000566	0.968145	1.95632	4.30914e-05	0.010509	Fc fragment of IgG receptor Ia
IGFBP2	IGFBP2	ILMN_1725193	3485	NM_000597	0.956786	1.94098	0.000665166	0.0375917	insulin like growth factor binding protein 2
C3AR1	C3AR1	ILMN_1787529	719	NM_004054	0.955297	1.93898	5.14775e-05	0.0115128	complement component 3a receptor 1
CSTA	CSTA	ILMN_1669888	1475	NM_005213	0.941243	1.92018	7.49147e-06	0.00499206	cystatin A
ANG	ANG	ILMN_1760727	283	NM_001097577	0.936659	1.91409	3.8152e-05	0.0099363	angiogenin, ribonuclease, RNase A family, 5
CCR1	CCR1	ILMN_1678833	1230	NM_001295	0.922215	1.89502	0.000323353	0.0260937	chemokine (C-C motif) receptor 1
CFP	CFP	ILMN_1658121	5199	NM_002621	0.917014	1.8882	6.57053e-06	0.00472269	complement factor properdin
C5orf32	CYSTM1	ILMN_1761566	84418	NM_032412	0.908088	1.87656	6.4935e-06	0.00472269	cysteine rich transmembrane module containing 1
SIGLEC16	SIGLEC16	ILMN_2229261	400709	NR_002825	0.896635	1.86172	0.000222125	0.0218941	sialic acid binding Ig like lectin 16 (gene/pseudogene)
PDLIM7	PDLIM7	ILMN_1690125	9260	NM_213636	0.888941	1.85182	6.30502e-05	0.0124293	PDZ and LIM domain 7
HK3	HK3	ILMN_1670302	3101	NM_002115	0.873176	1.83169	3.14615e-07	0.00118315	hexokinase 3
LRG1	LRG1	ILMN_1805228	116844	NM_052972	0.869759	1.82736	0.000497228	0.0322965	leucine-rich alpha-2-glycoprotein 1
MAFB	MAFB	ILMN_1764709	9935	NM_005461	0.86469	1.82095	0.000111328	0.0159129	v-maf avian musculoaponeurotic fibrosarcoma oncogene homolog B
FBN2	FBN2	ILMN_1670899	2201	NM_001999	0.862088	1.81767	1.38233e-05	0.00634961	fibrillin 2
CDA	CDA	ILMN_1714592	978	NM_001785	0.860433	1.81558	0.00010661	0.0156644	cytidine deaminase
C5AR1	C5AR1	ILMN_1689836	728	NM_001736	0.853379	1.80673	0.000118183	0.0161953	complement component 5a receptor 1
C2	C2	ILMN_1710740	717	NM_000063	0.838399	1.78806	8.31419e-05	0.0143562	complement component 2
NCF2	NCF2	ILMN_1796642	4688	NM_000433	0.837323	1.78673	1.08704e-06	0.00233772	neutrophil cytosolic factor 2
PKD2L1	PKD2L1	ILMN_1789361	9033	NM_016112	0.831894	1.78002	4.1259e-05	0.0103586	polycystin 2 like 1, transient receptor potential cation channel
MEFV	MEFV	ILMN_2115752	4210	NM_000243	0.816792	1.76148	0.000252459	0.0231031	Mediterranean fever
ACPP	ACPP	ILMN_1758323	55	NM_001099	0.815304	1.75967	2.56895e-05	0.00883421	acid phosphatase, prostate
SPI1	SPI1	ILMN_1696463	6688	NM_001080547	0.812362	1.75608	0.000268032	0.023792	Spi-1 proto-oncogene
ASGR2	ASGR2	ILMN_1694966	433	NM_080914	0.812043	1.7557	0.000655139	0.0373622	asialoglycoprotein receptor 2
BST1	BST1	ILMN_1770161	683	NM_004334	0.804208	1.74619	2.81072e-05	0.00893441	bone marrow stromal cell antigen 1
CLEC4D	CLEC4D	ILMN_1808979	338339	NM_080387	0.80044	1.74163	2.79494e-05	0.00893441	C-type lectin domain family 4 member D
SLC22A4	SLC22A4	ILMN_2050911	6583	NM_003059	0.793032	1.73271	0.000112798	0.0159779	solute carrier family 22 member 4
IFI30	IFI30	ILMN_1807277	10437	NM_006332	0.789368	1.72832	1.95243e-05	0.00740774	interferon, gamma-inducible protein 30
HIST2H2AA3	HIST2H2AA3	ILMN_2144426	8337	NM_003516	0.788427	1.72719	0.000389282	0.0285382	histone cluster 2, H2aa3
CEBPE	CEBPE	ILMN_1779095	1053	NM_001805	0.78303	1.72074	0.00108664	0.047603	CCAAT/enhancer binding protein epsilon
ODF3B	ODF3B	ILMN_3241446	440836	NM_001014440	0.78155	1.71898	7.01158e-05	0.0134304	outer dense fiber of sperm tails 3B
ANXA2P1	ANXA2P1	ILMN_1698100	303	NR_001562	0.780272	1.71745	4.71553e-05	0.0109363	annexin A2 pseudogene 1
MGST1	MGST1	ILMN_2355168	4257	NM_145792	0.776688	1.71319	0.000102499	0.0155431	microsomal glutathione S-transferase 1
HPSE	HPSE	ILMN_2092850	10855	NM_006665	0.773855	1.70983	0.000249327	0.0230394	heparanase
HIST2H2AC	HIST2H2AC	ILMN_1768973	8338	NM_003517	0.773725	1.70968	0.000673152	0.0376725	histone cluster 2, H2ac
SERPINB2	SERPINB2	ILMN_2150856	5055	NM_002575	0.771148	1.70663	0.000847433	0.0420711	serpin peptidase inhibitor, clade B (ovalbumin), member 2
CDC42EP2	CDC42EP2	ILMN_1652777	10435	NM_006779	0.766184	1.70076	0.000230349	0.0219463	CDC42 effector protein 2
OSCAR	OSCAR	ILMN_2367418	126014	NM_133169	0.764369	1.69863	3.1329e-05	0.00932224	osteoclast associated, immunoglobulin-like receptor
DSC2	DSC2	ILMN_1663119	1824	NM_004949	0.762538	1.69647	0.0005522	0.0339751	desmocollin 2
SAMD4A	SAMD4A	ILMN_2119297	23034	NM_015589	0.762508	1.69644	0.0004299	0.0299109	sterile alpha motif domain containing 4A
MOSC1	2016-03-01	ILMN_1799106	64757	NM_022746	0.762212	1.69609	7.47933e-05	0.013877	mitochondrial amidoxime reducing component 1
RNY4	RNY4	ILMN_3241021	6086	NR_004393	0.756631	1.68954	0.000485131	0.0321857	RNA, Ro-associated Y4
OAF	OAF	ILMN_1668345	220323	NM_178507	0.741528	1.67195	0.000151811	0.0182558	out at first homolog
BST2	BST2	ILMN_1723480	684	NM_004335	0.737398	1.66717	0.000602942	0.0355248	bone marrow stromal cell antigen 2
RBP7	RBP7	ILMN_1716465	116362	NM_052960	0.737051	1.66676	0.000356339	0.0274132	retinol binding protein 7
BLVRB	BLVRB	ILMN_1797793	645	NM_000713	0.734716	1.66407	0.000124831	0.0164727	biliverdin reductase B
ACVRL1	ACVRL1	ILMN_3250257	94	NM_000020	0.734291	1.66358	0.000125597	0.0165063	activin A receptor like type 1
FKBP9L	FKBP9P1	ILMN_2089977	360132	NM_182827	0.732973	1.66206	0.000101849	0.0155431	FK506 binding protein 9 pseudogene 1
P2RY2	P2RY2	ILMN_2372915	5029	NM_002564	0.730901	1.65968	6.76894e-05	0.0130715	purinergic receptor P2Y2
SEPX1	MSRB1	ILMN_1719661	51734	NM_016332	0.728961	1.65744	1.4958e-05	0.00637562	methionine sulfoxide reductase B1
LRP3	LRP3	ILMN_2127605	4037	NM_002333	0.728898	1.65737	0.000152414	0.0182558	LDL receptor related protein 3
USP41	USP41	ILMN_1690365	373856	XM_036729	0.728741	1.65719	4.28723e-05	0.010509	ubiquitin specific peptidase 41
TTYH3	TTYH3	ILMN_1692731	80727	NM_025250	0.728408	1.65681	0.000309509	0.0256365	tweety family member 3
HSPA1A	HSPA1A	ILMN_1789074	3303	NM_005345	0.727465	1.65573	0.000399665	0.028944	heat shock protein family A (Hsp70) member 1A
FXYD6	FXYD6	ILMN_1768812	53826	NM_022003	0.725342	1.65329	0.00017015	0.0193061	FXYD domain containing ion transport regulator 6
LMO2	LMO2	ILMN_1800078	4005	NM_005574	0.720956	1.64827	3.04441e-05	0.00917434	LIM domain only 2
FAH	FAH	ILMN_1781536	2184	NM_000137	0.715118	1.64162	5.42783e-05	0.0116695	fumarylacetoacetate hydrolase (fumarylacetoacetase)
RAB34	RAB34	ILMN_1810486	83871	NM_031934	0.713718	1.64002	7.65728e-05	0.0139826	RAB34, member RAS oncogene family
DOK3	DOK3	ILMN_1692225	79930	NM_024872	0.712169	1.63827	0.000370143	0.0276654	docking protein 3
NCF4	NCF4	ILMN_1785005	4689	NM_000631	0.710058	1.63587	9.87745e-07	0.00223587	neutrophil cytosolic factor 4
C4orf18	FAM198B	ILMN_1761941	51313	NM_016613	0.709081	1.63476	0.00067234	0.0376725	family with sequence similarity 198 member B
SLC16A3	SLC16A3	ILMN_2364022	9123	NM_004207	0.708812	1.63446	3.13422e-06	0.00392637	solute carrier family 16 member 3
TP53I3	TP53I3	ILMN_2358919	9540	NM_147184	0.706071	1.63136	0.000197862	0.0205742	tumor protein p53 inducible protein 3
S100A11	S100A11	ILMN_1750101	6282	NM_005620	0.705382	1.63058	1.34861e-05	0.0063332	S100 calcium binding protein A11
IFI35	IFI35	ILMN_1745374	3430	NM_005533	0.700099	1.62462	7.40358e-05	0.013845	interferon induced protein 35
FPR1	FPR1	ILMN_2092118	2357	NM_002029	0.698882	1.62325	5.05423e-05	0.0114414	formyl peptide receptor 1
ROGDI	ROGDI	ILMN_1722738	79641	NM_024589	0.693617	1.61733	0.000489292	0.0322641	rogdi homolog
BRI3	BRI3	ILMN_1781580	25798	NM_015379	0.691803	1.6153	3.22932e-06	0.00392637	brain protein I3
RNASE1	RNASE1	ILMN_1795183	6035	NM_198232	0.690994	1.6144	0.000163102	0.0189134	ribonuclease A family member 1, pancreatic
NLRP12	NLRP12	ILMN_1716105	91662	NM_144687	0.690193	1.6135	1.85459e-05	0.00722465	NLR family, pyrin domain containing 12
FLJ22662	PLBD1	ILMN_1707286	79887	NM_024829	0.689428	1.61264	0.000260944	0.0235158	phospholipase B domain containing 1
LST1	LST1	ILMN_1688373	7940	NM_205839	0.688809	1.61195	0.000119808	0.0161953	leukocyte specific transcript 1
TBC1D2	TBC1D2	ILMN_1769876	55357	NM_018421	0.688628	1.61175	2.58145e-06	0.00392637	TBC1 domain family member 2
RIN2	RIN2	ILMN_1769546	54453	NM_018993	0.686425	1.60929	0.000368103	0.0276346	Ras and Rab interactor 2
SMARCD3	SMARCD3	ILMN_2309180	6604	NM_003078	0.685773	1.60856	4.49462e-05	0.0107374	SWI/SNF related, matrix associated, actin dependent regulator of chromatin, subfamily d, member 3
CD177	CD177	ILMN_3251610	57126	NM_020406	0.684654	1.60732	0.00067443	0.0376725	CD177 molecule
GRN	GRN	ILMN_1811702	2896	NM_002087	0.682186	1.60457	6.30609e-06	0.00472269	granulin
CLEC3B	CLEC3B	ILMN_1682176	7123	NM_003278	0.67936	1.60143	0.000822601	0.041575	C-type lectin domain family 3 member B
FLJ43093	RAB44	ILMN_2123450	401258	NM_207498	0.677879	1.59979	0.000439036	0.0303236	RAB44, member RAS oncogene family
GNA15	GNA15	ILMN_1773963	2769	NM_002068	0.677582	1.59946	2.67013e-05	0.00883421	G protein subunit alpha 15
LILRA5	LILRA5	ILMN_2266595	353514	NM_021250	0.677376	1.59923	1.57786e-05	0.00654841	leukocyte immunoglobulin like receptor A5
PLXNB2	PLXNB2	ILMN_1763447	23654	NM_012401	0.674801	1.59638	8.11993e-05	0.0143347	plexin B2
FAM129B	FAM129B	ILMN_1661755	64855	NM_022833	0.674711	1.59628	0.00025112	0.0231031	family with sequence similarity 129 member B
LY96	LY96	ILMN_1724533	23643	NM_015364	0.673038	1.59443	1.17114e-05	0.0059982	lymphocyte antigen 96
PLAUR	PLAUR	ILMN_1691508	5329	NM_001005376	0.67235	1.59367	0.000552253	0.0339751	plasminogen activator, urokinase receptor
NFE2	NFE2	ILMN_1711786	4778	NM_006163	0.67138	1.5926	0.000871425	0.0429177	nuclear factor, erythroid 2	regulatory elements
PRAM1	PRAM1	ILMN_1711493	84106	NM_032152	0.671366	1.59258	0.000251524	0.0231031	PML-RARA regulated adaptor molecule 1
HCK	HCK	ILMN_1791771	3055	NM_002110	0.671348	1.59256	3.67167e-05	0.0098614	HCK proto-oncogene, Src family tyrosine kinase
MYBPC3	MYBPC3	ILMN_1781184	4607	NM_000256	0.668511	1.58943	0.000180082	0.0198574	myosin binding protein C, cardiac
ATP6V0B	ATP6V0B	ILMN_2353642	533	NM_001039457	0.668155	1.58904	3.97865e-05	0.0102042	ATPase H+ transporting V0 subunit b
AGTRAP	AGTRAP	ILMN_2307656	57085	NM_001040194	0.667442	1.58825	3.70226e-05	0.0098614	angiotensin II receptor associated protein
PVRL2	NECTIN2	ILMN_1718303	5819	NM_002856	0.667435	1.58825	3.26158e-05	0.00952543	nectin cell adhesion molecule 2
ANKRD33	ANKRD33	ILMN_1667748	341405	NM_182608	0.664525	1.58505	6.75307e-05	0.0130715	ankyrin repeat domain 33	protein folding
KLHDC8B	KLHDC8B	ILMN_1695246	200942	NM_173546	0.663886	1.58434	0.000284309	0.0246504	kelch domain containing 8B
ECGF1	TYMP	ILMN_2109708	1890	NM_001953	0.659203	1.57921	1.30659e-05	0.0063332	thymidine phosphorylase
CD163	CD163	ILMN_2379599	9332	NM_203416	0.65714	1.57695	0.000459128	0.0311741	CD163 molecule
ZYX	ZYX	ILMN_2371169	7791	NM_003461	0.656952	1.57675	0.000679515	0.0377338	zyxin
OPLAH	OPLAH	ILMN_1711030	26873	NM_017570	0.653482	1.57296	0.000506075	0.032548	5-oxoprolinase (ATP-hydrolysing)
SIGLEC5	SIGLEC5	ILMN_1740298	8778	NM_003830	0.652247	1.57161	0.000671278	0.0376725	sialic acid binding Ig like lectin 5
UBTD1	UBTD1	ILMN_1794914	80019	NM_024954	0.651483	1.57078	0.000187288	0.0201386	ubiquitin domain containing 1
H1F0	H1F0	ILMN_1757467	3005	NM_005318	0.645256	1.56402	0.000463324	0.0313154	H1 histone family member 0
SERTAD1	SERTAD1	ILMN_1794017	29950	NM_013376	0.642186	1.56069	0.000103222	0.0155906	SERTA domain containing 1
TSPO	TSPO	ILMN_2349658	706	NM_007311	0.63959	1.55789	4.05824e-05	0.0103228	translocator protein
NOD2	NOD2	ILMN_1762594	64127	NM_022162	0.638733	1.55696	0.000344425	0.0269516	nucleotide binding oligomerization domain containing 2
HOMER3	HOMER3	ILMN_1811579	9454	NM_004838	0.637359	1.55548	0.000158513	0.018758	homer scaffolding protein 3
C9orf66	C9orf66	ILMN_1717248	157983	NM_152569	0.636981	1.55507	0.000102267	0.0155431	chromosome 9 open reading frame 66
ECHDC3	ECHDC3	ILMN_2072178	79746	NM_024693	0.63685	1.55493	0.000493197	0.0322965	enoyl-CoA hydratase domain containing 3
PNPLA1	PNPLA1	ILMN_1808241	285848	NM_173676	0.635758	1.55375	0.000127351	0.0165528	patatin like phospholipase domain containing 1
SULT1A1	SULT1A1	ILMN_1656900	6817	NM_177536	0.629532	1.54706	2.52961e-05	0.00880008	sulfotransferase family 1A member 1
TRIM7	TRIM7	ILMN_1756657	81786	NM_033342	0.629269	1.54678	3.44989e-05	0.0098614	tripartite motif containing 7
SIRPA	SIRPA	ILMN_2372974	140885	NM_080792	0.62475	1.54194	0.000221755	0.0218941	signal regulatory protein alpha
GPBAR1	GPBAR1	ILMN_2316386	151306	NM_001077191	0.624218	1.54137	0.000413368	0.0293298	G protein-coupled bile acid receptor 1
ADAP2	ADAP2	ILMN_1763000	55803	NM_018404	0.623891	1.54103	1.44231e-05	0.00637562	ArfGAP with dual PH domains 2
CTSZ	CTSZ	ILMN_1666269	1522	NM_001336	0.621895	1.5389	0.000527628	0.0332399	cathepsin Z
LOC283392	TRHDE-AS1	ILMN_2096031	283392	NM_001025457	0.620737	1.53766	0.000701196	0.0383083	TRHDE antisense RNA 1
C14orf143	EFCAB11	ILMN_2193315	90141	NM_145231	0.620154	1.53704	3.78302e-05	0.0099363	EF-hand calcium binding domain 11
TMEM167A	TMEM167A	ILMN_1742813	153339	NM_174909	0.617643	1.53437	0.000433197	0.0300961	transmembrane protein 167A
ADAMTSL4	ADAMTSL4	ILMN_1687035	54507	NM_025008	0.617299	1.534	2.04458e-05	0.0075603	ADAMTS like 4
CD33	CD33	ILMN_1747622	945	NM_001772	0.617227	1.53392	2.64935e-05	0.00883421	CD33 molecule
PYCARD	PYCARD	ILMN_1698766	29108	NM_013258	0.617057	1.53374	2.78324e-06	0.00392637	PYD and CARD domain containing
IGSF6	IGSF6	ILMN_1653498	10261	NM_005849	0.610429	1.52671	0.00104593	0.04649	immunoglobulin superfamily member 6
TNFSF13B	TNFSF13B	ILMN_2066858	10673	NM_006573	0.610293	1.52657	2.21031e-05	0.00780405	tumor necrosis factor superfamily member 13b
NACC2	NACC2	ILMN_1809522	138151	NM_144653	0.609937	1.52619	0.000846466	0.0420672	NACC family member 2
C1QA	C1QA	ILMN_1737918	712	NM_015991	0.607459	1.52357	0.000373381	0.0278634	complement component 1, q subcomponent, A chain
RRAGD	RRAGD	ILMN_1699772	58528	NM_021244	0.607246	1.52335	0.000196491	0.0205261	Ras related GTP binding D
C11orf75	SMCO4	ILMN_1798270	56935	NM_020179	0.606736	1.52281	0.000114435	0.0160657	single-pass membrane protein with coiled-coil domains 4
GRIP2	GRIP2	ILMN_1693827	80852	NM_001080423	0.605245	1.52124	0.00077367	0.0403571	glutamate receptor interacting protein 2
UNC93B1	UNC93B1	ILMN_2193591	81622	NM_030930	0.603351	1.51924	0.000266391	0.0237353	unc-93 homolog B1 (C. elegans)
ROPN1L	ROPN1L	ILMN_1696466	83853	NM_031916	0.602797	1.51866	0.000368593	0.0276346	rhophilin associated tail protein 1-like
RENBP	RENBP	ILMN_1780057	5973	NM_002910	0.601746	1.51755	7.24535e-05	0.0137117	renin binding protein
ALDH3B1	ALDH3B1	ILMN_1728662	221	NM_000694	0.601594	1.51739	0.00023054	0.0219463	aldehyde dehydrogenase 3 family member B1
LOC653907	LOC653907	ILMN_1711611	NA	XM_936496	0.598678	1.51433	0.000429728	0.0299109	NA
PFKFB4	PFKFB4	ILMN_1653292	5210	NM_004567	0.596182	1.51171	1.1255e-05	0.00598309	6-phosphofructo-2-kinase/fructose-2,6-biphosphatase 4
PILRA	PILRA	ILMN_2362858	29992	NM_178272	0.594823	1.51029	0.000119573	0.0161953	paired immunoglobin-like type 2 receptor alpha
CEBPD	CEBPD	ILMN_1782050	1052	NM_005195	0.593641	1.50905	0.000273645	0.0239754	CCAAT/enhancer binding protein delta
C9orf167	TOR4A	ILMN_1813641	54863	NM_017723	0.592325	1.50767	0.000127809	0.0165668	torsin family 4 member A
TGM2	TGM2	ILMN_1679267	7052	NM_198951	0.590502	1.50577	0.000417901	0.0295152	transglutaminase 2
ANRIL	CDKN2B-AS1	ILMN_1887731	100048912	NR_003529	0.589279	1.50449	0.000348721	0.0270915	CDKN2B antisense RNA 1
FCN1	FCN1	ILMN_1668063	2219	NM_002003	0.588398	1.50358	3.68815e-06	0.00392637	ficolin 1
AMY1B	AMY1B	ILMN_1726327	277	NM_001008218	0.588286	1.50346	3.33971e-05	0.00969377	amylase, alpha 1B (salivary)
SLC11A1	SLC11A1	ILMN_1741165	6556	NM_000578	0.588282	1.50346	0.000492823	0.0322965	solute carrier family 11 member 1
KIAA0319L	KIAA0319L	ILMN_1683277	79932	NM_024874	0.588027	1.50319	5.7426e-05	0.0117617	KIAA0319 like
QSOX1	QSOX1	ILMN_2411282	5768	NM_001004128	0.587641	1.50279	5.43028e-05	0.0116695	quiescin sulfhydryl oxidase 1
YIF1B	YIF1B	ILMN_1773687	90522	NM_001031731	0.587169	1.5023	0.000103478	0.0155906	Yip1 interacting factor homolog B, membrane trafficking protein
C1orf38	THEMIS2	ILMN_1735143	9473	NM_004848	0.587008	1.50213	0.00030906	0.0256365	thymocyte selection associated family member 2
AGPAT2	AGPAT2	ILMN_1732176	10555	NM_006412	0.58648	1.50158	0.000190671	0.0201813	1-acylglycerol-3-phosphate O-acyltransferase 2
ECM1	ECM1	ILMN_2329735	1893	NM_022664	0.585911	1.50099	0.000189501	0.0201476	extracellular matrix protein 1
RBM47	RBM47	ILMN_3306730	54502	NM_019027	0.585316	1.50037	0.00088518	0.0432641	RNA binding motif protein 47
PAQR4	PAQR4	ILMN_1660793	124222	NM_152341	0.585165	1.50021	0.00111331	0.0484837	progestin and adipoQ receptor family member IV
RNF135	RNF135	ILMN_1700660	84282	NM_197939	0.585139	1.50018	4.15991e-05	0.0103586	ring finger protein 135
