# Supplementary material for: Integration of Genome-Wide DNA Methylation and Transcription Uncovered Aberrant Methylation-Regulated Genes and Pathways in the Peripheral Blood Mononuclear Cells of Systemic Sclerosis
Source: Int J Rheumatol. 2018 Sep 2;2018:7342472. doi: 10.1155/2018/7342472 (PMC6139224; doi:10.1155/2018/7342472)
Supplement: Supplementary 4 — Supplementary Table 3: the complete list of differentially methylated positions (DMPs) identified in PBMC of SSc patients. [file 7342472.f4.xlsx]

## Sheet: hypomethylated_sites
Supplemental Table 3-1. Methylation sites significantly hypomethylated in SSc vs Normal
Infinium Probe Name	Feature	CGI	Gene name	deltaBeta	P.Value	BH.P.Value
cg22930808	5'UTR	shore	PARP9	-0.278639	5.25e-06	0.00069531
cg21549285	5'UTR	shore	MX1	-0.268176	8.86e-05	0.00245606
cg05696877	5'UTR	opensea	IFI44L	-0.265561	3.14e-05	0.0014503
cg00959259	5'UTR	shore	PARP9	-0.254614	1.94e-06	0.000488656
cg03607951	TSS1500	opensea	IFI44L	-0.219934	4.4e-06	0.000645338
cg10632894	Body	shore	HLA-DRB1	-0.216721	0.00248731	0.0216484
cg05552874	Body	opensea	IFIT1	-0.2159	2.18e-05	0.00122462
cg08122652	5'UTR	shore	PARP9	-0.210792	6.5e-05	0.00207658
cg06872964	TSS1500	opensea	IFI44L	-0.210483	1.05e-06	0.000405671
cg22862003	TSS1500	shore	MX1	-0.197788	1.24e-05	0.000956419
cg06981309	5'UTR	shore	PLSCR1	-0.192391	8.44e-07	0.000383754
cg15820961	TSS1500	opensea	HLA-DRB1	-0.178271	0.00227125	0.0203114
cg25344401	Body	shelf	FOXK1	-0.170406	2.19e-05	0.00122646
cg01028142	Body	shore	CMPK2	-0.168022	3.55e-05	0.0015334
cg19990651	Body	island	HLA-DPB1	-0.167387	0.000153378	0.00337057
cg03418002	Body	shore	MAML3	-0.166584	1.11e-05	0.000915443
cg26312951	TSS200	shore	MX1	-0.164701	4.79e-05	0.00177105
cg02520804	5'UTR	shore	FOXP1	-0.163701	1.17e-05	0.000936165
cg07275179	Body	opensea	ATXN7	-0.163626	4.08e-05	0.00164013
cg25084760	Body	opensea	PCCA	-0.163201	1.86e-06	0.00048343
cg02770745	Body	opensea	STIM1	-0.162827	4.48e-06	0.000649782
cg08279189	Body	opensea	TRIM27	-0.162093	4.78e-05	0.00177105
cg24474182	Body	opensea	MED12L	-0.160701	6.26e-05	0.00203578
cg05994974	Body	shore	PARP12	-0.159916	6.45e-07	0.000353228
cg23568192	IGR	opensea	NA	-0.158965	7.26e-06	0.000770527
cg16506970	5'UTR	opensea	KIAA0232	-0.158141	0.000107542	0.0027378
cg10028625	Body	opensea	ECT2	-0.157983	3.35e-05	0.00149129
cg09467433	IGR	opensea	NA	-0.156546	2.1e-05	0.00120129
cg20090290	Body	opensea	AMBRA1	-0.155952	5.35e-06	0.000699257
cg02160684	Body	shelf	TRIB1	-0.155712	5.09e-05	0.00182944
cg00446046	IGR	opensea	NA	-0.155617	1.15e-05	0.000930415
cg10827754	IGR	shelf	NA	-0.155479	1.27e-05	0.000965892
cg10371414	IGR	opensea	NA	-0.155395	2.36e-07	0.000298618
cg10456459	3'UTR	opensea	ETNK1	-0.155247	2.93e-05	0.00140149
cg27183173	Body	island	PALM	-0.155227	0.00429251	0.0319204
cg14516183	Body	opensea	SEC22A	-0.155085	8.94e-06	0.000838108
cg07839457	TSS1500	shore	NLRC5	-0.155069	0.000305743	0.00517328
cg04739200	Body	opensea	MYB	-0.155068	3.57e-05	0.00153663
cg16226866	IGR	opensea	NA	-0.15465	2.41e-05	0.00127965
cg22957691	Body	opensea	FEZ2	-0.154156	6.98e-05	0.00215699
cg25938803	Body	opensea	THADA	-0.153744	1.99e-05	0.00117773
cg09140723	Body	opensea	SGPL1	-0.153595	1.21e-05	0.00094911
cg25576997	Body	opensea	C14orf34	-0.153445	3.52e-05	0.00152718
cg16788865	IGR	shore	NA	-0.153381	1.33e-05	0.000983555
cg20780105	Body	shelf	C5orf43	-0.153377	1.47e-05	0.00102602
cg01861537	IGR	opensea	NA	-0.152836	2.21e-05	0.00123196
cg27573991	1stExon	opensea	C1orf150	-0.152659	0.00457791	0.0334366
cg04225088	TSS1500	shore	HIPK3	-0.152057	1.08e-05	0.000902227
cg04205769	Body	shelf	DPH5	-0.151981	3.51e-05	0.00152558
cg02182476	Body	opensea	LOC100128573	-0.151975	2.74e-05	0.0013563
cg13304609	TSS1500	opensea	IFI44L	-0.151927	6.4e-05	0.00205946
cg19023589	Body	shelf	TMCO3	-0.151885	2.49e-05	0.00129677
cg10447327	Body	shelf	LANCL1	-0.151837	6.59e-06	0.00074353
cg24168002	Body	opensea	LASS6	-0.151803	1.08e-05	0.000903002
cg19828970	5'UTR	opensea	NCK2	-0.15158	1.08e-05	0.000905607
cg00625110	Body	shelf	FTO	-0.151477	1.43e-06	0.000445609
cg02243157	IGR	opensea	NA	-0.151443	7.54e-05	0.00225066
cg09571972	Body	opensea	GMDS	-0.151335	1.33e-06	0.000438694
cg02193956	Body	shore	MANBA	-0.151334	1.06e-05	0.000897137
cg02096172	IGR	opensea	NA	-0.151008	0.00280077	0.0235606
cg20222562	IGR	opensea	NA	-0.150875	1.7e-05	0.00109468
cg24504349	IGR	opensea	NA	-0.150858	3.49e-05	0.00152206
cg25437886	Body	opensea	LIMD1	-0.150748	3.69e-05	0.00156139
cg11908131	Body	shelf	C2orf40	-0.150732	3.16e-05	0.00145318
cg02190353	Body	opensea	SLC25A37	-0.150686	8.16e-05	0.00234659
cg19584136	Body	opensea	MXI1	-0.150627	3.27e-05	0.00147403
cg09697978	Body	opensea	PRKD3	-0.150328	3.12e-05	0.00144626
cg06373940	TSS1500	shore	ERCC3	-0.150283	3.63e-05	0.00154808
cg24496021	Body	opensea	FCHSD2	-0.150001	8.57e-05	0.00241161
cg14187687	Body	opensea	SAMD4A	-0.149791	1.12e-05	0.000919631
cg04552418	IGR	opensea	NA	-0.14979	3.17e-05	0.0014563
cg24406240	IGR	opensea	NA	-0.149683	8.89e-06	0.000835991
cg23506143	IGR	opensea	NA	-0.149636	2.84e-06	0.000564986
cg19410609	IGR	opensea	NA	-0.149558	8.57e-06	0.000826068
cg07291836	TSS1500	shore	TP53RK	-0.149457	3.86e-05	0.00159879
cg00699569	IGR	opensea	NA	-0.149375	1.59e-06	0.000458867
cg07197493	Body	opensea	SBF2	-0.149288	1.33e-05	0.000983061
cg17591816	Body	opensea	DNM3	-0.149242	6.15e-07	0.000348591
cg23363263	Body	opensea	WDFY1	-0.149174	3.86e-05	0.00159817
cg11833768	Body	opensea	PPP2R5E	-0.149173	2.37e-05	0.0012703
cg27307183	5'UTR	opensea	CDYL	-0.149042	5.52e-06	0.000703921
cg24175188	Body	opensea	PXK	-0.149007	1.65e-05	0.00107981
cg02307823	Body	opensea	PTEN	-0.148944	2.8e-05	0.00137057
cg04603130	5'UTR	shelf	GNG7	-0.148877	1.2e-05	0.000944419
cg13381110	Body	opensea	PHLPP1	-0.148713	5.92e-05	0.00197924
cg01178099	IGR	opensea	NA	-0.148513	5.77e-06	0.000716433
cg12405599	TSS1500	shore	RPN1	-0.14811	1.41e-05	0.00100828
cg17069914	IGR	shelf	NA	-0.148004	1.92e-05	0.00115508
cg09183124	IGR	opensea	NA	-0.147689	0.000135492	0.00313315
cg06881398	Body	opensea	USP24	-0.1476	3.5e-05	0.00152289
cg22675447	5'UTR	shelf	NIPAL3	-0.147243	4.88e-07	0.000333013
cg00235484	Body	opensea	MAP7	-0.147223	2.52e-05	0.00130513
cg05000446	1stExon	opensea	C9orf131	-0.14717	2.16e-05	0.00121789
cg19635401	Body	opensea	C6orf204	-0.147161	5.09e-05	0.0018302
cg12754495	TSS200	opensea	P2RY12	-0.147132	9.27e-05	0.0025207
cg27434890	Body	opensea	MYB	-0.147102	2.09e-05	0.00119968
cg16998950	Body	opensea	ELL2	-0.146975	5.91e-05	0.00197715
cg14578677	TSS1500	opensea	TLR6	-0.146927	2.76e-05	0.00136131
cg23745290	Body	shelf	PPA2	-0.146923	2.36e-05	0.00126955
cg06719445	5'UTR	opensea	FOXN3	-0.14689	4.39e-05	0.00170133
cg07283015	TSS1500	opensea	HRH4	-0.146776	2.54e-05	0.00130728
cg07302959	Body	opensea	FAM133B	-0.146659	1.63e-05	0.00107402
cg09417547	IGR	opensea	NA	-0.146568	6.32e-06	0.000734633
cg09145126	TSS1500	shore	TRIM13	-0.146476	1.54e-06	0.00045583
cg14703454	5'UTR	opensea	HHLA2	-0.146291	3e-05	0.00141721
cg14801692	Body	island	HLA-DPB1	-0.146272	0.00241694	0.0212174
cg20312012	Body	opensea	FER1L5	-0.146148	6.34e-05	0.00204862
cg15210526	Body	opensea	MPZL1	-0.146108	3.67e-05	0.00155713
cg20107506	IGR	shelf	NA	-0.145951	4.4e-05	0.00170277
cg03048029	TSS1500	shore	SYNJ1	-0.145931	5.45e-05	0.00189505
cg07480762	TSS200	opensea	PLCH1	-0.145897	3.91e-06	0.000618303
cg23670353	Body	opensea	FGGY	-0.145815	6.24e-06	0.00073074
cg04244170	Body	shelf	TOMM70A	-0.1456	4.11e-06	0.000630513
cg01079652	Body	opensea	IFI44	-0.145546	0.000115053	0.0028493
cg03463948	Body	opensea	UBASH3B	-0.1454	2.44e-05	0.00128398
cg13977235	IGR	shelf	NA	-0.145341	7.77e-05	0.00228812
cg14985891	Body	opensea	CASQ2	-0.145333	0.00010589	0.00271418
cg14480116	TSS1500	opensea	SPRED2	-0.145137	2.44e-05	0.00128416
cg13304638	Body	opensea	TBCD	-0.144992	0.000125954	0.00300074
cg23772226	IGR	opensea	NA	-0.144698	7.92e-06	0.000800091
cg00842918	TSS1500	opensea	GAS7	-0.144579	7.58e-05	0.00225737
cg23137881	Body	opensea	C4orf45	-0.144552	0.000153995	0.00337748
cg18854765	TSS1500	shore	LRRIQ3	-0.144541	1.23e-05	0.000953154
cg01586609	Body	opensea	HTR3A	-0.144504	1.39e-05	0.00100332
cg06407843	IGR	shelf	NA	-0.144384	2.69e-05	0.0013433
cg25181170	Body	opensea	PRTFDC1	-0.144375	9.66e-06	0.000863761
cg01766396	3'UTR	opensea	RFTN2	-0.144349	7.19e-06	0.000768162
cg02399831	IGR	opensea	NA	-0.14429	3.17e-05	0.00145631
cg23342367	Body	opensea	TPD52	-0.144193	8.13e-05	0.00234135
cg03546163	5'UTR	shore	FKBP5	-0.144056	5.85e-05	0.00196874
cg06102602	IGR	opensea	NA	-0.143947	7.5e-06	0.000781933
cg00923880	IGR	shore	NA	-0.143933	0.00123591	0.0131647
cg24405567	IGR	opensea	NA	-0.143674	1.75e-06	0.000472859
cg14044785	Body	opensea	THADA	-0.143642	1.21e-05	0.000947159
cg08165796	IGR	opensea	NA	-0.143597	4.33e-05	0.0016897
cg00188748	TSS1500	shore	FPGS	-0.143563	2.41e-07	0.000298618
cg03797115	TSS1500	shore	CASP6	-0.143534	1.49e-05	0.0010316
cg03187073	5'UTR	opensea	CDYL	-0.143331	1.69e-05	0.00109143
cg23548201	TSS1500	shore	TNK2	-0.143281	4.69e-06	0.000659695
cg02927682	Body	opensea	SSBP3	-0.143001	2.56e-06	0.000541769
cg03714676	Body	shore	KIAA0146	-0.142997	4.39e-06	0.000645271
cg17142183	TSS200	opensea	IL1R2	-0.142981	2.86e-05	0.00138411
cg19430537	IGR	island	NA	-0.142955	0.000127555	0.00302364
cg07205203	IGR	opensea	NA	-0.142931	3.73e-06	0.000611195
cg25197500	Body	opensea	WDR45L	-0.142862	4.33e-05	0.0016897
cg02227879	Body	opensea	CAMK2G	-0.142833	5.16e-05	0.00184101
cg21648069	Body	opensea	ERC1	-0.142734	5.18e-05	0.001845
cg04452195	3'UTR	shelf	GJB2	-0.14265	7.23e-05	0.0021969
cg13581015	IGR	shore	NA	-0.142471	7.26e-06	0.000770527
cg07472373	Body	opensea	DRGX	-0.142416	5.59e-05	0.00191886
cg08300570	Body	opensea	CDK6	-0.142331	5.49e-05	0.00190146
cg02806156	IGR	opensea	NA	-0.142304	9.28e-05	0.00252203
cg17090611	Body	shelf	ZDHHC2	-0.142262	7.1e-05	0.00217481
cg05310486	IGR	shelf	NA	-0.142186	0.000165879	0.00353691
cg06298740	IGR	shore	NA	-0.142147	1.46e-06	0.00044702
cg07772516	3'UTR	opensea	TMOD2	-0.141783	8.9e-06	0.000835991
cg05875463	Body	shore	PHLPP1	-0.141717	1.02e-05	0.000883759
cg04781916	Body	shelf	MSH6	-0.141672	0.000103537	0.002681
cg12564102	IGR	opensea	NA	-0.141521	1.61e-05	0.00106697
cg00009088	TSS1500	shore	VPS37C	-0.141451	0.00034047	0.00554201
cg15935770	Body	opensea	KIAA0247	-0.141352	2.13e-05	0.00120852
cg17541002	5'UTR	shelf	CAMKK2	-0.141259	5.66e-05	0.00193168
cg24746726	TSS1500	opensea	SULT1E1	-0.141205	9.87e-06	0.000871914
cg07212327	5'UTR	shelf	FAM49B	-0.141053	0.000127698	0.00302518
cg21821982	IGR	opensea	NA	-0.141015	1.27e-05	0.000965892
cg25919177	IGR	shelf	NA	-0.14099	9.24e-05	0.00251385
cg21492378	TSS1500	opensea	CEP110	-0.140989	5.7e-05	0.00194015
cg09290120	TSS1500	shore	GPD2	-0.140982	2.42e-07	0.000300151
cg04605532	IGR	opensea	NA	-0.140954	1.35e-05	0.000988437
cg11083848	Body	opensea	TTLL5	-0.140922	3.1e-05	0.00144262
cg23334433	Body	shelf	AATK	-0.140889	5.98e-05	0.00199019
cg02353916	3'UTR	opensea	LOC285550	-0.14067	0.000256026	0.00462424
cg00382999	Body	opensea	NCK1	-0.140593	3.9e-05	0.00160867
cg13226290	TSS200	shore	NSFL1C	-0.140568	2.13e-05	0.0012094
cg21893651	Body	opensea	NCRNA00171	-0.140546	9.03e-06	0.000839845
cg08359464	TSS1500	shore	RPN1	-0.140517	1.28e-05	0.000968698
cg25199552	Body	shelf	KDM1A	-0.140419	7.97e-06	0.000802052
cg08287940	IGR	opensea	NA	-0.140261	0.00010573	0.00271178
cg22712983	TSS1500	shore	PNKD	-0.14018	4.62e-05	0.00174337
cg21141827	3'UTR	opensea	ETF1	-0.14016	4.54e-05	0.00172649
cg21199093	Body	opensea	ZMYM4	-0.140124	3.29e-05	0.00147566
cg10426076	TSS200	opensea	PRG2	-0.140027	1.24e-05	0.000956872
cg07110356	Body	island	MPO	-0.140016	6.18e-07	0.000348591
cg01924292	5'UTR	opensea	ADIPOR2	-0.139997	2.09e-05	0.00119861
cg01763719	IGR	opensea	NA	-0.139903	5.99e-05	0.00199033
cg10752508	TSS1500	shore	CPOX	-0.139789	7.91e-06	0.000799695
cg20008101	TSS1500	shore	LGALS3	-0.139683	2.83e-05	0.00137611
cg06660522	IGR	opensea	NA	-0.139659	3.33e-05	0.001486
cg13633625	IGR	opensea	NA	-0.13965	4e-05	0.00162771
cg02381279	IGR	shore	NA	-0.139639	1.32e-05	0.000981806
cg13999433	TSS200	shelf	AKNA	-0.139636	1.42e-05	0.0010114
cg00828556	IGR	opensea	NA	-0.139483	4.74e-07	0.0003318
cg17313269	5'UTR	opensea	TRIM38	-0.139454	2.23e-05	0.00123553
cg16762030	IGR	opensea	NA	-0.139396	4.82e-05	0.00177751
cg16452651	5'UTR	shore	ITSN1	-0.13936	2.88e-05	0.00138997
cg16422316	TSS1500	shore	AP1G1	-0.139162	1.19e-05	0.000942902
cg13703437	TSS200	opensea	FYB	-0.139089	3.98e-06	0.000622797
cg09059466	Body	shore	HLA-DPB1	-0.139082	0.000192861	0.00387399
cg06885823	IGR	opensea	NA	-0.139034	6.63e-06	0.000744389
cg08126118	Body	opensea	ENOX1	-0.139003	1.86e-05	0.00113825
cg05642546	Body	opensea	ELMO1	-0.138984	3.93e-06	0.00061868
cg15818008	Body	opensea	C11orf34	-0.138968	9.84e-06	0.00087066
cg24914483	IGR	shore	NA	-0.138934	4.05e-05	0.00163508
cg16624482	Body	shore	UMODL1	-0.138764	7.99e-06	0.000803154
cg00765705	Body	opensea	NCOR2	-0.138721	1.72e-06	0.000472859
cg23445003	Body	opensea	CUX1	-0.138443	7.84e-05	0.0022954
cg22152931	Body	opensea	PRKRIP1	-0.138376	3.24e-06	0.000589533
cg15590153	TSS1500	shore	PGM1	-0.138092	1.57e-05	0.00105726
cg15609734	Body	shelf	STAM	-0.138092	9.99e-05	0.00262408
cg15285436	Body	opensea	BCAS3	-0.138089	7.39e-05	0.00222553
cg20704555	Body	opensea	JAZF1	-0.138077	5.97e-05	0.00198831
cg01591037	3'UTR	opensea	PDE6H	-0.13803	5.5e-05	0.00190228
cg02262553	IGR	opensea	NA	-0.137959	6.26e-06	0.000731683
cg11814087	Body	opensea	ZFR	-0.137783	6.81e-06	0.000751763
cg03664994	Body	opensea	RTN4	-0.137726	3.36e-05	0.00149381
cg14016236	5'UTR	opensea	FNDC3B	-0.137552	2.9e-05	0.00139426
cg05252264	1stExon	opensea	FCAR	-0.137473	3.29e-05	0.00147672
cg13057663	IGR	opensea	NA	-0.137467	2.84e-05	0.00137942
cg21852792	IGR	shelf	NA	-0.137414	0.000122931	0.00296088
cg08764162	Body	opensea	ZNF438	-0.137381	2.39e-05	0.00127461
cg02105211	Body	opensea	ITPR1	-0.137262	4.18e-05	0.00166114
cg01822050	IGR	shore	NA	-0.137086	1.85e-05	0.00113726
cg25511667	Body	island	HLA-DPB1	-0.13699	0.00386493	0.0296167
cg15382933	5'UTR	opensea	CD59	-0.136934	8.68e-06	0.000828833
cg01982833	TSS1500	shore	MED21	-0.136826	9.03e-06	0.000839845
cg24608504	Body	opensea	SPTBN1	-0.136793	0.000206516	0.00404289
cg08539965	5'UTR	opensea	EIF4G3	-0.136785	4.12e-05	0.00164952
cg00453717	Body	opensea	POLD3	-0.136781	2.41e-05	0.00127965
cg00168694	Body	shore	ETS2	-0.136679	3.84e-05	0.001595
cg21991396	5'UTR	opensea	NLRP3	-0.136667	7.91e-05	0.00230621
cg14685356	Body	opensea	SYNE1	-0.136575	2.62e-05	0.00132552
cg17980508	TSS1500	opensea	IFI44L	-0.136508	1.86e-06	0.00048343
cg02253142	5'UTR	shelf	TMOD2	-0.136438	0.000159746	0.00345349
cg12866960	Body	opensea	IRAK3	-0.136434	0.000235988	0.00439148
cg07033722	3'UTR	opensea	PPT1	-0.136408	3.31e-05	0.00148283
cg04993279	IGR	shore	NA	-0.136363	3.58e-05	0.00153804
cg17934470	IGR	shelf	NA	-0.13636	1.49e-05	0.00103002
cg23210971	Body	opensea	AFF1	-0.136286	6.9e-05	0.00214512
cg02067584	TSS1500	shore	C17orf59	-0.136243	0.000132385	0.00309119
cg20956594	IGR	opensea	NA	-0.136225	2.64e-06	0.000547009
cg21188533	Body	opensea	CACNA1D	-0.136071	0.00138387	0.0142692
cg27365701	Body	shore	DUSP6	-0.136045	4.95e-06	0.000676912
cg07125981	Body	opensea	CUL2	-0.135975	2.66e-05	0.00133394
cg25448856	Body	opensea	EEA1	-0.135934	0.000105816	0.00271278
cg10958452	TSS1500	shore	KDM4A	-0.13587	4.45e-05	0.00171051
cg24743156	TSS1500	shore	CTAGE5	-0.13584	4.62e-05	0.00174337
cg21184369	TSS1500	shore	HTRA4	-0.135754	0.000103409	0.00267867
cg17627898	5'UTR	opensea	TAOK3	-0.135735	1.05e-05	0.000895488
cg17036458	Body	opensea	SSH2	-0.135642	0.000671254	0.00866692
cg14022913	TSS1500	shore	NEIL3	-0.135606	7.5e-05	0.00224333
cg14417099	Body	shelf	PCMT1	-0.135606	5.99e-05	0.00199035
cg08036492	Body	shelf	COX10	-0.135465	1.36e-05	0.000990721
cg23213327	TSS1500	opensea	RSAD2	-0.135446	6.81e-06	0.000751763
cg14028598	IGR	shelf	NA	-0.135445	7.2e-05	0.00219123
cg13870520	Body	shelf	SCARB2	-0.135428	1.09e-05	0.000908909
cg06739107	Body	opensea	LPP	-0.135331	5.55e-05	0.00191435
cg12049550	Body	opensea	CACHD1	-0.135313	4.58e-05	0.00173477
cg10826999	IGR	shelf	NA	-0.135307	9.68e-05	0.0025807
cg15612945	5'UTR	shelf	VPS54	-0.135141	0.000160603	0.00346417
cg02506984	Body	shelf	RHEB	-0.135067	2.24e-05	0.00123763
cg13277939	TSS1500	shore	CTAGE5	-0.135017	3.43e-05	0.00150951
cg03568673	3'UTR	opensea	GJB6	-0.13499	4.07e-05	0.00163787
cg02677635	Body	shore	FAM125B	-0.134908	2.73e-05	0.00135295
cg10789956	Body	opensea	DPYSL2	-0.134875	1.23e-05	0.000954063
cg12940181	IGR	opensea	NA	-0.134792	4.27e-05	0.00167792
cg25305879	IGR	shelf	NA	-0.134708	1.82e-05	0.00112945
cg09271097	Body	opensea	CREB3L2	-0.13466	4.64e-05	0.0017472
cg05025071	TSS200	opensea	EMR1	-0.134638	0.000130088	0.00306009
cg18897025	3'UTR	opensea	TSLP	-0.134613	0.000161088	0.00347086
cg13536447	IGR	opensea	NA	-0.134596	0.00010797	0.00274397
cg22694271	Body	shore	PSRC1	-0.134538	2.95e-05	0.00140786
cg14754555	1stExon	shore	GPD2	-0.134532	1.78e-06	0.000476496
cg15142192	3'UTR	opensea	EIF2C3	-0.13447	0.000111641	0.00279943
cg22820233	1stExon	opensea	FCAR	-0.134445	7.81e-05	0.00229207
cg02551745	IGR	shelf	NA	-0.134442	3.75e-06	0.000612519
cg11638399	IGR	opensea	NA	-0.134423	8.28e-05	0.00236529
cg12249234	5'UTR	opensea	KSR1	-0.134342	1.73e-05	0.00110088
cg20242427	3'UTR	opensea	DAK	-0.134333	3.5e-05	0.00152453
cg17356733	TSS1500	shore	IFNGR2	-0.134325	7.69e-05	0.00227527
cg11606261	5'UTR	shore	SP1	-0.134306	8.91e-07	0.000388712
cg07481273	3'UTR	shore	C14orf109	-0.134306	1.44e-05	0.00101686
cg24058365	Body	opensea	SLC16A4	-0.134202	3.31e-05	0.00148283
cg10721755	3'UTR	opensea	TRAF5	-0.134141	3.77e-05	0.00157916
cg14101485	Body	island	NFIC	-0.134121	1.55e-05	0.00105118
cg04747180	Body	opensea	KLHL5	-0.134061	2.47e-05	0.00129357
cg10061770	Body	opensea	PRMT7	-0.133938	2.12e-06	0.000499919
cg00899659	Body	shore	C10orf25	-0.13386	1.19e-06	0.000424808
cg22713444	Body	shelf	GNRHR2	-0.133818	5.95e-05	0.00198413
cg17301248	3'UTR	opensea	NAA25	-0.133795	4.05e-05	0.00163508
cg06122230	Body	opensea	ZNFX1	-0.13377	2.36e-05	0.00126881
cg16378063	IGR	opensea	NA	-0.133664	0.000124244	0.0029796
cg14575356	Body	opensea	ARHGAP18	-0.133636	4.1e-05	0.00164445
cg16396191	Body	opensea	KIAA0564	-0.133616	0.000156336	0.00340934
cg02656594	TSS1500	opensea	IL21R	-0.133606	8.63e-06	0.000827582
cg08773226	IGR	opensea	NA	-0.133588	4.46e-05	0.00171256
cg04730794	Body	opensea	DOCK2	-0.133558	7.74e-05	0.00228314
cg09046309	Body	opensea	ZMYND8	-0.133542	7.71e-05	0.00227854
cg01023672	IGR	shelf	NA	-0.13335	2.84e-05	0.00138162
cg09727050	5'UTR	opensea	TNFAIP6	-0.133343	0.000287385	0.00497343
cg02796279	IGR	opensea	NA	-0.133297	7.72e-05	0.00228118
cg03340036	TSS1500	shore	PIGY	-0.133253	0.000153737	0.00337454
cg23169883	Body	shelf	ADAMTS14	-0.133247	2.65e-05	0.00133224
cg12306086	5'UTR	opensea	TET2	-0.13324	5.32e-05	0.00187112
cg27664407	TSS1500	opensea	C16orf89	-0.133235	1e-05	0.000879643
cg12709880	Body	shelf	NPC1	-0.133157	2.59e-05	0.00131861
cg07227049	Body	opensea	VRK2	-0.133138	0.000285251	0.00495228
cg26298914	Body	opensea	RAD51L1	-0.133119	0.000143378	0.00324132
cg05171937	TSS1500	shore	STK38L	-0.133043	1.12e-05	0.000919631
cg20227511	Body	shelf	FLT3	-0.13304	3.25e-05	0.00147106
cg02705958	IGR	opensea	NA	-0.133029	6.58e-05	0.00209135
cg16441068	Body	opensea	RCOR1	-0.133016	0.000343295	0.0055738
cg15427793	1stExon	opensea	ZNF117	-0.132981	0.00270655	0.0230063
cg04858164	Body	opensea	TCF12	-0.132893	0.000358817	0.00573797
cg16163847	Body	opensea	WDFY2	-0.132864	2.43e-05	0.00128285
cg09978533	IGR	shore	NA	-0.132807	2.72e-07	0.000302715
cg19351604	Body	opensea	ARHGEF10	-0.13279	2.36e-05	0.00126961
cg06465076	Body	opensea	CAST	-0.132768	0.000157596	0.00342705
cg21242009	IGR	opensea	NA	-0.132746	0.00198415	0.0184338
cg10220544	Body	opensea	FGGY	-0.132702	1.41e-05	0.00100782
cg22481695	IGR	shelf	NA	-0.132656	8.99e-05	0.00247505
cg15312943	Body	opensea	SERGEF	-0.132516	5.7e-05	0.00193978
cg00682263	3'UTR	opensea	MEGF11	-0.132466	2.42e-05	0.00128207
cg14414154	Body	shelf	APP	-0.132443	0.00016742	0.00355542
cg19082496	IGR	shelf	NA	-0.132358	3.31e-05	0.00148102
cg20098015	TSS200	shore	ODF3B	-0.132338	0.000648208	0.00847502
cg01261013	TSS1500	shore	MORC3	-0.132337	6.73e-06	0.000749076
cg11703212	Body	opensea	TFDP1	-0.132326	0.000119769	0.00291558
cg26928972	TSS1500	opensea	CSTA	-0.132272	0.000167835	0.0035599
cg24493367	5'UTR	opensea	GSTCD	-0.132245	3.2e-05	0.00146111
cg05991009	Body	opensea	RFX8	-0.132227	3.18e-05	0.00145693
cg03371275	Body	opensea	MAML2	-0.132217	2.67e-05	0.00133861
cg18517055	Body	opensea	WDR45L	-0.132211	3.33e-05	0.00148666
cg27019717	5'UTR	opensea	GNG2	-0.132199	7.82e-05	0.00229388
cg09205945	Body	opensea	CREB3L2	-0.132137	5.02e-05	0.00181753
cg12401842	TSS200	opensea	CLEC4A	-0.132131	7.44e-05	0.0022344
cg18537222	Body	opensea	PPARG	-0.132108	0.000153232	0.00336923
cg17692230	IGR	opensea	NA	-0.132099	1.85e-05	0.00113672
cg11597277	TSS200	opensea	SUMO1P1	-0.132094	0.000156664	0.00341348
cg01058360	Body	opensea	PRKAG2	-0.132069	3.1e-05	0.00144268
cg13599613	Body	opensea	SH2D3C	-0.132009	7.41e-05	0.00223071
cg18507018	Body	opensea	TMEM55A	-0.132007	0.000638309	0.00838748
cg08628635	Body	opensea	E2F3	-0.131962	9.59e-05	0.00256822
cg26381210	5'UTR	opensea	BMPR1A	-0.131958	2.05e-05	0.00118939
cg26942829	Body	opensea	GFOD1	-0.131952	0.000134592	0.00312225
cg26253663	IGR	shore	NA	-0.131934	1.46e-05	0.00102375
cg21574244	Body	shelf	GANC	-0.131842	4.48e-05	0.00171623
cg18997983	Body	island	SLC12A7	-0.131822	2.11e-06	0.000498283
cg27176729	TSS1500	shore	IER5	-0.131817	0.000112121	0.00280579
cg22825487	Body	opensea	VNN3	-0.131803	0.000323357	0.00536004
cg03295274	IGR	opensea	NA	-0.131803	0.00011041	0.00277818
cg07000116	Body	shore	ZNF689	-0.13179	1.87e-05	0.00114187
cg05255811	Body	opensea	KCNK5	-0.131781	2.88e-05	0.00138997
cg00578614	IGR	shore	NA	-0.131769	3.78e-05	0.00158148
cg27606341	1stExon	opensea	FYB	-0.131765	1.23e-05	0.000955688
cg08792630	Body	shore	FOXO3	-0.131703	1.05e-05	0.000896544
cg17889831	TSS1500	shore	DSTYK	-0.131631	4.54e-06	0.000653491
cg10458216	TSS1500	opensea	MBNL2	-0.131622	6.94e-07	0.000358226
cg16402415	5'UTR	shelf	ZNF280D	-0.131612	0.000100534	0.0026337
cg19055828	3'UTR	opensea	DIP2B	-0.131579	0.0004761	0.00690847
cg04525852	5'UTR	shore	ANKRD50	-0.131533	1.42e-05	0.00101021
cg24906819	Body	opensea	PRAGMIN	-0.131434	1.3e-05	0.000975131
cg17463083	Body	opensea	ERN1	-0.131391	1.7e-05	0.00109438
cg16061354	Body	shelf	SLC43A2	-0.131376	8.1e-06	0.000805346
cg01440934	Body	opensea	MKNK1	-0.131366	3.98e-05	0.00162223
cg13603332	Body	opensea	SLC44A1	-0.131306	2.56e-05	0.0013121
cg19582538	IGR	opensea	NA	-0.131221	1.87e-07	0.000292549
cg01925950	Body	opensea	CDC16	-0.131016	3.42e-06	0.000597953
cg04213390	IGR	opensea	NA	-0.13094	0.000234244	0.00436872
cg10934870	Body	shelf	PCYOX1	-0.130918	7.02e-05	0.0021635
cg05240166	5'UTR	shore	TMEM159	-0.130846	6.05e-06	0.000726896
cg21814550	IGR	shelf	NA	-0.130808	0.0001566	0.00341273
cg21090866	Body	opensea	VPS53	-0.130761	0.000162619	0.00348964
cg07211972	3'UTR	shore	CBS	-0.130703	0.000159966	0.00345576
cg02607972	3'UTR	opensea	ASXL2	-0.130655	1.71e-05	0.00109689
cg17951713	IGR	opensea	NA	-0.13064	8.09e-06	0.000805213
cg07375836	5'UTR	shore	ACACA	-0.130554	2.55e-05	0.00130985
cg05061769	IGR	opensea	NA	-0.130553	4.81e-05	0.00177536
cg22169990	Body	shore	AGAP3	-0.130549	2.09e-05	0.00119916
cg27380915	IGR	opensea	NA	-0.130493	4.1e-06	0.000629777
cg01087254	IGR	opensea	NA	-0.130474	0.00020218	0.00399479
cg22626169	IGR	opensea	NA	-0.130457	1.96e-05	0.00116853
cg08241318	IGR	shelf	NA	-0.130294	1.78e-05	0.00111334
cg12893780	Body	island	HLA-DPB1	-0.130285	0.000172421	0.00361698
cg10338518	Body	opensea	AFF1	-0.130259	7.85e-05	0.0022968
cg08700083	Body	opensea	SLAIN2	-0.130187	0.000176692	0.00367231
cg25430838	IGR	opensea	NA	-0.130183	8.02e-05	0.00232471
cg24065504	TSS1500	opensea	ANKRD22	-0.130108	1.25e-05	0.000959371
cg25711558	Body	opensea	CUX1	-0.130076	5.55e-05	0.00191319
cg16041412	IGR	shelf	NA	-0.130065	0.000658455	0.00856175
cg19210276	5'UTR	opensea	CTNND1	-0.129998	2.16e-05	0.00121662
cg12196294	5'UTR	opensea	TMCC1	-0.129987	0.000167991	0.00356131
cg20449670	IGR	opensea	NA	-0.129952	9.13e-05	0.0024978
cg05162858	IGR	opensea	NA	-0.129917	7.02e-06	0.000760433
cg06727242	Body	opensea	RAD51L1	-0.129913	6.98e-06	0.000759629
cg14454680	Body	opensea	C3orf26	-0.1299	8.49e-05	0.00239653
cg08998950	Body	opensea	ITPR1	-0.129881	3.18e-05	0.00145698
cg12602909	IGR	shelf	NA	-0.1298	0.000278955	0.00487937
cg08545593	TSS1500	shore	CTSZ	-0.129717	1.13e-05	0.000921962
cg01521397	Body	shelf	TAF4	-0.129704	0.000165652	0.00353361
cg04904784	IGR	shelf	NA	-0.129685	1.25e-05	0.000958873
cg23302989	3'UTR	opensea	C7orf31	-0.129636	0.000109814	0.00276992
cg13062455	Body	opensea	SEL1L	-0.129624	0.000158735	0.00344147
cg04756491	5'UTR	shelf	RBM23	-0.129564	0.000117975	0.00288791
cg27123392	3'UTR	opensea	GABPB1	-0.129556	6.68e-05	0.00211047
cg23073974	IGR	opensea	NA	-0.129547	2.36e-05	0.00127012
cg27051231	IGR	opensea	NA	-0.129442	6.28e-05	0.00203914
cg20367388	Body	opensea	WIPI2	-0.129397	6.76e-05	0.00212498
cg11557901	IGR	shore	NA	-0.129384	0.000216143	0.00415678
cg20078972	TSS1500	opensea	BRD4	-0.129261	4.81e-05	0.00177537
cg20563269	IGR	shore	NA	-0.129231	1.96e-06	0.00048989
cg16604566	TSS1500	shore	MBP	-0.1292	9.3e-06	0.000850125
cg19673549	IGR	opensea	NA	-0.129107	6.82e-05	0.00213436
cg18141622	IGR	opensea	NA	-0.129089	3.6e-07	0.000325152
cg17714799	TSS1500	shore	CASP6	-0.129081	2.17e-05	0.00122079
cg17785202	IGR	opensea	NA	-0.129077	6.63e-05	0.00210102
cg04903759	Body	opensea	WDR49	-0.12907	0.000204371	0.00401751
cg05971678	Body	opensea	CHST15	-0.129067	3.25e-05	0.0014689
cg23054181	5'UTR	opensea	FAM169B	-0.129061	6.17e-05	0.0020198
cg09234582	Body	shore	HLA-DPB1	-0.129044	0.00302573	0.0248981
cg16097772	1stExon	opensea	LYZ	-0.129043	0.000153941	0.00337666
cg18634760	TSS200	opensea	CPB2	-0.12899	7.29e-05	0.00220839
cg02769705	TSS1500	shore	TMEM183B	-0.128959	3.99e-05	0.00162422
cg19782686	Body	opensea	SPATA5	-0.128851	7.83e-06	0.000796314
cg14533068	Body	island	SYNJ2	-0.128763	4.53e-06	0.00065325
cg03594078	TSS1500	shore	PIWIL2	-0.128748	4.04e-05	0.00163425
cg15835339	Body	opensea	SFTA1P	-0.128679	1.54e-05	0.00104703
cg23625388	Body	opensea	RIN3	-0.128624	4.46e-05	0.00171279
cg05976283	IGR	shelf	NA	-0.128602	5.63e-05	0.00192638
cg19499884	5'UTR	shore	LZTS2	-0.128542	6.32e-06	0.000734453
cg00514723	5'UTR	shore	CHD6	-0.1285	2.46e-07	0.000300478
cg09704136	Body	shelf	ZYX	-0.128448	7.67e-06	0.00078869
cg13298466	Body	shore	IFFO1	-0.128426	0.000105	0.00270232
cg22943115	5'UTR	opensea	PDGFRB	-0.12839	0.000257297	0.00463937
cg01323964	TSS1500	shelf	SNORA22	-0.128368	6.97e-05	0.00215553
cg03998264	Body	opensea	ATF7	-0.128336	7.55e-05	0.00225173
cg11384744	Body	shore	TSPAN13	-0.128306	5.29e-05	0.00186653
cg01366985	IGR	opensea	NA	-0.128296	7.21e-06	0.000768522
cg20661985	Body	shelf	C20orf3	-0.128188	0.000104515	0.00269527
cg24728803	IGR	shore	NA	-0.128184	5.09e-06	0.00068585
cg20048655	IGR	opensea	NA	-0.128182	4.79e-05	0.00177105
cg12645852	IGR	shelf	NA	-0.128175	0.000239812	0.00443352
cg24967811	Body	opensea	PITPNM2	-0.128174	0.000130403	0.00306407
cg05111779	Body	opensea	RGS6	-0.128162	6.32e-05	0.00204486
cg21440776	Body	shore	IFFO1	-0.128154	9.94e-05	0.0026174
cg06311422	Body	shore	DST	-0.128153	8.26e-06	0.00081159
cg17586302	Body	opensea	PHACTR2	-0.128122	0.000287859	0.00497906
cg21932814	1stExon	opensea	CSTA	-0.128019	3.64e-05	0.00155082
cg20765716	TSS200	opensea	ITGAE	-0.128007	1.35e-06	0.000439657
cg20001791	Body	shore	GMPR	-0.128	2.01e-05	0.00118224
cg04313565	Body	opensea	XYLT1	-0.127978	1.41e-05	0.00100694
cg01088404	TSS1500	shore	HDAC7	-0.12787	5.58e-06	0.00070718
cg02538681	TSS200	opensea	ANKRD22	-0.127851	0.000189932	0.0038418
cg19987129	IGR	opensea	NA	-0.127851	6.09e-05	0.00200763
cg07363330	Body	opensea	IL31RA	-0.127764	4.78e-05	0.00177105
cg21500909	5'UTR	shore	TMEM91	-0.127718	7.41e-06	0.000777313
cg21519701	Body	opensea	TEX2	-0.127715	0.000224642	0.0042558
cg10357682	5'UTR	shelf	C20orf27	-0.12768	5.05e-05	0.00182299
cg17837191	5'UTR	opensea	TEX2	-0.127665	4.98e-05	0.00180848
cg02830749	Body	opensea	KIAA0922	-0.127651	3.55e-05	0.00153378
cg17013990	3'UTR	shelf	DEDD	-0.127647	8.8e-05	0.00244694
cg24777950	TSS1500	opensea	CTSG	-0.12764	8.3e-05	0.00236874
cg11639615	IGR	opensea	NA	-0.127594	0.000191286	0.00385647
cg26288715	Body	shelf	MYB	-0.127569	3.7e-05	0.00156332
cg26709988	5'UTR	opensea	CRISPLD2	-0.127491	6.52e-06	0.000741436
cg24401262	IGR	opensea	NA	-0.127348	0.000118734	0.00289933
cg22076474	5'UTR	opensea	BACH1	-0.127341	0.000230168	0.00432091
cg12297590	Body	opensea	ZDHHC14	-0.127336	4.15e-08	0.000209621
cg01719995	TSS1500	shore	USP38	-0.127313	1.22e-06	0.000426465
cg01580228	TSS200	opensea	MIR1304	-0.127251	1.51e-05	0.00103536
cg05148465	IGR	opensea	NA	-0.127243	2e-06	0.00049176
cg17222829	Body	opensea	SHANK2	-0.127233	1.38e-05	0.000999855
cg12774429	3'UTR	shore	CHD8	-0.127214	2.32e-06	0.000515788
cg26548834	Body	opensea	FOXK1	-0.127104	1.51e-05	0.00103553
cg12182708	Body	opensea	MMS19	-0.127002	3.35e-05	0.00149133
cg12162100	5'UTR	shelf	CPNE3	-0.127001	0.000385874	0.0060102
cg08091050	IGR	opensea	NA	-0.126963	5.61e-05	0.00192358
cg20090162	Body	opensea	TTC7A	-0.12696	9.4e-06	0.000853528
cg24760467	5'UTR	shore	LZTS2	-0.126911	1.35e-06	0.000439657
cg05249836	Body	opensea	C22orf9	-0.126884	0.000306621	0.00518389
cg15075988	Body	shelf	VDAC2	-0.126805	4.14e-05	0.00165188
cg07896832	TSS1500	shore	CSPP1	-0.126782	6.03e-06	0.000726896
cg13982956	Body	opensea	PBX3	-0.126773	5.89e-06	0.0007217
cg06030535	IGR	shore	NA	-0.126741	0.000105181	0.00270415
cg17744604	TSS1500	opensea	IL10	-0.126711	3.16e-06	0.000586861
cg00211174	Body	opensea	MCM2	-0.126619	6.15e-05	0.00201658
cg01701649	Body	opensea	N4BP1	-0.126599	0.000103467	0.00267953
cg08850243	5'UTR	opensea	TRIM26	-0.126567	4.65e-05	0.00174811
cg27546431	Body	shelf	MYO1C	-0.126561	2.05e-06	0.000495402
cg27412857	IGR	shore	NA	-0.126479	3.68e-05	0.00155937
cg15980656	Body	opensea	SDC2	-0.126355	0.000196079	0.00391671
cg09136878	IGR	opensea	NA	-0.126349	2.97e-06	0.000570818
cg02041484	5'UTR	opensea	NRF1	-0.126332	5.15e-05	0.00183929
cg09643312	TSS1500	shore	CD302	-0.126263	7.86e-06	0.000797217
cg09163720	Body	opensea	INPP5A	-0.126261	1.08e-05	0.000903341
cg10611016	TSS1500	opensea	C11orf42	-0.126257	8.81e-05	0.00244903
cg02098075	Body	shelf	EFCAB1	-0.126234	6.46e-05	0.00206954
cg18167921	TSS1500	shore	DEPDC1	-0.126229	1.03e-06	0.000402765
cg25025181	Body	opensea	SMYD3	-0.126159	0.000104505	0.00269525
cg24207698	TSS1500	shore	TTC21B	-0.126149	1.16e-05	0.00093333
cg21892720	TSS1500	opensea	LAIR1	-0.126131	1.16e-05	0.000932911
cg04572930	Body	shelf	FOXK1	-0.12612	6.11e-06	0.000727012
cg16647844	IGR	opensea	NA	-0.126089	2.4e-05	0.0012796
cg02579959	TSS1500	shore	FLJ42289	-0.126052	0.000188624	0.00382494
cg04411201	Body	opensea	C3orf26	-0.126038	8.16e-06	0.000807686
cg24553417	Body	opensea	EBPL	-0.126019	7.09e-05	0.00217319
cg16824282	TSS200	opensea	GP9	-0.125978	3.99e-05	0.00162504
cg15058645	5'UTR	opensea	WIPF1	-0.125961	2.08e-05	0.00119743
cg01374870	Body	opensea	HLA-DMB	-0.125956	4.86e-05	0.00178613
cg12744859	TSS200	island	LOC404266	-0.125955	2.7e-07	0.000302715
cg26605164	1stExon	island	KAZALD1	-0.125935	7.31e-06	0.000771476
cg15228694	Body	shelf	CYB5R2	-0.125924	1.36e-05	0.000991723
cg07737292	Body	opensea	MIR138-2	-0.125912	1.47e-05	0.00102508
cg25941751	3'UTR	opensea	EPAS1	-0.125887	6.22e-05	0.00202881
cg06257058	IGR	shelf	NA	-0.125875	2.33e-05	0.00126224
cg11180667	IGR	shelf	NA	-0.125869	0.000578499	0.00785801
cg16672562	5'UTR	shore	HIF3A	-0.125842	0.000122649	0.00295848
cg21058391	IGR	shelf	NA	-0.125811	2.81e-07	0.000304066
cg10376161	Body	shore	ADORA3	-0.125788	9.99e-06	0.000876235
cg00855901	TSS1500	opensea	IFI44L	-0.125775	5.98e-07	0.000348591
cg09789874	IGR	opensea	NA	-0.125714	3.37e-05	0.00149583
cg07488141	5'UTR	opensea	TNS3	-0.125586	2.11e-05	0.00120333
cg27230882	IGR	opensea	NA	-0.125576	3.78e-05	0.00158148
cg17164954	Body	shelf	ARID1B	-0.125574	3e-05	0.00141868
cg26177213	Body	shelf	FOXK1	-0.125573	2.33e-06	0.000517015
cg26746309	Body	shelf	ERLIN1	-0.125545	2.13e-05	0.00120927
cg06317209	TSS1500	opensea	AVIL	-0.125506	5.15e-05	0.00183975
cg19573490	TSS1500	shore	PCYT2	-0.12549	1.73e-05	0.00110134
cg25161129	Body	shore	WIPI1	-0.125483	9.3e-05	0.00252327
cg22491058	TSS200	opensea	C4BPA	-0.125464	8.49e-05	0.0023967
cg17594003	TSS1500	shelf	ZEB2	-0.125459	4.58e-05	0.00173477
cg09572125	Body	opensea	SYNGAP1	-0.125434	1.01e-06	0.000401456
cg25218152	IGR	opensea	NA	-0.125405	5.06e-05	0.00182329
cg20636248	IGR	opensea	NA	-0.125392	4e-05	0.00162778
cg22891070	Body	shore	HIF3A	-0.125355	0.000104173	0.00269082
cg12517576	Body	shore	IMPDH1	-0.12535	7.94e-06	0.00080062
cg03857198	IGR	opensea	NA	-0.125333	5.41e-05	0.00188761
cg19092837	5'UTR	shore	KIF1B	-0.125328	5.55e-05	0.00191435
cg05580141	Body	shelf	C12orf41	-0.125279	0.000108815	0.00275644
cg14059339	Body	opensea	TRIM27	-0.125265	0.000402186	0.00617048
cg07799277	IGR	opensea	NA	-0.125229	7.08e-06	0.000761919
cg17525495	Body	island	BZRAP1	-0.125185	1.3e-05	0.00097663
cg06655349	3'UTR	shelf	S1PR2	-0.125184	0.000239102	0.00442572
cg07063912	Body	shore	LRRFIP1	-0.125148	3.41e-05	0.00150406
cg13984928	TSS200	opensea	ITGAE	-0.125148	5.34e-06	0.000698994
cg15945333	Body	shore	SPI1	-0.125128	9.5e-05	0.00255589
cg08347373	Body	shore	CD302	-0.125123	1.31e-05	0.000977041
cg22077197	Body	opensea	HDAC4	-0.125072	4.8e-06	0.000665643
cg20760057	Body	opensea	ARHGAP18	-0.125056	5.62e-06	0.000709671
cg20165746	Body	opensea	ERI1	-0.124995	1.14e-05	0.000925028
cg05768044	Body	opensea	CHD9	-0.124977	1.85e-05	0.00113717
cg18729704	Body	shelf	PDCD11	-0.124964	2.45e-05	0.00128835
cg12963656	TSS200	opensea	LOC152225	-0.124935	6.98e-05	0.00215688
cg17959183	Body	opensea	RAB10	-0.124934	0.000114944	0.00284806
cg19746186	Body	opensea	FGGY	-0.124931	1.55e-05	0.00104915
cg22381196	TSS1500	shore	DHODH	-0.12492	8.18e-05	0.00234983
cg05057534	Body	opensea	BRE	-0.124917	1.14e-05	0.000926545
cg05655915	TSS1500	shore	NARF	-0.124914	2.62e-05	0.00132671
cg04422741	Body	opensea	MED12L	-0.124914	6.58e-05	0.00209119
cg26828017	IGR	opensea	NA	-0.124909	0.000251553	0.00457357
cg07006935	Body	opensea	VOPP1	-0.124905	1.64e-05	0.00107777
cg01526217	IGR	shore	NA	-0.124893	3.65e-05	0.0015539
cg00980622	IGR	opensea	NA	-0.124892	1.33e-05	0.000983685
cg08399444	Body	opensea	GSG1	-0.124869	4.5e-05	0.00172154
cg22152446	5'UTR	opensea	FRYL	-0.124844	3.86e-05	0.00159943
cg10011091	Body	shelf	SLC25A32	-0.124842	3.96e-05	0.00161873
cg18390025	Body	shore	ELOVL3	-0.124807	4.09e-06	0.000629153
cg03432176	TSS1500	shore	CD302	-0.124794	4.32e-05	0.00168899
cg04089901	Body	opensea	COL28A1	-0.124762	1.82e-05	0.00112852
cg17100158	3'UTR	opensea	ZNF385B	-0.124698	6.32e-05	0.00204588
cg23314364	IGR	opensea	NA	-0.124658	1.32e-05	0.000980577
cg15628518	Body	island	PLEC1	-0.124633	8.61e-08	0.000247874
cg08131309	TSS1500	shore	BMF	-0.124616	3.91e-05	0.00160975
cg16268734	Body	shelf	CS	-0.124604	0.000250277	0.00456023
cg27340480	Body	shelf	PLAUR	-0.124602	7.4e-05	0.00222796
cg20518446	TSS1500	island	AHNAK	-0.124598	7.68e-07	0.000373645
cg24475517	Body	opensea	CCDC93	-0.12459	0.000631521	0.00833536
cg20047349	Body	opensea	ANKFN1	-0.124579	0.00256679	0.0221449
cg05783185	Body	shelf	EXT1	-0.124554	2.92e-05	0.00139962
cg13573582	Body	shelf	RNF220	-0.124518	0.000100602	0.00263437
cg19152255	IGR	shelf	NA	-0.1245	2.93e-06	0.000568351
cg06684088	IGR	shore	NA	-0.12448	0.000400708	0.00615571
cg04592811	Body	opensea	PIGL	-0.124472	4.12e-05	0.00164934
cg23193059	IGR	shore	NA	-0.124429	1.9e-05	0.00114781
cg09010699	IGR	opensea	NA	-0.124409	4.58e-05	0.00173522
cg25757820	IGR	shelf	NA	-0.124404	0.000153205	0.00336902
cg01477971	Body	opensea	TMEM182	-0.124346	0.000318469	0.00530696
cg18659081	Body	opensea	PARVG	-0.12433	6.56e-05	0.0020885
cg21995068	TSS1500	shore	LOC100134868	-0.124281	9.36e-05	0.00253376
cg26184474	Body	opensea	KIF2A	-0.124234	4.8e-05	0.00177407
cg24012880	5'UTR	opensea	TSPAN18	-0.124211	1.78e-05	0.00111369
cg02052762	Body	opensea	ANKFY1	-0.124205	8.52e-05	0.00240174
cg00278392	IGR	opensea	NA	-0.124199	0.000103398	0.00267863
cg19699682	IGR	opensea	NA	-0.124162	0.000188021	0.00381807
cg24595580	TSS1500	shore	FLJ42289	-0.124152	1.14e-05	0.000925387
cg07599389	5'UTR	opensea	CDYL	-0.124142	3.03e-06	0.000575678
cg12578536	IGR	shelf	NA	-0.12412	1.72e-05	0.00109874
cg11327657	Body	shore	C21orf70	-0.124112	3.22e-06	0.000589189
cg25949447	IGR	shelf	NA	-0.12411	1.14e-05	0.000926545
cg03249630	TSS200	opensea	ANKRD22	-0.124029	0.000509332	0.00722305
cg06001524	Body	opensea	STX8	-0.123998	7.15e-05	0.00218313
cg17344091	Body	opensea	TRIM27	-0.123946	0.000119841	0.00291668
cg15044453	Body	opensea	MTHFD1L	-0.123944	3.21e-05	0.00146341
cg04737991	Body	opensea	CHST11	-0.123935	2.03e-05	0.00118643
cg14115756	TSS1500	opensea	GPR21	-0.123921	4.06e-05	0.00163757
cg18568335	Body	shelf	PACS2	-0.12392	3.11e-05	0.00144304
cg21697512	Body	shelf	CD34	-0.123911	2.36e-06	0.00052235
cg25031824	Body	opensea	P2RX1	-0.123844	2.6e-05	0.00131966
cg13084677	Body	shore	LOC401127	-0.123835	3.61e-05	0.00154611
cg11169848	Body	shore	LOC100130987	-0.123833	1.5e-06	0.000451534
cg01441127	Body	opensea	MR1	-0.123821	8.96e-05	0.00247186
cg01620164	Body	shelf	FIGN	-0.123816	0.00421101	0.0314824
cg23079808	TSS1500	island	LTBR	-0.123789	4.3e-06	0.000639649
cg16899991	IGR	shelf	NA	-0.123781	2.94e-05	0.00140366
cg19447962	5'UTR	shore	RAI1	-0.123777	8.22e-07	0.000382854
cg23029655	Body	island	ITGB7	-0.123751	3.37e-07	0.000320396
cg06740950	Body	opensea	FNDC3B	-0.123749	7.51e-05	0.00224575
cg11922563	IGR	shelf	NA	-0.123748	9.69e-05	0.00258188
cg06937882	TSS1500	shore	C20orf3	-0.123739	0.000185174	0.00378359
cg11173131	TSS200	opensea	C20orf123	-0.123699	7.96e-06	0.000802044
cg07118376	Body	shore	ASPH	-0.123696	1.06e-05	0.000898631
cg27627524	Body	opensea	ASAP1	-0.123671	6.28e-05	0.00203854
cg01700462	TSS200	opensea	C20orf123	-0.123641	5.46e-05	0.00189602
cg20168849	Body	opensea	TPRG1	-0.123637	3.48e-05	0.00152009
cg01232717	Body	opensea	TCEB1	-0.123602	0.000512034	0.007247
cg00483030	Body	shore	CBX4	-0.123595	3.68e-06	0.000609423
cg16283183	3'UTR	opensea	LIMD1	-0.123551	1.68e-05	0.00108786
cg10765922	Body	island	HLA-DRB1	-0.123549	0.00288291	0.0240545
cg20430631	IGR	opensea	NA	-0.123519	0.000103351	0.00267808
cg15545247	1stExon	opensea	GPR109B	-0.123502	0.000185344	0.003785
cg03305017	IGR	shelf	NA	-0.1235	4.88e-05	0.00179011
cg14012546	Body	opensea	INPP5D	-0.123496	0.000467028	0.00682707
cg19429405	TSS200	opensea	C10orf105	-0.123488	0.000150577	0.0033328
cg09322555	Body	shelf	PSMB9	-0.12343	1.74e-05	0.00110414
cg03926751	5'UTR	shore	KLHL8	-0.123379	3.26e-05	0.00147153
cg23924737	TSS1500	shore	MRPS23	-0.123349	1.06e-06	0.000408418
cg26514961	Body	opensea	PLXNC1	-0.123308	0.000153649	0.00337319
cg08044454	5'UTR	opensea	ELMO1	-0.123307	2.04e-05	0.00118743
cg17316649	Body	island	HLA-DRB1	-0.123307	0.0033726	0.0268912
cg12183501	Body	opensea	HPS3	-0.12329	8.84e-05	0.00245339
cg22534097	TSS200	opensea	ANKRD1	-0.123279	0.000122851	0.00296041
cg12192749	IGR	opensea	NA	-0.123253	6.77e-05	0.00212712
cg03892838	TSS1500	shore	LRRFIP1	-0.123233	1.74e-07	0.000291469
cg24941342	IGR	opensea	NA	-0.12313	0.000107681	0.00273956
cg18571045	Body	shelf	TUBGCP3	-0.123122	2.57e-05	0.00131376
cg05581469	3'UTR	shore	MLL2	-0.123054	4.16e-06	0.000632142
cg07658508	3'UTR	opensea	SLC26A1	-0.123022	8.87e-05	0.00245774
cg09284275	Body	opensea	MYH11	-0.123017	2.32e-05	0.00126191
cg20609803	TSS1500	opensea	FCER1G	-0.123009	8.32e-05	0.00237104
cg16567676	TSS200	opensea	HPGDS	-0.122971	0.000119493	0.00291017
cg10313337	Body	opensea	CDH1	-0.122961	6.81e-05	0.00213306
cg01040749	Body	opensea	INPP5A	-0.122941	0.000132129	0.00308842
cg01183510	TSS1500	shore	IRAK3	-0.122907	1.96e-05	0.00116853
cg16713889	Body	opensea	FAM161B	-0.122894	0.000310819	0.0052276
cg04231677	Body	opensea	FAM129A	-0.122886	2.2e-05	0.00123026
cg02241759	Body	shore	NR1I2	-0.122885	1.76e-05	0.00110901
cg19069360	Body	opensea	CACNA2D4	-0.12282	0.000259807	0.00466758
cg11411220	Body	shelf	CCNY	-0.122806	4.87e-06	0.000671888
cg24686551	IGR	opensea	NA	-0.122778	7.81e-05	0.00229207
cg01584932	TSS1500	shore	TTC31	-0.122776	6.13e-05	0.0020133
cg04266202	Body	shelf	MPO	-0.122761	1.59e-05	0.00106185
cg17329648	Body	shore	SFXN5	-0.122717	3.74e-06	0.000612481
cg18503912	5'UTR	shelf	FXYD1	-0.12269	3.98e-06	0.000622627
cg24079727	Body	opensea	TCF12	-0.122678	5.84e-05	0.00196599
cg04118119	TSS1500	shore	ESD	-0.122633	4.58e-05	0.00173522
cg07586235	IGR	opensea	NA	-0.122626	0.000232545	0.00434789
cg17404534	Body	opensea	DAGLB	-0.122598	6.15e-05	0.00201646
cg18332229	Body	shelf	ADAP1	-0.122516	1.26e-05	0.000963528
cg02853355	3'UTR	opensea	FAM92B	-0.12251	3.41e-06	0.000597396
cg00901982	IGR	opensea	NA	-0.1225	5.79e-05	0.00195636
cg16778107	Body	opensea	AXIN1	-0.122484	2.38e-05	0.001274
cg13345558	Body	shore	PRKAA1	-0.122477	1.09e-05	0.000909412
cg27369423	TSS1500	shelf	DKFZP434H168	-0.122459	1.21e-06	0.000425734
cg10471743	IGR	shore	NA	-0.12243	8e-06	0.000803154
cg03221483	5'UTR	opensea	2016-09-09	-0.122366	0.000106179	0.00271859
cg14220170	Body	opensea	TRANK1	-0.122335	2.99e-05	0.00141668
cg11266682	Body	island	SLC2A9	-0.122335	0.000437486	0.00653709
cg25397054	Body	opensea	GNA12	-0.122311	1.94e-06	0.000488656
cg14468692	5'UTR	shore	RNH1	-0.122268	5.26e-06	0.000695936
cg02392124	Body	opensea	WAC	-0.122263	6.34e-05	0.00204871
cg01155092	TSS1500	opensea	TMEM100	-0.12224	8.83e-05	0.0024525
cg13831136	IGR	shore	NA	-0.122233	2.11e-05	0.00120454
cg19869035	3'UTR	opensea	IQCE	-0.122184	4.02e-05	0.00163212
cg02856190	1stExon	shelf	FUT4	-0.122158	0.000239659	0.00443293
cg04843813	TSS1500	shore	FNDC3B	-0.122128	1.33e-05	0.000983061
cg06059360	Body	opensea	NKTR	-0.122126	0.000131736	0.00308353
cg22033476	Body	opensea	THADA	-0.122095	0.000353954	0.00568946
cg11919271	Body	opensea	MED12L	-0.122084	2.09e-05	0.00119986
cg14272075	TSS1500	shore	RNF126P1	-0.122059	4.53e-05	0.00172629
cg04397884	Body	opensea	PELI2	-0.122026	3.32e-05	0.00148292
cg02206980	TSS1500	shore	SIRT5	-0.122018	0.000100622	0.00263456
cg06070324	Body	opensea	PPCDC	-0.121993	6.77e-06	0.000750721
cg03363565	TSS1500	shore	RAB11FIP3	-0.12199	1.51e-05	0.00103551
cg22528270	5'UTR	opensea	PRKAG2	-0.121916	1.3e-05	0.00097663
cg25505880	TSS1500	shore	NXF1	-0.121889	1.87e-05	0.00114205
cg01827633	Body	opensea	TTLL4	-0.121887	6.22e-05	0.00202982
cg15649236	TSS200	shore	MIR10A	-0.121871	5.14e-07	0.000335798
cg02018337	Body	opensea	GAS7	-0.121841	6.28e-06	0.000732761
cg03156546	Body	opensea	TNRC6A	-0.121839	0.000236963	0.00440302
cg18351781	Body	island	UHRF1	-0.121815	8.96e-05	0.00247186
cg14746387	IGR	opensea	NA	-0.12173	2.61e-05	0.00132228
cg10751070	IGR	opensea	NA	-0.121716	0.000153986	0.00337744
cg07834069	Body	opensea	CD300LB	-0.121698	0.000191763	0.00386174
cg08688659	Body	opensea	CD44	-0.121696	0.000153762	0.00337454
cg02111865	5'UTR	shore	YPEL5	-0.121651	0.000373767	0.00588983
cg01357222	IGR	opensea	NA	-0.121609	3.11e-05	0.00144439
cg18463686	5'UTR	opensea	CLEC5A	-0.121597	0.000222015	0.00422686
cg27609217	IGR	shore	NA	-0.121593	7.25e-05	0.00220027
cg26639076	3'UTR	opensea	RIF1	-0.121582	0.000113096	0.00281932
cg13172359	Body	shore	IFIT5	-0.121569	0.00226095	0.0202515
cg16256243	IGR	shelf	NA	-0.12147	7.26e-06	0.000770527
cg00859441	Body	shelf	PLBD2	-0.121433	0.000158794	0.0034424
cg15235987	Body	opensea	EP400	-0.121417	0.000226068	0.00427332
cg15037823	3'UTR	opensea	EIF4E3	-0.121414	2.56e-05	0.00131025
cg12475879	IGR	shelf	NA	-0.121396	0.000242456	0.00446366
cg02584498	TSS200	opensea	GREB1	-0.121368	6.59e-05	0.0020944
cg05060607	Body	opensea	C3AR1	-0.121298	0.000302464	0.00513881
cg02889774	Body	opensea	XPO7	-0.121261	1.72e-05	0.00109803
cg13935558	TSS1500	shore	TRIM24	-0.121232	1.91e-06	0.000487535
cg27510066	Body	opensea	CSGALNACT1	-0.121214	0.000396668	0.00611779
cg14547461	Body	shelf	KIAA0146	-0.121182	5.02e-05	0.00181672
cg23528247	Body	opensea	C3orf26	-0.121171	0.000174561	0.00364352
cg23671196	5'UTR	opensea	ATP8B4	-0.121147	1.47e-05	0.00102642
cg10296205	5'UTR	opensea	SYTL3	-0.121125	3.66e-05	0.00155465
cg25773585	TSS200	opensea	SNORA30	-0.121115	0.000116468	0.00286797
cg10953410	Body	opensea	HTR3A	-0.121104	0.000299357	0.00510497
cg26105956	Body	shelf	SHE	-0.121096	0.000337623	0.00551012
cg24323958	Body	shore	SLC25A24	-0.121085	4.92e-06	0.000674839
cg26877678	5'UTR	opensea	KSR1	-0.12107	0.000188479	0.00382343
cg08905487	TSS200	opensea	LAIR2	-0.121009	0.0001078	0.00274141
cg01241390	Body	shore	RNU5E	-0.120984	9.38e-05	0.00253768
cg05206633	Body	opensea	COL23A1	-0.12098	0.000131816	0.00308443
cg21696012	Body	shelf	HMGCL	-0.120956	4.18e-05	0.00166215
cg14419046	IGR	opensea	NA	-0.120931	3.52e-05	0.00152665
cg08243626	IGR	opensea	NA	-0.120931	0.00022231	0.00422969
cg24484138	5'UTR	island	C20orf112	-0.120917	2.85e-05	0.00138367
cg25390440	TSS1500	shore	GYPC	-0.12086	7.89e-06	0.000798447
cg15527515	Body	opensea	SLC7A8	-0.120858	6.93e-05	0.00215024
cg25153741	Body	opensea	COL23A1	-0.120836	3.4e-05	0.00150328
cg02573357	Body	opensea	LAX1	-0.120811	3.26e-05	0.00147247
cg11389756	Body	opensea	TRIM27	-0.120778	0.000514035	0.00726491
cg17766305	Body	opensea	RNLS	-0.120773	9.68e-06	0.00086453
cg09416908	TSS1500	shore	ME3	-0.120758	0.000116633	0.00286996
cg25145679	IGR	shelf	NA	-0.120718	2.41e-05	0.00127962
cg06502279	TSS1500	shore	RAB11FIP3	-0.120683	8.41e-05	0.00238145
cg03381237	Body	opensea	RBM33	-0.120664	2.32e-07	0.000298618
cg09303642	TSS1500	opensea	NFE2	-0.120649	8.77e-05	0.00244328
cg09342997	Body	opensea	NRF1	-0.120641	0.000824904	0.00995539
cg12339328	Body	shelf	SEC23B	-0.120626	1.17e-05	0.00093554
cg16162970	TSS1500	shore	PACS2	-0.1206	3.88e-07	0.000326814
cg03636880	Body	island	HLA-DPB1	-0.120598	0.00412984	0.0310503
cg18065599	IGR	opensea	NA	-0.120596	1.52e-05	0.0010399
cg23012600	IGR	opensea	NA	-0.120563	5.57e-05	0.00191664
cg19356022	5'UTR	shelf	SHC1	-0.120561	4.46e-05	0.00171213
cg00444740	TSS200	opensea	MIR1208	-0.120543	0.000227076	0.00428398
cg05279761	Body	opensea	ACAD11	-0.120522	6.35e-05	0.00205032
cg15015109	Body	opensea	HELZ	-0.120521	1.18e-05	0.000937997
cg04364261	IGR	shore	NA	-0.12048	3.45e-06	0.000599349
cg18446110	Body	shore	SLC23A1	-0.120479	1.74e-05	0.00110283
cg13679804	IGR	opensea	NA	-0.12047	2.93e-05	0.00140183
cg18128914	3'UTR	opensea	LOXL1	-0.120374	0.00111521	0.0122606
cg00760203	Body	opensea	PLXDC1	-0.120373	1.51e-06	0.000451534
cg14180511	TSS1500	opensea	IL10	-0.120363	1.28e-06	0.000434184
cg14268557	Body	opensea	TRIM27	-0.120352	0.000876453	0.0103817
cg01351315	TSS200	shore	LOC404266	-0.12035	6.87e-05	0.00213971
cg23254569	Body	shelf	TEAD3	-0.120341	2.21e-05	0.0012312
cg12415479	Body	opensea	PLXND1	-0.12032	2.39e-07	0.000298618
cg00066854	IGR	opensea	NA	-0.120315	2.14e-05	0.00121022
cg19320820	Body	opensea	AFF1	-0.120311	2.66e-05	0.00133394
cg10287970	5'UTR	opensea	RREB1	-0.120287	2.25e-05	0.00124087
cg08550523	IGR	opensea	NA	-0.120286	1.35e-05	0.000988219
cg17734802	TSS1500	shelf	DIO1	-0.120256	0.00036671	0.00581702
cg19053046	Body	shore	HLA-DPB1	-0.120221	0.00377502	0.029143
cg04238983	TSS1500	opensea	MIR612	-0.120212	3.48e-06	0.00060106
cg02012974	Body	opensea	LRIG1	-0.12016	5.15e-05	0.00184035
cg12708994	TSS1500	shore	DSE	-0.120152	3.77e-05	0.00157869
cg23338668	IGR	opensea	NA	-0.120145	0.000217115	0.00416779
cg06100973	TSS200	shore	ELANE	-0.120133	7.51e-05	0.00224674
cg14520947	IGR	opensea	NA	-0.120089	0.000145354	0.00326665
cg04598292	5'UTR	shore	NCAPG2	-0.120087	1.09e-06	0.00041402
cg07917901	IGR	shelf	NA	-0.120083	7.72e-05	0.00228033
cg09455881	IGR	opensea	NA	-0.120063	1.16e-05	0.00093156
cg08930843	5'UTR	opensea	ZNF438	-0.120013	2.44e-05	0.00128377

## Sheet: hypomethylated_genes
Supplemental Table 3-2. Methylation genes significantly hypomethylated in SSc vs Normal
Infinium Probe Name	Gene name	deltaBeta	P.Value	BH.P.value
cg23334433	AATK	-0.140889	5.98e-05	0.00199019
cg07375836	ACACA	-0.130554	2.55e-05	0.00130985
cg05279761	ACAD11	-0.120522	6.35e-05	0.00205032
cg23169883	ADAMTS14	-0.133247	2.65e-05	0.00133224
cg18332229	ADAP1	-0.122516	1.26e-05	0.000963528
cg01924292	ADIPOR2	-0.139997	2.09e-05	0.00119861
cg10376161	ADORA3	-0.125788	9.99e-06	0.000876235
cg23210971	AFF1	-0.136286	6.9e-05	0.00214512
cg22169990	AGAP3	-0.130549	2.09e-05	0.00119916
cg20518446	AHNAK	-0.124598	7.68e-07	0.000373645
cg13999433	AKNA	-0.139636	1.42e-05	0.0010114
cg20090290	AMBRA1	-0.155952	5.35e-06	0.000699257
cg20047349	ANKFN1	-0.124579	0.00256679	0.0221449		Ankyrin Repeat And Fibronectin Type III Domain Containing 1
cg02052762	ANKFY1	-0.124205	8.52e-05	0.00240174		Ankyrin Repeat And FYVE Domain Containing 1
cg22534097	ANKRD1	-0.123279	0.000122851	0.00296041		Ankyrin Repeat Domain 1
cg24065504	ANKRD22	-0.130108	1.25e-05	0.000959371		Ankyrin Repeat Domain 22
cg04525852	ANKRD50	-0.131533	1.42e-05	0.00101021		Ankyrin Repeat Domain 50
cg16422316	AP1G1	-0.139162	1.19e-05	0.000942902
cg14414154	APP	-0.132443	0.00016742	0.00355542
cg14575356	ARHGAP18	-0.133636	4.1e-05	0.00164445		Rho GTPase Activating Protein 18
cg19351604	ARHGEF10	-0.13279	2.36e-05	0.00126961		Rho Guanine Nucleotide Exchange Factor 10
cg17164954	ARID1B	-0.125574	3e-05	0.00141868
cg27627524	ASAP1	-0.123671	6.28e-05	0.00203854
cg07118376	ASPH	-0.123696	1.06e-05	0.000898631
cg02607972	ASXL2	-0.130655	1.71e-05	0.00109689
cg03998264	ATF7	-0.128336	7.55e-05	0.00225173
cg23671196	ATP8B4	-0.121147	1.47e-05	0.00102642
cg07275179	ATXN7	-0.163626	4.08e-05	0.00164013
cg06317209	AVIL	-0.125506	5.15e-05	0.00183975
cg16778107	AXIN1	-0.122484	2.38e-05	0.001274
cg22076474	BACH1	-0.127341	0.000230168	0.00432091
cg15285436	BCAS3	-0.138089	7.39e-05	0.00222553
cg08131309	BMF	-0.124616	3.91e-05	0.00160975
cg26381210	BMPR1A	-0.131958	2.05e-05	0.00118939
cg20078972	BRD4	-0.129261	4.81e-05	0.00177537
cg05057534	BRE	-0.124917	1.14e-05	0.000926545
cg17525495	BZRAP1	-0.125185	1.3e-05	0.00097663
cg19429405	C10orf105	-0.123488	0.000150577	0.0033328
cg00899659	C10orf25	-0.13386	1.19e-06	0.000424808
cg15818008	C11orf34	-0.138968	9.84e-06	0.00087066
cg10611016	C11orf42	-0.126257	8.81e-05	0.00244903
cg05580141	C12orf41	-0.125279	0.000108815	0.00275644
cg07481273	C14orf109	-0.134306	1.44e-05	0.00101686
cg25576997	C14orf34	-0.153445	3.52e-05	0.00152718
cg27664407	C16orf89	-0.133235	1e-05	0.000879643
cg02067584	C17orf59	-0.136243	0.000132385	0.00309119
cg27573991	C1orf150	-0.152659	0.00457791	0.0334366
cg24484138	C20orf112	-0.120917	2.85e-05	0.00138367
cg11173131	C20orf123	-0.123699	7.96e-06	0.000802044
cg10357682	C20orf27	-0.12768	5.05e-05	0.00182299
cg20661985	C20orf3	-0.128188	0.000104515	0.00269527
cg11327657	C21orf70	-0.124112	3.22e-06	0.000589189
cg05249836	C22orf9	-0.126884	0.000306621	0.00518389
cg11908131	C2orf40	-0.150732	3.16e-05	0.00145318
cg05060607	C3AR1	-0.121298	0.000302464	0.00513881
cg14454680	C3orf26	-0.1299	8.49e-05	0.00239653
cg22491058	C4BPA	-0.125464	8.49e-05	0.0023967
cg23137881	C4orf45	-0.144552	0.000153995	0.00337748
cg20780105	C5orf43	-0.153377	1.47e-05	0.00102602
cg19635401	C6orf204	-0.147161	5.09e-05	0.0018302
cg23302989	C7orf31	-0.129636	0.000109814	0.00276992
cg05000446	C9orf131	-0.14717	2.16e-05	0.00121789
cg12049550	CACHD1	-0.135313	4.58e-05	0.00173477		Cache Domain Containing 1
cg21188533	CACNA1D	-0.136071	0.00138387	0.0142692		Calcium Voltage-Gated Channel Subunit Alpha1 D
cg19069360	CACNA2D4	-0.12282	0.000259807	0.00466758		Calcium Voltage-Gated Channel Auxiliary Subunit Alpha2delta 4
cg02227879	CAMK2G	-0.142833	5.16e-05	0.00184101		Calcium/Calmodulin Dependent Protein Kinase II Gamma
cg17541002	CAMKK2	-0.141259	5.66e-05	0.00193168		Calcium/Calmodulin Dependent Protein Kinase Kinase 2
cg03797115	CASP6	-0.143534	1.49e-05	0.0010316		Caspase 6
cg14985891	CASQ2	-0.145333	0.00010589	0.00271418		Calsequestrin 2
cg06465076	CAST	-0.132768	0.000157596	0.00342705
cg07211972	CBS	-0.130703	0.000159966	0.00345576
cg00483030	CBX4	-0.123595	3.68e-06	0.000609423
cg24475517	CCDC93	-0.12459	0.000631521	0.00833536
cg11411220	CCNY	-0.122806	4.87e-06	0.000671888
cg07834069	CD300LB	-0.121698	0.000191763	0.00386174
cg09643312	CD302	-0.126263	7.86e-06	0.000797217
cg21697512	CD34	-0.123911	2.36e-06	0.00052235
cg08688659	CD44	-0.121696	0.000153762	0.00337454
cg15382933	CD59	-0.136934	8.68e-06	0.000828833
cg01925950	CDC16	-0.131016	3.42e-06	0.000597953
cg10313337	CDH1	-0.122961	6.81e-05	0.00213306
cg08300570	CDK6	-0.142331	5.49e-05	0.00190146
cg27307183	CDYL	-0.149042	5.52e-06	0.000703921
cg21492378	CEP110	-0.140989	5.7e-05	0.00194015
cg00514723	CHD6	-0.1285	2.46e-07	0.000300478		Chromodomain Helicase DNA Binding Protein 6
cg12774429	CHD8	-0.127214	2.32e-06	0.000515788		Chromodomain Helicase DNA Binding Protein 8
cg05768044	CHD9	-0.124977	1.85e-05	0.00113717		Chromodomain Helicase DNA Binding Protein 9
cg04737991	CHST11	-0.123935	2.03e-05	0.00118643
cg05971678	CHST15	-0.129067	3.25e-05	0.0014689
cg12401842	CLEC4A	-0.132131	7.44e-05	0.0022344
cg18463686	CLEC5A	-0.121597	0.000222015	0.00422686
cg01028142	CMPK2	-0.168022	3.55e-05	0.0015334
cg05206633	COL23A1	-0.12098	0.000131816	0.00308443
cg04089901	COL28A1	-0.124762	1.82e-05	0.00112852
cg08036492	COX10	-0.135465	1.36e-05	0.000990721
cg18634760	CPB2	-0.12899	7.29e-05	0.00220839
cg12162100	CPNE3	-0.127001	0.000385874	0.0060102
cg10752508	CPOX	-0.139789	7.91e-06	0.000799695
cg09271097	CREB3L2	-0.13466	4.64e-05	0.0017472
cg26709988	CRISPLD2	-0.127491	6.52e-06	0.000741436
cg16268734	CS	-0.124604	0.000250277	0.00456023
cg27510066	CSGALNACT1	-0.121214	0.000396668	0.00611779
cg07896832	CSPP1	-0.126782	6.03e-06	0.000726896
cg26928972	CSTA	-0.132272	0.000167835	0.0035599
cg24743156	CTAGE5	-0.13584	4.62e-05	0.00174337
cg19210276	CTNND1	-0.129998	2.16e-05	0.00121662
cg24777950	CTSG	-0.12764	8.3e-05	0.00236874
cg08545593	CTSZ	-0.129717	1.13e-05	0.000921962
cg07125981	CUL2	-0.135975	2.66e-05	0.00133394
cg23445003	CUX1	-0.138443	7.84e-05	0.0022954
cg15228694	CYB5R2	-0.125924	1.36e-05	0.000991723
cg17404534	DAGLB	-0.122598	6.15e-05	0.00201646
cg20242427	DAK	-0.134333	3.5e-05	0.00152453
cg17013990	DEDD	-0.127647	8.8e-05	0.00244694
cg18167921	DEPDC1	-0.126229	1.03e-06	0.000402765
cg22381196	DHODH	-0.12492	8.18e-05	0.00234983
cg17734802	DIO1	-0.120256	0.00036671	0.00581702
cg19055828	DIP2B	-0.131579	0.0004761	0.00690847
cg27369423	DKFZP434H168	-0.122459	1.21e-06	0.000425734
cg17591816	DNM3	-0.149242	6.15e-07	0.000348591
cg04730794	DOCK2	-0.133558	7.74e-05	0.00228314
cg04205769	DPH5	-0.151981	3.51e-05	0.00152558
cg10789956	DPYSL2	-0.134875	1.23e-05	0.000954063
cg07472373	DRGX	-0.142416	5.59e-05	0.00191886
cg12708994	DSE	-0.120152	3.77e-05	0.00157869
cg06311422	DST	-0.128153	8.26e-06	0.00081159
cg17889831	DSTYK	-0.131631	4.54e-06	0.000653491
cg27365701	DUSP6	-0.136045	4.95e-06	0.000676912
cg08628635	E2F3	-0.131962	9.59e-05	0.00256822
cg24553417	EBPL	-0.126019	7.09e-05	0.00217319
cg10028625	ECT2	-0.157983	3.35e-05	0.00149129
cg25448856	EEA1	-0.135934	0.000105816	0.00271278
cg02098075	EFCAB1	-0.126234	6.46e-05	0.00206954
cg15142192	EIF2C3	-0.13447	0.000111641	0.00279943
cg15037823	EIF4E3	-0.121414	2.56e-05	0.00131025
cg08539965	EIF4G3	-0.136785	4.12e-05	0.00164952
cg06100973	ELANE	-0.120133	7.51e-05	0.00224674
cg16998950	ELL2	-0.146975	5.91e-05	0.00197715
cg05642546	ELMO1	-0.138984	3.93e-06	0.00061868
cg18390025	ELOVL3	-0.124807	4.09e-06	0.000629153
cg05025071	EMR1	-0.134638	0.000130088	0.00306009
cg08126118	ENOX1	-0.139003	1.86e-05	0.00113825
cg15235987	EP400	-0.121417	0.000226068	0.00427332
cg25941751	EPAS1	-0.125887	6.22e-05	0.00202881
cg21648069	ERC1	-0.142734	5.18e-05	0.001845
cg06373940	ERCC3	-0.150283	3.63e-05	0.00154808
cg20165746	ERI1	-0.124995	1.14e-05	0.000925028
cg26746309	ERLIN1	-0.125545	2.13e-05	0.00120927
cg17463083	ERN1	-0.131391	1.7e-05	0.00109438
cg04118119	ESD	-0.122633	4.58e-05	0.00173522
cg21141827	ETF1	-0.14016	4.54e-05	0.00172649
cg10456459	ETNK1	-0.155247	2.93e-05	0.00140149
cg00168694	ETS2	-0.136679	3.84e-05	0.001595
cg05783185	EXT1	-0.124554	2.92e-05	0.00139962
cg02677635	FAM125B	-0.134908	2.73e-05	0.00135295
cg04231677	FAM129A	-0.122886	2.2e-05	0.00123026
cg07302959	FAM133B	-0.146659	1.63e-05	0.00107402
cg16713889	FAM161B	-0.122894	0.000310819	0.0052276
cg23054181	FAM169B	-0.129061	6.17e-05	0.0020198
cg07212327	FAM49B	-0.141053	0.000127698	0.00302518
cg02853355	FAM92B	-0.12251	3.41e-06	0.000597396
cg05252264	FCAR	-0.137473	3.29e-05	0.00147672
cg20609803	FCER1G	-0.123009	8.32e-05	0.00237104
cg24496021	FCHSD2	-0.150001	8.57e-05	0.00241161
cg20312012	FER1L5	-0.146148	6.34e-05	0.00204862
cg22957691	FEZ2	-0.154156	6.98e-05	0.00215699
cg23670353	FGGY	-0.145815	6.24e-06	0.00073074
cg01620164	FIGN	-0.123816	0.00421101	0.0314824
cg03546163	FKBP5	-0.144056	5.85e-05	0.00196874
cg02579959	FLJ42289	-0.126052	0.000188624	0.00382494
cg20227511	FLT3	-0.13304	3.25e-05	0.00147106
cg14016236	FNDC3B	-0.137552	2.9e-05	0.00139426
cg25344401	FOXK1	-0.170406	2.19e-05	0.00122646
cg06719445	FOXN3	-0.14689	4.39e-05	0.00170133
cg08792630	FOXO3	-0.131703	1.05e-05	0.000896544
cg02520804	FOXP1	-0.163701	1.17e-05	0.000936165
cg00188748	FPGS	-0.143563	2.41e-07	0.000298618
cg22152446	FRYL	-0.124844	3.86e-05	0.00159943
cg00625110	FTO	-0.151477	1.43e-06	0.000445609
cg02856190	FUT4	-0.122158	0.000239659	0.00443293
cg18503912	FXYD1	-0.12269	3.98e-06	0.000622627
cg13703437	FYB	-0.139089	3.98e-06	0.000622797
cg27123392	GABPB1	-0.129556	6.68e-05	0.00211047
cg21574244	GANC	-0.131842	4.48e-05	0.00171623
cg00842918	GAS7	-0.144579	7.58e-05	0.00225737
cg26942829	GFOD1	-0.131952	0.000134592	0.00312225
cg04452195	GJB2	-0.14265	7.23e-05	0.0021969
cg03568673	GJB6	-0.13499	4.07e-05	0.00163787
cg09571972	GMDS	-0.151335	1.33e-06	0.000438694
cg20001791	GMPR	-0.128	2.01e-05	0.00118224
cg25397054	GNA12	-0.122311	1.94e-06	0.000488656
cg27019717	GNG2	-0.132199	7.82e-05	0.00229388
cg04603130	GNG7	-0.148877	1.2e-05	0.000944419
cg22713444	GNRHR2	-0.133818	5.95e-05	0.00198413
cg16824282	GP9	-0.125978	3.99e-05	0.00162504
cg09290120	GPD2	-0.140982	2.42e-07	0.000300151
cg15545247	GPR109B	-0.123502	0.000185344	0.003785
cg14115756	GPR21	-0.123921	4.06e-05	0.00163757
cg02584498	GREB1	-0.121368	6.59e-05	0.0020944
cg08399444	GSG1	-0.124869	4.5e-05	0.00172154
cg24493367	GSTCD	-0.132245	3.2e-05	0.00146111
cg25390440	GYPC	-0.12086	7.89e-06	0.000798447
cg22077197	HDAC4	-0.125072	4.8e-06	0.000665643
cg01088404	HDAC7	-0.12787	5.58e-06	0.00070718
cg15015109	HELZ	-0.120521	1.18e-05	0.000937997
cg14703454	HHLA2	-0.146291	3e-05	0.00141721
cg16672562	HIF3A	-0.125842	0.000122649	0.00295848
cg04225088	HIPK3	-0.152057	1.08e-05	0.000902227
cg01374870	HLA-DMB	-0.125956	4.86e-05	0.00178613
cg19990651	HLA-DPB1	-0.167387	0.000153378	0.00337057
cg10632894	HLA-DRB1	-0.216721	0.00248731	0.0216484
cg21696012	HMGCL	-0.120956	4.18e-05	0.00166215
cg16567676	HPGDS	-0.122971	0.000119493	0.00291017
cg12183501	HPS3	-0.12329	8.84e-05	0.00245339
cg07283015	HRH4	-0.146776	2.54e-05	0.00130728
cg01586609	HTR3A	-0.144504	1.39e-05	0.00100332		5-Hydroxytryptamine Receptor 3A
cg21184369	HTRA4	-0.135754	0.000103409	0.00267867
cg27176729	IER5	-0.131817	0.000112121	0.00280579
cg13298466	IFFO1	-0.128426	0.000105	0.00270232			Intermediate Filament Family Orphan 1
cg01079652	IFI44	-0.145546	0.000115053	0.0028493		Interferon Induced Protein 44
cg05696877	IFI44L	-0.265561	3.14e-05	0.0014503		Interferon Induced Protein 44 Like
cg05552874	IFIT1	-0.2159	2.18e-05	0.00122462		Interferon Induced Protein With Tetratricopeptide Repeats 1
cg13172359	IFIT5	-0.121569	0.00226095	0.0202515		Interferon Induced Protein With Tetratricopeptide Repeats 5
cg17356733	IFNGR2	-0.134325	7.69e-05	0.00227527
cg17744604	IL10	-0.126711	3.16e-06	0.000586861
cg17142183	IL1R2	-0.142981	2.86e-05	0.00138411
cg02656594	IL21R	-0.133606	8.63e-06	0.000827582
cg07363330	IL31RA	-0.127764	4.78e-05	0.00177105
cg12517576	IMPDH1	-0.12535	7.94e-06	0.00080062
cg09163720	INPP5A	-0.126261	1.08e-05	0.000903341		Inositol Polyphosphate-5-Phosphatase A
cg14012546	INPP5D	-0.123496	0.000467028	0.00682707		Inositol Polyphosphate-5-Phosphatase D
cg19869035	IQCE	-0.122184	4.02e-05	0.00163212
cg12866960	IRAK3	-0.136434	0.000235988	0.00439148
cg20765716	ITGAE	-0.128007	1.35e-06	0.000439657		Integrin Subunit Alpha E
cg23029655	ITGB7	-0.123751	3.37e-07	0.000320396		Integrin Subunit Beta 7
cg02105211	ITPR1	-0.137262	4.18e-05	0.00166114
cg16452651	ITSN1	-0.13936	2.88e-05	0.00138997
cg20704555	JAZF1	-0.138077	5.97e-05	0.00198831
cg26605164	KAZALD1	-0.125935	7.31e-06	0.000771476
cg05255811	KCNK5	-0.131781	2.88e-05	0.00138997
cg25199552	KDM1A	-0.140419	7.97e-06	0.000802052		Lysine Demethylase 1A
cg10958452	KDM4A	-0.13587	4.45e-05	0.00171051		Lysine Demethylase 4A
cg03714676	KIAA0146	-0.142997	4.39e-06	0.000645271		Scaffolding Protein Involved In DNA Repair
cg16506970	KIAA0232	-0.158141	0.000107542	0.0027378
cg15935770	KIAA0247	-0.141352	2.13e-05	0.00120852		Sushi Domain Containing 6
cg16396191	KIAA0564	-0.133616	0.000156336	0.00340934		Von Willebrand Factor A Domain Containing 8
cg02830749	KIAA0922	-0.127651	3.55e-05	0.00153378
cg19092837	KIF1B	-0.125328	5.55e-05	0.00191435		Kinesin Family Member 1B
cg26184474	KIF2A	-0.124234	4.8e-05	0.00177407		Kinesin Family Member 2A
cg04747180	KLHL5	-0.134061	2.47e-05	0.00129357
cg03926751	KLHL8	-0.123379	3.26e-05	0.00147153
cg12249234	KSR1	-0.134342	1.73e-05	0.00110088
cg21892720	LAIR1	-0.126131	1.16e-05	0.000932911
cg08905487	LAIR2	-0.121009	0.0001078	0.00274141
cg10447327	LANCL1	-0.151837	6.59e-06	0.00074353
cg24168002	LASS6	-0.151803	1.08e-05	0.000903002
cg02573357	LAX1	-0.120811	3.26e-05	0.00147247
cg20008101	LGALS3	-0.139683	2.83e-05	0.00137611
cg25437886	LIMD1	-0.150748	3.69e-05	0.00156139
cg02182476	LOC100128573	-0.151975	2.74e-05	0.0013563
cg11169848	LOC100130987	-0.123833	1.5e-06	0.000451534
cg21995068	LOC100134868	-0.124281	9.36e-05	0.00253376
cg12963656	LOC152225	-0.124935	6.98e-05	0.00215688
cg02353916	LOC285550	-0.14067	0.000256026	0.00462424
cg13084677	LOC401127	-0.123835	3.61e-05	0.00154611
cg12744859	LOC404266	-0.125955	2.7e-07	0.000302715
cg18128914	LOXL1	-0.120374	0.00111521	0.0122606
cg06739107	LPP	-0.135331	5.55e-05	0.00191435
cg02012974	LRIG1	-0.12016	5.15e-05	0.00184035
cg07063912	LRRFIP1	-0.125148	3.41e-05	0.00150406
cg18854765	LRRIQ3	-0.144541	1.23e-05	0.000953154
cg23079808	LTBR	-0.123789	4.3e-06	0.000639649
cg16097772	LYZ	-0.129043	0.000153941	0.00337666
cg19499884	LZTS2	-0.128542	6.32e-06	0.000734453
cg03371275	MAML2	-0.132217	2.67e-05	0.00133861
cg03418002	MAML3	-0.166584	1.11e-05	0.000915443
cg02193956	MANBA	-0.151334	1.06e-05	0.000897137
cg00235484	MAP7	-0.147223	2.52e-05	0.00130513
cg10458216	MBNL2	-0.131622	6.94e-07	0.000358226
cg16604566	MBP	-0.1292	9.3e-06	0.000850125
cg00211174	MCM2	-0.126619	6.15e-05	0.00201658
cg09416908	ME3	-0.120758	0.000116633	0.00286996
cg24474182	MED12L	-0.160701	6.26e-05	0.00203578
cg01982833	MED21	-0.136826	9.03e-06	0.000839845
cg00682263	MEGF11	-0.132466	2.42e-05	0.00128207
cg15649236	MIR10A	-0.121871	5.14e-07	0.000335798		MicroRNA 10a
cg00444740	MIR1208	-0.120543	0.000227076	0.00428398		MicroRNA 1208
cg01580228	MIR1304	-0.127251	1.51e-05	0.00103536		MicroRNA 1304
cg07737292	MIR138-2	-0.125912	1.47e-05	0.00102508		MIR138-2
cg04238983	MIR612	-0.120212	3.48e-06	0.00060106		MIR612
cg01440934	MKNK1	-0.131366	3.98e-05	0.00162223
cg05581469	MLL2	-0.123054	4.16e-06	0.000632142
cg12182708	MMS19	-0.127002	3.35e-05	0.00149133
cg01261013	MORC3	-0.132337	6.73e-06	0.000749076
cg07110356	MPO	-0.140016	6.18e-07	0.000348591
cg15210526	MPZL1	-0.146108	3.67e-05	0.00155713
cg01441127	MR1	-0.123821	8.96e-05	0.00247186
cg23924737	MRPS23	-0.123349	1.06e-06	0.000408418
cg04781916	MSH6	-0.141672	0.000103537	0.002681
cg15044453	MTHFD1L	-0.123944	3.21e-05	0.00146341
cg21549285	MX1	-0.268176	8.86e-05	0.00245606
cg19584136	MXI1	-0.150627	3.27e-05	0.00147403		MAX Interactor 1, Dimerization Protein
cg04739200	MYB	-0.155068	3.57e-05	0.00153663
cg09284275	MYH11	-0.123017	2.32e-05	0.00126191
cg27546431	MYO1C	-0.126561	2.05e-06	0.000495402
cg01701649	N4BP1	-0.126599	0.000103467	0.00267953
cg17301248	NAA25	-0.133795	4.05e-05	0.00163508
cg05655915	NARF	-0.124914	2.62e-05	0.00132671
cg04598292	NCAPG2	-0.120087	1.09e-06	0.00041402
cg00382999	NCK1	-0.140593	3.9e-05	0.00160867
cg19828970	NCK2	-0.15158	1.08e-05	0.000905607
cg00765705	NCOR2	-0.138721	1.72e-06	0.000472859
cg21893651	NCRNA00171	-0.140546	9.03e-06	0.000839845
cg14022913	NEIL3	-0.135606	7.5e-05	0.00224333
cg09303642	NFE2	-0.120649	8.77e-05	0.00244328
cg14101485	NFIC	-0.134121	1.55e-05	0.00105118
cg22675447	NIPAL3	-0.147243	4.88e-07	0.000333013
cg06059360	NKTR	-0.122126	0.000131736	0.00308353
cg07839457	NLRC5	-0.155069	0.000305743	0.00517328
cg21991396	NLRP3	-0.136667	7.91e-05	0.00230621
cg12709880	NPC1	-0.133157	2.59e-05	0.00131861
cg02241759	NR1I2	-0.122885	1.76e-05	0.00110901
cg02041484	NRF1	-0.126332	5.15e-05	0.00183929
cg13226290	NSFL1C	-0.140568	2.13e-05	0.0012094
cg25505880	NXF1	-0.121889	1.87e-05	0.00114205
cg20098015	ODF3B	-0.132338	0.000648208	0.00847502
cg25031824	P2RX1	-0.123844	2.6e-05	0.00131966
cg12754495	P2RY12	-0.147132	9.27e-05	0.0025207
cg18568335	PACS2	-0.12392	3.11e-05	0.00144304
cg27183173	PALM	-0.155227	0.00429251	0.0319204
cg05994974	PARP12	-0.159916	6.45e-07	0.000353228		Poly(ADP-Ribose) Polymerase Family Member 12
cg22930808	PARP9	-0.278639	5.25e-06	0.00069531
cg18659081	PARVG	-0.12433	6.56e-05	0.0020885
cg13982956	PBX3	-0.126773	5.89e-06	0.0007217
cg25084760	PCCA	-0.163201	1.86e-06	0.00048343
cg14417099	PCMT1	-0.135606	5.99e-05	0.00199035
cg10934870	PCYOX1	-0.130918	7.02e-05	0.0021635
cg19573490	PCYT2	-0.12549	1.73e-05	0.00110134
cg18729704	PDCD11	-0.124964	2.45e-05	0.00128835
cg01591037	PDE6H	-0.13803	5.5e-05	0.00190228
cg22943115	PDGFRB	-0.12839	0.000257297	0.00463937
cg04397884	PELI2	-0.122026	3.32e-05	0.00148292
cg15590153	PGM1	-0.138092	1.57e-05	0.00105726
cg17586302	PHACTR2	-0.128122	0.000287859	0.00497906
cg13381110	PHLPP1	-0.148713	5.92e-05	0.00197924
cg04592811	PIGL	-0.124472	4.12e-05	0.00164934
cg03340036	PIGY	-0.133253	0.000153737	0.00337454
cg24967811	PITPNM2	-0.128174	0.000130403	0.00306407
cg03594078	PIWIL2	-0.128748	4.04e-05	0.00163425
cg27340480	PLAUR	-0.124602	7.4e-05	0.00222796
cg00859441	PLBD2	-0.121433	0.000158794	0.0034424
cg07480762	PLCH1	-0.145897	3.91e-06	0.000618303
cg15628518	PLEC1	-0.124633	8.61e-08	0.000247874
cg06981309	PLSCR1	-0.192391	8.44e-07	0.000383754
cg00760203	PLXDC1	-0.120373	1.51e-06	0.000451534		Plexin Domain Containing 1
cg26514961	PLXNC1	-0.123308	0.000153649	0.00337319		Plexin C1
cg12415479	PLXND1	-0.12032	2.39e-07	0.000298618		Plexin D1
cg22712983	PNKD	-0.14018	4.62e-05	0.00174337
cg00453717	POLD3	-0.136781	2.41e-05	0.00127965
cg23745290	PPA2	-0.146923	2.36e-05	0.00126955
cg18537222	PPARG	-0.132108	0.000153232	0.00336923
cg06070324	PPCDC	-0.121993	6.77e-06	0.000750721
cg11833768	PPP2R5E	-0.149173	2.37e-05	0.0012703
cg07033722	PPT1	-0.136408	3.31e-05	0.00148283
cg24906819	PRAGMIN	-0.131434	1.3e-05	0.000975131
cg10426076	PRG2	-0.140027	1.24e-05	0.000956872
cg13345558	PRKAA1	-0.122477	1.09e-05	0.000909412		Protein Kinase AMP-Activated Catalytic Subunit Alpha 1
cg01058360	PRKAG2	-0.132069	3.1e-05	0.00144268		Protein Kinase AMP-Activated Non-Catalytic Subunit Gamma 2
cg09697978	PRKD3	-0.150328	3.12e-05	0.00144626		Protein Kinase D3
cg22152931	PRKRIP1	-0.138376	3.24e-06	0.000589533		PRKR Interacting Protein 1 (IL11 Inducible)
cg10061770	PRMT7	-0.133938	2.12e-06	0.000499919
cg25181170	PRTFDC1	-0.144375	9.66e-06	0.000863761
cg09322555	PSMB9	-0.12343	1.74e-05	0.00110414
cg22694271	PSRC1	-0.134538	2.95e-05	0.00140786
cg02307823	PTEN	-0.148944	2.8e-05	0.00137057
cg24175188	PXK	-0.149007	1.65e-05	0.00107981
cg17959183	RAB10	-0.124934	0.000114944	0.00284806
cg03363565	RAB11FIP3	-0.12199	1.51e-05	0.00103551
cg26298914	RAD51L1	-0.133119	0.000143378	0.00324132
cg19447962	RAI1	-0.123777	8.22e-07	0.000382854
cg04756491	RBM23	-0.129564	0.000117975	0.00288791
cg03381237	RBM33	-0.120664	2.32e-07	0.000298618
cg16441068	RCOR1	-0.133016	0.000343295	0.0055738
cg01766396	RFTN2	-0.144349	7.19e-06	0.000768162
cg05991009	RFX8	-0.132227	3.18e-05	0.00145693
cg05111779	RGS6	-0.128162	6.32e-05	0.00204486
cg02506984	RHEB	-0.135067	2.24e-05	0.00123763
cg26639076	RIF1	-0.121582	0.000113096	0.00281932
cg23625388	RIN3	-0.128624	4.46e-05	0.00171279
cg14272075	RNF126P1	-0.122059	4.53e-05	0.00172629
cg13573582	RNF220	-0.124518	0.000100602	0.00263437
cg14468692	RNH1	-0.122268	5.26e-06	0.000695936
cg17766305	RNLS	-0.120773	9.68e-06	0.00086453
cg01241390	RNU5E	-0.120984	9.38e-05	0.00253768
cg12405599	RPN1	-0.14811	1.41e-05	0.00100828
cg10287970	RREB1	-0.120287	2.25e-05	0.00124087
cg23213327	RSAD2	-0.135446	6.81e-06	0.000751763
cg03664994	RTN4	-0.137726	3.36e-05	0.00149381
cg06655349	S1PR2	-0.125184	0.000239102	0.00442572
cg14187687	SAMD4A	-0.149791	1.12e-05	0.000919631		Sterile Alpha Motif Domain Containing 4A
cg07197493	SBF2	-0.149288	1.33e-05	0.000983061
cg13870520	SCARB2	-0.135428	1.09e-05	0.000908909
cg15980656	SDC2	-0.126355	0.000196079	0.00391671
cg14516183	SEC22A	-0.155085	8.94e-06	0.000838108
cg12339328	SEC23B	-0.120626	1.17e-05	0.00093554
cg13062455	SEL1L	-0.129624	0.000158735	0.00344147
cg03221483	SEP9	-0.122366	0.000106179	0.00271859
cg15312943	SERGEF	-0.132516	5.7e-05	0.00193978
cg15835339	SFTA1P	-0.128679	1.54e-05	0.00104703
cg17329648	SFXN5	-0.122717	3.74e-06	0.000612481
cg09140723	SGPL1	-0.153595	1.21e-05	0.00094911
cg13599613	SH2D3C	-0.132009	7.41e-05	0.00223071
cg17222829	SHANK2	-0.127233	1.38e-05	0.000999855
cg19356022	SHC1	-0.120561	4.46e-05	0.00171213
cg26105956	SHE	-0.121096	0.000337623	0.00551012
cg02206980	SIRT5	-0.122018	0.000100622	0.00263456
cg08700083	SLAIN2	-0.130187	0.000176692	0.00367231
cg18997983	SLC12A7	-0.131822	2.11e-06	0.000498283
cg24058365	SLC16A4	-0.134202	3.31e-05	0.00148283
cg18446110	SLC23A1	-0.120479	1.74e-05	0.00110283
cg24323958	SLC25A24	-0.121085	4.92e-06	0.000674839
cg10011091	SLC25A32	-0.124842	3.96e-05	0.00161873
cg02190353	SLC25A37	-0.150686	8.16e-05	0.00234659
cg07658508	SLC26A1	-0.123022	8.87e-05	0.00245774
cg11266682	SLC2A9	-0.122335	0.000437486	0.00653709
cg16061354	SLC43A2	-0.131376	8.1e-06	0.000805346
cg13603332	SLC44A1	-0.131306	2.56e-05	0.0013121
cg15527515	SLC7A8	-0.120858	6.93e-05	0.00215024
cg25025181	SMYD3	-0.126159	0.000104505	0.00269525
cg01323964	SNORA22	-0.128368	6.97e-05	0.00215553
cg25773585	SNORA30	-0.121115	0.000116468	0.00286797
cg11606261	SP1	-0.134306	8.91e-07	0.000388712
cg19782686	SPATA5	-0.128851	7.83e-06	0.000796314
cg15945333	SPI1	-0.125128	9.5e-05	0.00255589
cg14480116	SPRED2	-0.145137	2.44e-05	0.00128416
cg24608504	SPTBN1	-0.136793	0.000206516	0.00404289
cg02927682	SSBP3	-0.143001	2.56e-06	0.000541769
cg17036458	SSH2	-0.135642	0.000671254	0.00866692
cg15609734	STAM	-0.138092	9.99e-05	0.00262408
cg02770745	STIM1	-0.162827	4.48e-06	0.000649782
cg05171937	STK38L	-0.133043	1.12e-05	0.000919631
cg06001524	STX8	-0.123998	7.15e-05	0.00218313
cg24746726	SULT1E1	-0.141205	9.87e-06	0.000871914
cg11597277	SUMO1P1	-0.132094	0.000156664	0.00341348
cg14685356	SYNE1	-0.136575	2.62e-05	0.00132552
cg09572125	SYNGAP1	-0.125434	1.01e-06	0.000401456
cg03048029	SYNJ1	-0.145931	5.45e-05	0.00189505
cg14533068	SYNJ2	-0.128763	4.53e-06	0.00065325
cg10296205	SYTL3	-0.121125	3.66e-05	0.00155465
cg01521397	TAF4	-0.129704	0.000165652	0.00353361
cg17627898	TAOK3	-0.135735	1.05e-05	0.000895488
cg13304638	TBCD	-0.144992	0.000125954	0.00300074
cg01232717	TCEB1	-0.123602	0.000512034	0.007247
cg04858164	TCF12	-0.132893	0.000358817	0.00573797
cg23254569	TEAD3	-0.120341	2.21e-05	0.0012312
cg12306086	TET2	-0.13324	5.32e-05	0.00187112
cg21519701	TEX2	-0.127715	0.000224642	0.0042558
cg11703212	TFDP1	-0.132326	0.000119769	0.00291558
cg25938803	THADA	-0.153744	1.99e-05	0.00117773
cg14578677	TLR6	-0.146927	2.76e-05	0.00136131
cg12196294	TMCC1	-0.129987	0.000167991	0.00356131
cg19023589	TMCO3	-0.151885	2.49e-05	0.00129677
cg01155092	TMEM100	-0.12224	8.83e-05	0.0024525
cg05240166	TMEM159	-0.130846	6.05e-06	0.000726896
cg01477971	TMEM182	-0.124346	0.000318469	0.00530696
cg02769705	TMEM183B	-0.128959	3.99e-05	0.00162422
cg18507018	TMEM55A	-0.132007	0.000638309	0.00838748
cg21500909	TMEM91	-0.127718	7.41e-06	0.000777313
cg07772516	TMOD2	-0.141783	8.9e-06	0.000835991
cg09727050	TNFAIP6	-0.133343	0.000287385	0.00497343
cg23548201	TNK2	-0.143281	4.69e-06	0.000659695
cg03156546	TNRC6A	-0.121839	0.000236963	0.00440302
cg07488141	TNS3	-0.125586	2.11e-05	0.00120333
cg04244170	TOMM70A	-0.1456	4.11e-06	0.000630513
cg07291836	TP53RK	-0.149457	3.86e-05	0.00159879
cg23342367	TPD52	-0.144193	8.13e-05	0.00234135
cg20168849	TPRG1	-0.123637	3.48e-05	0.00152009
cg10721755	TRAF5	-0.134141	3.77e-05	0.00157916
cg14220170	TRANK1	-0.122335	2.99e-05	0.00141668
cg02160684	TRIB1	-0.155712	5.09e-05	0.00182944
cg09145126	TRIM13	-0.146476	1.54e-06	0.00045583
cg13935558	TRIM24	-0.121232	1.91e-06	0.000487535
cg08850243	TRIM26	-0.126567	4.65e-05	0.00174811
cg08279189	TRIM27	-0.162093	4.78e-05	0.00177105
cg17313269	TRIM38	-0.139454	2.23e-05	0.00123553
cg18897025	TSLP	-0.134613	0.000161088	0.00347086
cg11384744	TSPAN13	-0.128306	5.29e-05	0.00186653
cg24012880	TSPAN18	-0.124211	1.78e-05	0.00111369
cg24207698	TTC21B	-0.126149	1.16e-05	0.00093333
cg01584932	TTC31	-0.122776	6.13e-05	0.0020133
cg20090162	TTC7A	-0.12696	9.4e-06	0.000853528
cg01827633	TTLL4	-0.121887	6.22e-05	0.00202982
cg11083848	TTLL5	-0.140922	3.1e-05	0.00144262
cg18571045	TUBGCP3	-0.123122	2.57e-05	0.00131376
cg03463948	UBASH3B	-0.1454	2.44e-05	0.00128398
cg18351781	UHRF1	-0.121815	8.96e-05	0.00247186
cg16624482	UMODL1	-0.138764	7.99e-06	0.000803154
cg06881398	USP24	-0.1476	3.5e-05	0.00152289
cg01719995	USP38	-0.127313	1.22e-06	0.000426465
cg15075988	VDAC2	-0.126805	4.14e-05	0.00165188
cg22825487	VNN3	-0.131803	0.000323357	0.00536004
cg07006935	VOPP1	-0.124905	1.64e-05	0.00107777
cg00009088	VPS37C	-0.141451	0.00034047	0.00554201
cg21090866	VPS53	-0.130761	0.000162619	0.00348964
cg15612945	VPS54	-0.135141	0.000160603	0.00346417
cg07227049	VRK2	-0.133138	0.000285251	0.00495228
cg02392124	WAC	-0.122263	6.34e-05	0.00204871
cg23363263	WDFY1	-0.149174	3.86e-05	0.00159817
cg16163847	WDFY2	-0.132864	2.43e-05	0.00128285
cg25197500	WDR45L	-0.142862	4.33e-05	0.0016897
cg04903759	WDR49	-0.12907	0.000204371	0.00401751
cg15058645	WIPF1	-0.125961	2.08e-05	0.00119743
cg25161129	WIPI1	-0.125483	9.3e-05	0.00252327
cg20367388	WIPI2	-0.129397	6.76e-05	0.00212498
cg02889774	XPO7	-0.121261	1.72e-05	0.00109803
cg04313565	XYLT1	-0.127978	1.41e-05	0.00100694
cg02111865	YPEL5	-0.121651	0.000373767	0.00588983
cg12297590	ZDHHC14	-0.127336	4.15e-08	0.000209621
cg17090611	ZDHHC2	-0.142262	7.1e-05	0.00217481
cg17594003	ZEB2	-0.125459	4.58e-05	0.00173477
cg11814087	ZFR	-0.137783	6.81e-06	0.000751763
cg21199093	ZMYM4	-0.140124	3.29e-05	0.00147566
cg09046309	ZMYND8	-0.133542	7.71e-05	0.00227854
cg15427793	ZNF117	-0.132981	0.00270655	0.0230063
cg16402415	ZNF280D	-0.131612	0.000100534	0.0026337
cg17100158	ZNF385B	-0.124698	6.32e-05	0.00204588
cg08764162	ZNF438	-0.137381	2.39e-05	0.00127461
cg07000116	ZNF689	-0.13179	1.87e-05	0.00114187
cg06122230	ZNFX1	-0.13377	2.36e-05	0.00126881
cg09704136	ZYX	-0.128448	7.67e-06	0.00078869

## Sheet: Top 10 hypomethylated site
	Supplementary Table 3-3. Top 10 hypomethylated sites
		Feature	CGI
cg22930808	PARP9	5'UTR	shore	-0.278639	5.25e-06	0.00069531		Poly(ADP-Ribose) Polymerase Family Member 9
cg21549285	MX1	5'UTR	shore	-0.268176	8.86e-05	0.00245606		MX Dynamin Like GTPase 1
cg05696877	IFI44L	5'UTR	opensea	-0.265561	3.14e-05	0.0014503		Interferon Induced Protein 44 Like
cg10632894	HLA-DRB1	Body	shore	-0.216721	0.00248731	0.0216484		Major Histocompatibility Complex, Class II, DR Beta 1
cg05552874	IFIT1	Body	opensea	-0.2159	2.18e-05	0.00122462		Interferon Induced Protein With Tetratricopeptide Repeats 1
cg06981309	PLSCR1	5'UTR	shore	-0.192391	8.44e-07	0.000383754		Phospholipid Scramblase 1
cg25344401	FOXK1	Body	shelf	-0.170406	2.19e-05	0.00122646		Forkhead Box K1
cg01028142	CMPK2	Body	shore	-0.168022	3.55e-05	0.0015334		Cytidine/Uridine Monophosphate Kinase 2
cg19990651	HLA-DPB1	Body	island	-0.167387	0.000153378	0.00337057		Major Histocompatibility Complex, Class II, DP Beta 1
cg03418002	MAML3	Body	shore	-0.166584	1.11e-05	0.000915443		Mastermind Like Transcriptional Coactivator 3

## Sheet: hypermethylated_sites
Supplemental Table 3-4. Methylation sites significantly hypermethylated in SSc vs Normal
Infinium Probe Name	feature	cgi	Gene name	deltaBeta	P.Value	BH.P.value
cg02530824	TSS200	island	PF4	0.197813	0.000108315	0.00274904
cg11917734	Body	shore	HLA-C	0.188361	0.00297	0.0245642
cg02902412	Body	island	ATP9B	0.183774	9.8e-08	0.000252996
cg06834998	TSS200	island	PF4	0.166506	0.000289668	0.00499961
cg06958535	1stExon	opensea	LAX1	0.163952	2.21e-07	0.000297913
cg05799811	Body	opensea	CD247	0.162623	3.48e-06	0.00060106
cg21043213	1stExon	island	PF4	0.159349	0.000287096	0.00497101
cg04042333	IGR	shelf	NA	0.154644	5.75e-07	0.000343955
cg02251850	Body	shore	RPTOR	0.149732	2.56e-07	0.000300997
cg17972213	Body	shelf	S1PR1	0.149636	5.38e-07	0.000340412
cg07119830	Body	opensea	TRIM8	0.149484	1.71e-07	0.000291469
cg13955347	IGR	shelf	NA	0.149418	4.68e-08	0.000218475
cg25140783	3'UTR	island	RCAN3	0.148267	8.97e-07	0.000388712
cg12073436	IGR	opensea	NA	0.148005	1.79e-06	0.000479271
cg16072462	TSS200	island	PF4	0.147829	0.000600886	0.00806129
cg00446123	TSS200	shore	LIME1	0.1478	6.37e-06	0.000737326
cg14001486	Body	opensea	PRKCH	0.146634	7.54e-07	0.000373645
cg13521018	Body	opensea	INPP5A	0.146076	5.63e-06	0.000710078
cg07786657	Body	opensea	CD247	0.146042	2.71e-06	0.000552971
cg21577598	Body	shore	CCDC57	0.145694	3.73e-06	0.000611195
cg05509609	TSS200	island	PF4	0.145129	0.00165709	0.0162244
cg26934362	Body	shelf	LPCAT1	0.145089	7.85e-07	0.000374566
cg10099732	Body	island	ZFP36L1	0.144531	2.81e-06	0.000561802
cg19123356	5'UTR	opensea	FAM49B	0.144292	1.5e-07	0.000280217
cg15158783	1stExon	island	PF4	0.144271	0.000333314	0.00546133
cg13461622	1stExon	opensea	RUNX3	0.143969	1.23e-06	0.000427703
cg22203628	IGR	opensea	NA	0.14269	4.37e-05	0.00169593
cg16265859	3'UTR	opensea	UBR4	0.142147	5.09e-08	0.000218862
cg08450017	TSS200	opensea	CXCR6	0.141357	2.06e-05	0.00119193
cg15398841	TSS200	island	PF4	0.138391	0.00101228	0.0114736
cg16272981	Body	island	LPCAT1	0.137653	2.06e-05	0.00119193
cg13872627	Body	shore	HLA-C	0.136943	0.00051349	0.00726029
cg02374486	TSS1500	shelf	PRF1	0.136921	7.12e-07	0.000363995
cg18011672	IGR	shelf	NA	0.135172	1.91e-07	0.000292549
cg14437551	TSS200	opensea	LTA	0.135059	6.02e-05	0.00199665
cg08169020	Body	island	ZFP36L1	0.135008	5.48e-05	0.00189949
cg26348243	5'UTR	opensea	LTA	0.134751	4.48e-06	0.000649782
cg04344000	Body	shore	DCBLD1	0.134282	4.31e-08	0.000212949
cg00071250	1stExon	opensea	FASLG	0.133676	3.46e-07	0.000320396
cg07586956	IGR	opensea	NA	0.133669	1.36e-06	0.000439887
cg21805179	TSS1500	opensea	MPHOSPH9	0.133451	7.64e-09	0.000107041
cg27058497	TSS200	opensea	RUNX3	0.133374	1.31e-05	0.000978325
cg09473725	Body	opensea	CD247	0.132967	7.94e-07	0.000376721
cg21201401	TSS200	shore	LIME1	0.132229	9.29e-05	0.00252239
cg07706695	IGR	opensea	NA	0.132198	7.49e-06	0.000781125
cg12077963	Body	opensea	ANKFY1	0.131574	1.32e-06	0.000437935
cg09973676	5'UTR	opensea	PAG1	0.13152	0.000307461	0.0051917
cg13440692	IGR	shelf	NA	0.13075	2.36e-05	0.00126881
cg09115713	Body	opensea	FAM38A	0.130133	4.11e-07	0.000326814
cg06208288	IGR	opensea	NA	0.130014	4.74e-06	0.000662688
cg10161121	TSS200	opensea	FASLG	0.129905	6.07e-07	0.000348591
cg17756730	IGR	opensea	NA	0.129809	4.63e-07	0.0003318
cg03388043	Body	shore	CCDC57	0.129764	1.97e-05	0.00116981
cg19460909	IGR	opensea	NA	0.129745	0.00256665	0.0221446
cg09354050	Body	opensea	UBASH3A	0.129745	4.03e-06	0.00062513
cg23114435	Body	opensea	CD247	0.129654	9.04e-07	0.000388712
cg06987246	Body	shelf	ZNF853	0.129635	1.4e-05	0.00100694
cg23893629	TSS1500	opensea	LAX1	0.129591	6.55e-07	0.000353997
cg13152690	IGR	opensea	NA	0.129256	1.45e-06	0.000445792
cg23463608	5'UTR	island	GNG7	0.129161	5.11e-06	0.00068679
cg25155064	Body	opensea	MPZL3	0.129107	3.82e-06	0.00061483
cg15392364	Body	opensea	IL19	0.1291	8.28e-07	0.00038338
cg00942920	Body	opensea	LAX1	0.129097	1.56e-06	0.000458081
cg21057323	Body	opensea	CDC42BPB	0.128865	7.71e-07	0.000373645
cg14957089	IGR	island	NA	0.128609	1.45e-06	0.000445792
cg14165142	Body	shore	CDC25B	0.128597	1.39e-06	0.00044119
cg05464506	IGR	island	NA	0.128556	6.09e-07	0.000348591
cg22459924	5'UTR	island	GNG7	0.128489	2.36e-06	0.00052235
cg13584531	TSS200	opensea	MGAT4A	0.128403	2.57e-07	0.000300997
cg07732037	TSS1500	opensea	MPHOSPH9	0.12805	2.99e-11	4.74e-06
cg02061660	Body	opensea	SLC25A46	0.127853	0.000187491	0.00381171
cg08796342	TSS200	opensea	TC2N	0.127651	1.58e-06	0.000458867
cg08140114	Body	opensea	HECA	0.127602	1.97e-06	0.000490683
cg07218880	TSS1500	shore	UPF3A	0.12736	8.46e-07	0.000383831
cg17711527	1stExon	opensea	LAX1	0.127348	8.36e-07	0.000383489
cg15625636	5'UTR	opensea	GPR65	0.127054	1.73e-06	0.000472859
cg07107916	TSS1500	shore	PPP2R5A	0.126985	3.75e-05	0.0015743
cg24010658	Body	opensea	ZC3H3	0.126944	2.87e-06	0.000566101
cg05756492	Body	shore	RASSF5	0.126849	8.26e-07	0.000383287
cg18430255	Body	opensea	GRK5	0.126784	1.91e-07	0.000292549
cg01367992	Body	opensea	LY9	0.126759	1.76e-06	0.000475167
cg09800500	Body	opensea	BCAT1	0.126758	1.31e-06	0.000437263
cg26360197	Body	shelf	RPTOR	0.126635	1.19e-06	0.000424808
cg17587997	5'UTR	opensea	FYN	0.126623	1.4e-06	0.00044119
cg06022561	Body	opensea	D2HGDH	0.126468	2.44e-06	0.000527775
cg01772743	IGR	shore	NA	0.126381	3.41e-06	0.000597396
cg06706159	Body	island	MAST3	0.126347	5.1e-07	0.000335798
cg24437859	Body	opensea	PTPN6	0.126342	5.15e-07	0.000335798
cg22512531	Body	opensea	CRTAM	0.126335	5.54e-07	0.000342448
cg07569288	Body	shelf	RPS11	0.126311	2.01e-06	0.000492693
cg22726155	IGR	island	NA	0.12618	3.87e-06	0.000617273
cg17477578	IGR	opensea	NA	0.125921	1.2e-06	0.000425043
cg08539991	5'UTR	shelf	ZBTB32	0.125675	9.88e-07	0.000399866
cg25247558	IGR	opensea	NA	0.125065	3.9e-08	0.000204035
cg20516032	Body	opensea	PVT1	0.124586	2.34e-07	0.000298618
cg00805874	Body	island	ZBTB12	0.124556	1.61e-05	0.00106697
cg09088496	Body	opensea	SPATA13	0.124399	1.16e-06	0.000423689
cg00255699	3'UTR	opensea	TRIT1	0.124278	3.46e-07	0.000320396
cg08859278	TSS1500	opensea	ZAP70	0.12424	8.84e-07	0.000386617
cg20391948	5'UTR	island	ANKRD11	0.124233	3.04e-07	0.000315769
cg26033526	Body	shore	TAP1	0.124068	0.000269935	0.00477821
cg09993145	TSS1500	opensea	RUNX3	0.124065	0.000156538	0.00341155
cg13603599	Body	shore	AIP	0.124049	1.37e-06	0.000441046
cg23280720	Body	opensea	HECA	0.124044	7.75e-06	0.000792508
cg02919090	Body	opensea	DAPK2	0.124039	2.19e-08	0.000151107
cg19344545	IGR	island	NA	0.123995	2.13e-06	0.000501776
cg21805118	TSS200	shore	DIABLO	0.123895	1.13e-06	0.000419646
cg21422623	Body	opensea	ITPKB	0.123767	7.91e-07	0.000376127
cg12413156	5'UTR	shore	LIME1	0.123587	2.12e-06	0.000499919
cg17095147	Body	opensea	WDR1	0.123552	9.14e-06	0.000843599
cg09032544	Body	opensea	CD247	0.123401	7.34e-06	0.000773845
cg25429672	5'UTR	shore	UCP2	0.123378	1.2e-06	0.000425043
cg07573020	3'UTR	opensea	ANKH	0.123299	4.46e-07	0.000330345
cg24215459	5'UTR	opensea	TNIP3	0.123294	1.98e-07	0.000292549
cg13210595	Body	opensea	CD247	0.123228	4.68e-07	0.0003318
cg14518276	Body	shelf	TRAF1	0.123022	8.6e-07	0.00038498
cg01823925	Body	opensea	ADAM19	0.122936	7.61e-07	0.000373645
cg14356919	Body	island	COL18A1	0.122672	3.96e-05	0.00161784
cg16519923	Body	shore	ITGAL	0.122601	7.51e-06	0.000781936
cg16278496	TSS200	opensea	C14orf64	0.122569	1.22e-05	0.000952095
cg12524168	Body	opensea	F2R	0.122312	5.42e-08	0.000226239
cg21330949	IGR	opensea	NA	0.122289	1.52e-07	0.000280217
cg08109681	3'UTR	shore	RPS6KA2	0.122007	6.29e-07	0.000351088
cg15253304	IGR	opensea	NA	0.12194	1.66e-07	0.000289196
cg04461101	IGR	opensea	NA	0.121621	0.00192114	0.0180222
cg14931884	Body	shore	DIP2C	0.121595	5.07e-05	0.00182518
cg02352716	IGR	shelf	NA	0.12136	1.37e-06	0.000441046
cg22991506	Body	shore	C14orf182	0.121347	2e-06	0.000491802
cg01735277	5'UTR	shelf	CSK	0.121324	6.39e-07	0.000352588
cg12375586	5'UTR	opensea	C7orf44	0.121283	5.05e-08	0.000218862
cg10859442	Body	opensea	UCP3	0.121243	1.08e-07	0.000264639
cg05132828	5'UTR	opensea	PITPNM2	0.121239	1.18e-06	0.000424808
cg25170017	Body	shore	EHD1	0.12116	5.87e-06	0.000721629
cg03971555	3'UTR	shore	PIK3CD	0.121028	4.63e-05	0.00174465
cg17741993	Body	shelf	TNF	0.121007	4.14e-07	0.000326814
cg07076751	Body	opensea	KIAA1949	0.120637	1.14e-06	0.000419646
cg15173780	IGR	opensea	NA	0.120579	1.83e-07	0.000292549
cg13860281	Body	shore	VOPP1	0.120473	1.34e-05	0.000985932
cg27183818	IGR	opensea	NA	0.120383	1.26e-06	0.000430521
cg08145373	Body	shore	CD81	0.120233	7.88e-07	0.000375292
cg18991321	Body	opensea	AGFG2	0.120194	1.03e-06	0.000402765
cg21959598	Body	shore	VOPP1	0.120089	7.74e-07	0.000373645
cg20477259	Body	shelf	TNF	0.120008	1.42e-06	0.000444106

## Sheet: hypermethylated_genes
Supplemental Table 3-5. Methylation genes significantly hypermethylated in SSc vs Normal
Infinium Probe Name	Gene name	deltaBeta	P.Value	BH.P.value
cg01823925	ADAM19	0.122936	7.61e-07	0.000373645
cg18991321	AGFG2	0.120194	1.03e-06	0.000402765
cg13603599	AIP	0.124049	1.37e-06	0.000441046
cg12077963	ANKFY1	0.131574	1.32e-06	0.000437935
cg07573020	ANKH	0.123299	4.46e-07	0.000330345
cg20391948	ANKRD11	0.124233	3.04e-07	0.000315769
cg02902412	ATP9B	0.183774	9.8e-08	0.000252996
cg09800500	BCAT1	0.126758	1.31e-06	0.000437263
cg22991506	C14orf182	0.121347	2e-06	0.000491802
cg16278496	C14orf64	0.122569	1.22e-05	0.000952095
cg12375586	C7orf44	0.121283	5.05e-08	0.000218862
cg21577598	CCDC57	0.145694	3.73e-06	0.000611195
cg05799811	CD247	0.162623	3.48e-06	0.00060106
cg08145373	CD81	0.120233	7.88e-07	0.000375292
cg14165142	CDC25B	0.128597	1.39e-06	0.00044119
cg21057323	CDC42BPB	0.128865	7.71e-07	0.000373645
cg14356919	COL18A1	0.122672	3.96e-05	0.00161784
cg22512531	CRTAM	0.126335	5.54e-07	0.000342448
cg01735277	CSK	0.121324	6.39e-07	0.000352588
cg08450017	CXCR6	0.141357	2.06e-05	0.00119193
cg06022561	D2HGDH	0.126468	2.44e-06	0.000527775
cg02919090	DAPK2	0.124039	2.19e-08	0.000151107
cg04344000	DCBLD1	0.134282	4.31e-08	0.000212949
cg21805118	DIABLO	0.123895	1.13e-06	0.000419646
cg14931884	DIP2C	0.121595	5.07e-05	0.00182518
cg25170017	EHD1	0.12116	5.87e-06	0.000721629
cg12524168	F2R	0.122312	5.42e-08	0.000226239
cg09115713	FAM38A	0.130133	4.11e-07	0.000326814
cg19123356	FAM49B	0.144292	1.5e-07	0.000280217
cg00071250	FASLG	0.133676	3.46e-07	0.000320396
cg17587997	FYN	0.126623	1.4e-06	0.00044119
cg23463608	GNG7	0.129161	5.11e-06	0.00068679
cg15625636	GPR65	0.127054	1.73e-06	0.000472859
cg18430255	GRK5	0.126784	1.91e-07	0.000292549
cg08140114	HECA	0.127602	1.97e-06	0.000490683
cg11917734	HLA-C	0.188361	0.00297	0.0245642
cg15392364	IL19	0.1291	8.28e-07	0.00038338
cg13521018	INPP5A	0.146076	5.63e-06	0.000710078
cg16519923	ITGAL	0.122601	7.51e-06	0.000781936
cg21422623	ITPKB	0.123767	7.91e-07	0.000376127
cg07076751	KIAA1949	0.120637	1.14e-06	0.000419646
cg06958535	LAX1	0.163952	2.21e-07	0.000297913
cg00446123	LIME1	0.1478	6.37e-06	0.000737326
cg26934362	LPCAT1	0.145089	7.85e-07	0.000374566
cg14437551	LTA	0.135059	6.02e-05	0.00199665
cg01367992	LY9	0.126759	1.76e-06	0.000475167
cg06706159	MAST3	0.126347	5.1e-07	0.000335798
cg13584531	MGAT4A	0.128403	2.57e-07	0.000300997
cg21805179	MPHOSPH9	0.133451	7.64e-09	0.000107041
cg25155064	MPZL3	0.129107	3.82e-06	0.00061483
cg09973676	PAG1	0.13152	0.000307461	0.0051917
cg02530824	PF4	0.197813	0.000108315	0.00274904
cg03971555	PIK3CD	0.121028	4.63e-05	0.00174465
cg05132828	PITPNM2	0.121239	1.18e-06	0.000424808
cg07107916	PPP2R5A	0.126985	3.75e-05	0.0015743
cg02374486	PRF1	0.136921	7.12e-07	0.000363995
cg14001486	PRKCH	0.146634	7.54e-07	0.000373645
cg24437859	PTPN6	0.126342	5.15e-07	0.000335798
cg20516032	PVT1	0.124586	2.34e-07	0.000298618
cg05756492	RASSF5	0.126849	8.26e-07	0.000383287
cg25140783	RCAN3	0.148267	8.97e-07	0.000388712
cg07569288	RPS11	0.126311	2.01e-06	0.000492693
cg08109681	RPS6KA2	0.122007	6.29e-07	0.000351088
cg02251850	RPTOR	0.149732	2.56e-07	0.000300997
cg13461622	RUNX3	0.143969	1.23e-06	0.000427703
cg17972213	S1PR1	0.149636	5.38e-07	0.000340412
cg02061660	SLC25A46	0.127853	0.000187491	0.00381171
cg09088496	SPATA13	0.124399	1.16e-06	0.000423689
cg26033526	TAP1	0.124068	0.000269935	0.00477821
cg08796342	TC2N	0.127651	1.58e-06	0.000458867
cg17741993	TNF	0.121007	4.14e-07	0.000326814
cg24215459	TNIP3	0.123294	1.98e-07	0.000292549
cg14518276	TRAF1	0.123022	8.6e-07	0.00038498
cg07119830	TRIM8	0.149484	1.71e-07	0.000291469
cg00255699	TRIT1	0.124278	3.46e-07	0.000320396
cg09354050	UBASH3A	0.129745	4.03e-06	0.00062513
cg16265859	UBR4	0.142147	5.09e-08	0.000218862
cg25429672	UCP2	0.123378	1.2e-06	0.000425043
cg10859442	UCP3	0.121243	1.08e-07	0.000264639
cg07218880	UPF3A	0.12736	8.46e-07	0.000383831
cg13860281	VOPP1	0.120473	1.34e-05	0.000985932
cg17095147	WDR1	0.123552	9.14e-06	0.000843599
cg08859278	ZAP70	0.12424	8.84e-07	0.000386617
cg00805874	ZBTB12	0.124556	1.61e-05	0.00106697
cg08539991	ZBTB32	0.125675	9.88e-07	0.000399866
cg24010658	ZC3H3	0.126944	2.87e-06	0.000566101
cg10099732	ZFP36L1	0.144531	2.81e-06	0.000561802
cg06987246	ZNF853	0.129635	1.4e-05	0.00100694

## Sheet: Top 10 hypermethylated site
	Supplementary Table 3-6. Top 10 hypomethylated sites
Infinium Probe Name	Gene name			deltaBeta	P.Value	BH.P.value
cg02530824	PF4			0.197813	0.000108315	0.00274904		Platelet Factor 4
cg11917734	HLA-C			0.188361	0.00297	0.0245642		MHC Class I Antigen Heavy Chain
cg02902412	ATP9B			0.183774	9.8e-08	0.000252996		ATPase Phospholipid Transporting 9B
cg06958535	LAX1			0.163952	2.21e-07	0.000297913		Lymphocyte Transmembrane Adaptor 1
cg05799811	CD247			0.162623	3.48e-06	0.00060106		CD247 Antigen, Zeta Subunit
cg02251850	RPTOR			0.149732	2.56e-07	0.000300997		Regulatory Associated Protein Of MTOR Complex 1
cg17972213	S1PR1			0.149636	5.38e-07	0.000340412		Sphingosine-1-Phosphate Receptor 1
cg07119830	TRIM8			0.149484	1.71e-07	0.000291469		Tripartite Motif Containing 8
cg25140783	RCAN3			0.148267	8.97e-07	0.000388712		RCAN Family Member 3
cg00446123	LIME1			0.1478	6.37e-06	0.000737326		Lck Interacting Transmembrane Adaptor 1

## Sheet: 7genes_in_hyper_hypo_list
	Supplementary Table 3-7. Seven genes showing both hyper- and hypomethylation sites
	Hypomethylated				Hypermethylated
Gene name	Infinium Probe Name	deltaBeta	P.Value	BH.P.value	Infinium Probe Name	deltaBeta	P.Value	BH.P.value
ANKFY1	cg02052762	-0.124205	8.52e-05	0.00240174	cg12077963	0.131574	1.32e-06	0.000437935
FAM49B	cg07212327	-0.141053	0.000127698	0.00302518	cg19123356	0.144292	1.5e-07	0.000280217
GNG7	cg04603130	-0.148877	1.2e-05	0.000944419	cg23463608	0.129161	5.11e-06	0.00068679
INPP5A	cg09163720	-0.126261	1.08e-05	0.000903341	cg13521018	0.146076	5.63e-06	0.000710078
LAX1	cg02573357	-0.120811	3.26e-05	0.00147247	cg06958535	0.163952	2.21e-07	0.000297913
PITPNM2	cg24967811	-0.128174	0.000130403	0.00306407	cg05132828	0.121239	1.18e-06	0.000424808
VOPP1	cg07006935	-0.124905	1.64e-05	0.00107777	cg13860281	0.120473	1.34e-05	0.000985932
