# Supplementary material for: Integration of Genome-Wide DNA Methylation and Transcription Uncovered Aberrant Methylation-Regulated Genes and Pathways in the Peripheral Blood Mononuclear Cells of Systemic Sclerosis
Source: Int J Rheumatol. 2018 Sep 2;2018:7342472. doi: 10.1155/2018/7342472 (PMC6139224; doi:10.1155/2018/7342472)
Supplement: Supplementary 5 — Supplementary Table 4: genomic distribution of differentially methylated positions. [file 7342472.f5.xlsx]

## Sheet: 20 MeDEGs
		Supplementary Table 4-1. The List of 20 MeDEGs and the genomic distribution of altered methylation sites
	probeID	Gene symbol	DeltaBeta	Methylation_BH.P.Value	PROBE_ID	Fold_Change	GeneExpression_BH.P.Value		Type	promotor/nonpromotor	Genomic Location
Hypermethylated/	cg12524168	F2R	0.122312	0.000226239	ILMN_1742866	-2.20333	0.00392637	-0.269493	1	non-promotor	body
Down-regulated	cg08450017	CXCR6	0.141357	0.00119193	ILMN_1674640	-2.05926	0.00740774	-0.291092	1	promotor	TSS200
	cg17587997	FYN	0.126623	0.00044119	ILMN_1781207	-2.04285	0.0457584	-0.25867	1	promotor	5'UTR
	cg05756492	RASSF5	0.126849	0.000383287	ILMN_1813795	-1.91156	0.013845	-0.242479	1	non-promotor	body
	cg09973676	PAG1	0.13152	0.0051917	ILMN_1673640	-1.60861	0.049773	-0.211564	1	promotor	5'UTR
	cg14001486	PRKCH	0.146634	0.000373645	ILMN_1780898	-1.58022	0.00392637	-0.231714	1	non-promotor	body
	cg02374486	PRF1	0.136921	0.000363995	ILMN_1740633	-1.54948	0.0388899	-0.212156	1	promotor	TSS1500
	cg13461622	RUNX3	0.143969	0.000427703	ILMN_1787461	-1.5326	0.00576943	-0.220646	1	promotor	1st Exon
Hypomethylated/	cg08545593	CTSZ	-0.129717	0.000921962	ILMN_1666269	1.5389	0.0332399	-0.19962	1	promotor	TSS1500
Up-regulated	cg09704136	ZYX	-0.128448	0.00078869	ILMN_2371169	1.57675	0.0377338	-0.20253	1	non-promotor	Body
	cg09303642	NFE2	-0.120649	0.00244328	ILMN_1711786	1.5926	0.0429177	-0.192145	1	promotor	TSS1500
	cg27340480	PLAUR	-0.124602	0.00222796	ILMN_1691508	1.59367	0.0339751	-0.198574	1	non-promotor	Body
	cg14187687	SAMD4A	-0.149791	0.000919631	ILMN_2119297	1.69644	0.0299109	-0.254112	1	non-promotor	Body						regulaory element
	cg20098015	ODF3B	-0.132338	0.00847502	ILMN_3241446	1.71898	0.0134304	-0.227486	1	promotor	TSS200
	cg15945333	SPI1	-0.125128	0.00255589	ILMN_1696463	1.75608	0.023792	-0.219735	1	non-promotor	Body
	cg26928972	CSTA	-0.132272	0.0035599	ILMN_1669888	1.92018	0.00499206	-0.253987	1	promotor	TSS1500
	cg05060607	C3AR1	-0.121298	0.00513881	ILMN_1787529	1.93898	0.0115128	-0.235194	1	non-promotor	body
	cg23079808	LTBR	-0.123789	0.000639649	ILMN_1667476	2.26713	0.000256335	-0.280646	1	promotor	TSS1500
	cg24777950	CTSG	-0.12764	0.00236874	ILMN_1680424	3.50053	0.0325092	-0.446807	1	promotor	TSS1500
	cg06100973	ELANE	-0.120133	0.00224674	ILMN_1706635	3.7429	0.0218248	-0.449647	1	promotor	TSS200

## Sheet: 5 non-MeDEGs
		Supplementary Table 4-2. The List of 5 DEGs that demonstrated positive correlation between gene expresion and methylation
	probeID	Gene symbol	DeltaBeta	Methylation_BH.P.Value	PROBE_ID	Fold_Change	GeneExpression_BH.P.Value		Type
Hypomethylated/	cg16604566	MBP	-0.1292	0.000850125	ILMN_2331544	-1.96681	0.0414197	0.254112	0
Down-regulated	cg06059360	NKTR	-0.122126	0.00308353	ILMN_2330994	-1.89834	0.0351654	0.231837	0
	cg27019717	GNG2	-0.132199	0.00229388	ILMN_1807925	-1.66984	0.0436735	0.220751	0
	cg24608504	SPTBN1	-0.136793	0.00404289	ILMN_1661335	-1.66563	0.0214549	0.227847	0
Hypermethylated/up-regulated	cg11917734	HLA-C	0.188361	0.0245642	ILMN_2150787	2.07296	0.0307151	0.390463	0
